# Supplementary material for: Prevalence, pathophysiology, prediction and health-related quality of life of long COVID: study protocol of the longitudinal multiple cohort CORona Follow Up (CORFU) study
Source: PubMed Central journal article supplement — BMJ Open. 2022 Nov 29;12(11):e065142. doi: 10.1136/bmjopen-2022-065142 (PMC9709810; doi:10.1136/bmjopen-2022-065142), 2022-11-29
Supplement: bmjopen-2022-065142.draft_revisions.pdf [file bmjopen-2022-065142.draft_revisions.pdf]

# BMJ Open

BMJ Open is committed to open peer review. As part of this commitment we make the peer review history of every article we publish publicly available.

When an article is published we post the peer reviewers' comments and the authors' responses online. We also post the versions of the paper that were used during peer review. These are the versions that the peer review comments apply to.

The versions of the paper that follow are the versions that were submitted during the peer review process. They are not the versions of record or the final published versions. They should not be cited or distributed as the published version of this manuscript.

BMJ Open is an open access journal and the full, final, typeset and author-corrected version of record of the manuscript is available on our site with no access controls, subscription charges or pay-per-view fees (<http://bmjopen.bmj.com>).

If you have any questions on BMJ Open's open peer review process please email [info.bmjopen@bmj.com](mailto:info.bmjopen@bmj.com)

# BMJ Open

## Prevalence, pathophysiology, prediction and health-related quality of life of long COVID: design of the longitudinal multiple cohort CORona Follow Up (CORFU) study

|                               |                                                                                                                                                                                                                                                                                                                                                                                                                                                                                                                                                                                                                                                                                                                                                                                                                                                                                                                                                                                                                                                                                                                                                                                                                                                                                                                                                                                                                                                                                                                                                                                                                                                                                                                                                                                                                                                                                                                                                                                                                                                                                                                                                                                                                                                                                                                                                                                  |
|-------------------------------|----------------------------------------------------------------------------------------------------------------------------------------------------------------------------------------------------------------------------------------------------------------------------------------------------------------------------------------------------------------------------------------------------------------------------------------------------------------------------------------------------------------------------------------------------------------------------------------------------------------------------------------------------------------------------------------------------------------------------------------------------------------------------------------------------------------------------------------------------------------------------------------------------------------------------------------------------------------------------------------------------------------------------------------------------------------------------------------------------------------------------------------------------------------------------------------------------------------------------------------------------------------------------------------------------------------------------------------------------------------------------------------------------------------------------------------------------------------------------------------------------------------------------------------------------------------------------------------------------------------------------------------------------------------------------------------------------------------------------------------------------------------------------------------------------------------------------------------------------------------------------------------------------------------------------------------------------------------------------------------------------------------------------------------------------------------------------------------------------------------------------------------------------------------------------------------------------------------------------------------------------------------------------------------------------------------------------------------------------------------------------------|
| Journal:                      | <i>BMJ Open</i>                                                                                                                                                                                                                                                                                                                                                                                                                                                                                                                                                                                                                                                                                                                                                                                                                                                                                                                                                                                                                                                                                                                                                                                                                                                                                                                                                                                                                                                                                                                                                                                                                                                                                                                                                                                                                                                                                                                                                                                                                                                                                                                                                                                                                                                                                                                                                                  |
| Manuscript ID                 | bmjopen-2022-065142                                                                                                                                                                                                                                                                                                                                                                                                                                                                                                                                                                                                                                                                                                                                                                                                                                                                                                                                                                                                                                                                                                                                                                                                                                                                                                                                                                                                                                                                                                                                                                                                                                                                                                                                                                                                                                                                                                                                                                                                                                                                                                                                                                                                                                                                                                                                                              |
| Article Type:                 | Protocol                                                                                                                                                                                                                                                                                                                                                                                                                                                                                                                                                                                                                                                                                                                                                                                                                                                                                                                                                                                                                                                                                                                                                                                                                                                                                                                                                                                                                                                                                                                                                                                                                                                                                                                                                                                                                                                                                                                                                                                                                                                                                                                                                                                                                                                                                                                                                                         |
| Date Submitted by the Author: | 27-May-2022                                                                                                                                                                                                                                                                                                                                                                                                                                                                                                                                                                                                                                                                                                                                                                                                                                                                                                                                                                                                                                                                                                                                                                                                                                                                                                                                                                                                                                                                                                                                                                                                                                                                                                                                                                                                                                                                                                                                                                                                                                                                                                                                                                                                                                                                                                                                                                      |
| Complete List of Authors:     | <p>Ghossein-Doha, Chahinda; Maastricht UMC+, Department of Cardiology; Maastricht University, Cardiovascular Research Institute Maastricht (CARIM)</p> <p>Wintjens, Marieke SJN; Maastricht UMC+, Department of Clinical Epidemiology and Medical Technology Assessment; Maastricht UMC+, Intensive Care Medicine</p> <p>Janssen, Emma BNJ; Maastricht UMC+, Department of Obstetrics and Gynaecology; Maastricht University, Cardiovascular Research Institute Maastricht (CARIM)</p> <p>Klein, Dorthe; Maastricht UMC+, Department of Clinical Epidemiology and Medical Technology Assessment; Maastricht University, Care and Public Health Research Institute (CAPHRI)</p> <p>Heemskerk, Stella; Maastricht UMC+, Department of Clinical Epidemiology and Medical Technology Assessment; Maastricht University, Care and Public Health Research Institute (CAPHRI)</p> <p>Asselbergs, Folkert; University Medical Centre Utrecht, Department of Cardiology; University College London, Institute of Cardiovascular Science, Faculty of Population Health Sciences, Health Data Research UK and Institute of Health Informatics</p> <p>Birnie, Erwin ; EuroQol Research Foundation; University Medical Centre Groningen, Department of Genetics</p> <p>Bonsel, Gouke J.; EuroQol Research Foundation</p> <p>van Bussel, Bas; Maastricht UMC+, Department of Intensive Care; Maastricht University, Care and Public Health Research Institute (CAPHRI)</p> <p>Cals, Jochen; Maastricht University, Department of Family Medicine; Maastricht University, Care and Public Health Institute (CAPHRI)</p> <p>Ten Cate, Hugo; Maastricht UMC+, Department of Biochemistry, Department of Internal Medicine, Thrombosis Expert Centre; Maastricht University, Department of Biochemistry, Cardiovascular Research Institute Maastricht (CARIM)</p> <p>Haagsma, Juanita; Erasmus MC, Department of Public Health</p> <p>Hemmen, Bena; Maastricht University, Department of Rehabilitation Medicine, Functioning, Participation &amp; Rehabilitation; Maastricht University, Care and Public Health Institute (CAPHRI)</p> <p>van der Horst, Iwan; Maastricht University Medical Centre+, Department of Intensive Care; Maastricht University, Cardiovascular Research Institute Maastricht (CARIM)</p> <p>Kietselaer, Bastiaan; Zuyderland Medical Centre Heerlen, Department of</p> |

|           |                                                                                                                                                                                                                                                                                                                                                                                                                                                                                                                                                                                                                                                                                                                                                                                                                                                                                                                                                                                                                                                                          |
|-----------|--------------------------------------------------------------------------------------------------------------------------------------------------------------------------------------------------------------------------------------------------------------------------------------------------------------------------------------------------------------------------------------------------------------------------------------------------------------------------------------------------------------------------------------------------------------------------------------------------------------------------------------------------------------------------------------------------------------------------------------------------------------------------------------------------------------------------------------------------------------------------------------------------------------------------------------------------------------------------------------------------------------------------------------------------------------------------|
|           | <p>Cardiology<br/>Klok, Frederikus; Leiden University Medical Center, Department of Thrombosis and Hemostasis<br/>de Kruif, Martijn; Zuyderland Medical Centre Heerlen, Department of Pulmonology<br/>Linschoten, Marijke; University Medical Centre Utrecht, Department of Cardiology; Netherlands Heart Institute<br/>van Santen, Susanne; Maastricht UMC+, Department of Intensive Care; Maastricht University, Care and Public Health Institute (CAPHRI)<br/>Vernooy, Kevin; Maastricht UMC+, Department of Cardiology; Maastricht University, Cardiovascular Research Institute Maastricht (CARIM)<br/>Willems, Loes H.; Radboudumc Radboud Institute for Health Sciences, Department of Surgery<br/>Westerborg, Rosa; Zuyderland Medical Centre Heerlen, Department of Pulmonology<br/>Warle, Michiel; Radboudumc Radboud Institute for Health Sciences, Department of Surgery<br/>van Kuijk, Sander; Maastricht UMC+, Department of Clinical Epidemiology and Medical Technology Assessment; Maastricht University, Care and Public Health Institute (CAPHRI)</p> |
| Keywords: | COVID-19, EPIDEMIOLOGY, Protocols & guidelines < HEALTH SERVICES ADMINISTRATION & MANAGEMENT, Public health < INFECTIOUS DISEASES                                                                                                                                                                                                                                                                                                                                                                                                                                                                                                                                                                                                                                                                                                                                                                                                                                                                                                                                        |
|           |                                                                                                                                                                                                                                                                                                                                                                                                                                                                                                                                                                                                                                                                                                                                                                                                                                                                                                                                                                                                                                                                          |

SCHOLARONE™  
Manuscripts

1  
2  
3 **Prevalence, pathophysiology, prediction and health-related quality of life of long COVID:**  
4 **design of the longitudinal multiple cohort CORona Follow Up (CORFU) study**  
5  
6

7 **AUTHORS AND AFFILIATIONS**

8 C Ghossein-Doha\*, MSJN Wintjens\*, EBNJ Janssen, DO Klein, SCM Heemskerk, FW  
9 Asselbergs, E Birnie, GJ Bonsel, BCT van Bussel, JWL Cals, H ten Cate, JA Haagsma, B  
10 Hemmen, ICC van der Horst, BLJH Kietselaer, FA Klok, MD de Kruif, M Linschoten, S van  
11 Santen, K Vernooy, LH Willems, R Westerborg, MC Warlé, SMJ van Kuijk  
12  
13

14 \* Equal contribution  
15

16 **Corresponding author:** SMJ van Kuijk, Department of Clinical Epidemiology and Medical  
17 Technology Assessment, Care and Public Health Research Institute (CAPHRI), Maastricht  
18 University Medical Center+, Maastricht, P.O. Box 5800, 6202 AZ, The Netherlands,  
19 sander.van.kuijk@mumc.nl  
20  
21

22  
23 **Co-authors:**

24 Chahinda Ghossein-Doha  
25 Department of Obstetrics and Gynaecology, Cardiovascular Research Institute Maastricht  
26 (CARIM), Maastricht University Medical Center+, Maastricht, The Netherlands.  
27 Department of Cardiology, Cardiovascular Research Institute Maastricht (CARIM),  
28 Maastricht University Medical Center+, Maastricht, The Netherlands.  
29

30  
31 Marieke SJN Wintjens

32 Department of Clinical Epidemiology and Medical Technology Assessment, Care and Public  
33 Health Research Institute (CAPHRI), Maastricht University Medical Center+, Maastricht, The  
34 Netherlands.  
35 Department of Intensive Care Medicine, Care and Public Health Research Institute (CAPHRI),  
36 Maastricht University Medical Center+, Maastricht, The Netherlands.  
37  
38

39  
40 Emma BNJ Janssen

41 Department of Obstetrics and Gynaecology, Cardiovascular Research Institute Maastricht  
42 (CARIM), Maastricht University Medical Center+, Maastricht, The Netherlands.  
43 Department of Clinical Epidemiology and Medical Technology Assessment, Care and Public  
44 Health Research Institute (CAPHRI), Maastricht University Medical Center+, Maastricht, The  
45 Netherlands.  
46  
47

48  
49 Dorthe O Klein

50 Department of Clinical Epidemiology and Medical Technology Assessment, Care and Public  
51 Health Research Institute, Maastricht University Medical Center+, Maastricht, The  
52 Netherlands.  
53

54  
55 Stella CM Heemskerk

56 Department of Clinical Epidemiology and Medical Technology Assessment, Care and Public  
57 Health Research Institute (CAPHRI), Maastricht University Medical Center+, Maastricht, The  
58 Netherlands.  
59  
60

1  
2  
3 Folkert W Asselbergs

4 Department of Cardiology, University Medical Center Utrecht, Utrecht University, The  
5 Netherlands.

6  
7 Institute of Cardiovascular Science, Faculty of Population Health Sciences, University College  
8 London, London, United Kingdom.

9 Health Data Research UK and Institute of Health Informatics, University College London,  
10 London, United Kingdom.  
11

12  
13 Erwin Birnie

14 EuroQol Group Executive Office, Rotterdam, The Netherlands.

15 Department of Genetics, University Medical Center Groningen, University of Groningen,  
16 Groningen, The Netherlands  
17

18  
19 Gouke J Bonsel

20 EuroQol Group Executive Office, Rotterdam, The Netherlands.  
21

22  
23 Bas CT van Bussel

24 Department of Intensive Care Medicine, Care and Public Health Research Institute (CAPHRI),  
25 Maastricht University Medical Center+, Maastricht, The Netherlands.  
26

27  
28 Jochen WL Cals

29 Department of Family Medicine, Care and Public Health Research Institute (CAPHRI),  
30 Maastricht University, Maastricht, The Netherlands.  
31

32  
33 Hugo ten Cate

34 Department of Biochemistry, Cardiovascular Research Institute Maastricht (CARIM),  
35 Maastricht University, Maastricht, The Netherlands.

36 Department of Internal Medicine, Maastricht University Medical Center+, Maastricht, The  
37 Netherlands.  
38

39 Thrombosis Expert Centre Maastricht, Maastricht University Medical Center+, Maastricht,  
40 The Netherlands.  
41

42  
43 Juanita A Haagsma

44 Department of Public Health, Erasmus University Medical Center Rotterdam, Rotterdam,  
45 The Netherlands.  
46

47  
48 Bena Hemmen

49 Department of Rehabilitation Medicine, Functioning, Participation & Rehabilitation, Care  
50 and Public Health Research Institute (CAPHRI), Maastricht University, The Netherlands.

51 Adelante Centre of Expertise in Rehabilitation and Audiology, Hoensbroek, The Netherlands.  
52

53  
54 Iwan CC van der Horst

55 Department of Intensive Care Medicine, Cardiovascular Research Institute Maastricht  
56 (CARIM), Maastricht University Medical Center+, Maastricht, The Netherlands.  
57

58  
59 Bas LJH Kietselaer

60 Department of Cardiology, Zuyderland Medical Center, Heerlen, The Netherlands.

1  
2  
3  
4 Frederikus A Klok  
5 Department of Medicine - Thrombosis and Hemostasis, Leiden University Medical Center,  
6 Leiden, The Netherlands.  
7  
8

9 Martijn D de Kruif  
10 Department of Pulmonology, Zuyderland Medical Center, Heerlen, The Netherlands.  
11  
12

13 Marijke Linschoten  
14 Department of Cardiology, University Medical Center Utrecht, Utrecht University, The  
15 Netherlands; Netherlands Heart Institute, Utrecht, The Netherlands.  
16  
17

18 Susanne van Santen  
19 Department of Intensive Care Medicine, Care and Public Health Research Institute (CAPHRI),  
20 Maastricht University Medical Center+, Maastricht, The Netherlands.  
21  
22

23 Kevin Vernooy  
24 Department of Cardiology, Cardiovascular Research Institute Maastricht (CARIM),  
25 Maastricht University Medical Center+, Maastricht, The Netherlands.  
26  
27

28 Loes H Willems  
29 Department of Surgery, Radboud Institute of Health Sciences (RIHS), Radboud University  
30 Medical Center, Nijmegen, The Netherlands  
31  
32

33 Rosa Westerborg  
34 Department of Pulmonology, Zuyderland Medical Center, Heerlen, The Netherlands.  
35  
36

37 Michiel C Warlé  
38 Department of Surgery, Radboud Institute of Health Sciences (RIHS), Radboud University  
39 Medical Center, Nijmegen, The Netherlands.  
40  
41

42 Sander MJ van Kuijk  
43 Department of Clinical Epidemiology and Medical Technology Assessment, Care and Public  
44 Health Research Institute (CAPHRI), Maastricht University Medical Center+, Maastricht, The  
45 Netherlands  
46  
47

48 **Word count:** 3.886

49 **Keywords:** Long COVID, PACS (Post-Acute sequelae SARS-CoV-2 infection), protocol,  
50 multiple cohort study, epidemiology, prediction model  
51  
52  
53  
54  
55  
56  
57  
58  
59  
60

## ABSTRACT

**Introduction** The variety, time patterns and long term prognosis of persistent COVID-19 symptoms (long COVID) in patients who suffered from mild to severe acute COVID-19 are incompletely understood. Cohort studies will be combined to describe the prevalence of long COVID symptoms, and to explore the pathophysiological mechanisms and impact on health-related quality of life. A prediction model for long COVID will be developed and internally validated to guide care in future patients.

**Methods and analysis** Data from seven COVID-19 cohorts will be aggregated in the longitudinal multiple cohort CORona Follow Up (CORFU) study. CORFU includes Dutch patients who suffered from COVID-19 at home, were hospitalized without or with intensive care unit treatment, needed inpatient or outpatient rehabilitation, and controls who did not suffer from COVID-19. Individual cohort study designs were aligned and follow-up has been synchronized. Cohort participants will be followed up for a maximum of 24 months after acute infection. Next to the clinical characteristics measured in individual cohorts, the CORFU questionnaire on long COVID outcomes and determinants will be administered digitally at 3, 6, 12, 18 and 24 months after the infection. The primary outcome is the prevalence of long COVID symptoms up to two years after acute infection. Secondary outcomes are health-related quality of life (e.g. EQ-5D), physical functioning, and the prevalence of thromboembolic complications, respiratory complications, cardiovascular diseases and endothelial dysfunction. A prediction model and a patient platform prototype will be developed.

**Ethics and dissemination** Approval was obtained from the medical research ethics committee of Maastricht University Medical Center+ and Maastricht University (METC 2021-2990) and local committees of the participating cohorts. The project is supported by ZonMW and EuroQol Research Foundation. Results will be published in open access peer-reviewed scientific journals and presented at (inter)national conferences.

**Trial registration number** ClinicalTrials.gov Identifier: NCT05240742

## Article summary

### Strengths and limitations of this study

- ◆ Survivors from seven existing COVID-19 cohorts will be asked to participate in CORFU; clinical data will be aggregated and enriched with results from questionnaires on symptoms, health-related quality of life and societal impact at synchronized follow-up moments to estimate the prevalence and pathophysiological mechanisms of long COVID, the impact on health-related quality of life, and their key determinants.
- ◆ A control group of Dutch participants from the general population, who did not suffer from COVID-19, will be included for comparison with regard to the prevalence and health-related quality of life.
- ◆ The heterogeneous cohort populations enable CORFU to investigate study aims in various subgroups (e.g. home-isolated versus hospitalized patients) and test pathophysiological hypotheses.
- ◆ An overrepresentation of (former) COVID-19 patients admitted to the hospital (ward or intensive care unit) might exist, potentially resulting in overrepresentation of more severe cases of long COVID, all of which will be considered in the analysis and presentation.

## INTRODUCTION

The World Health Organization (WHO) defines the post-COVID-19 condition, also known as long COVID, as a condition that occurs three months from the onset of infection, with symptoms that last for at least two months and are not explained by an alternative diagnosis.<sup>1</sup> The prevalence of long COVID symptoms varies in literature, ranging from 40% and 68% six months after COVID-19 diagnosis and up to 49% after twelve months.<sup>2-4</sup> Frequently reported symptoms include fatigue, shortness of breath, headache, cognitive impairment (e.g. concentration problems), muscle weakness and joint stiffness.<sup>5-8</sup> Persistent long COVID symptoms are associated with poorer health-related quality of life.<sup>9 10</sup> Furthermore, there is an increased risk of incident cardiovascular complaints and cardiovascular diseases for people who suffered from COVID-19 beyond the first month of infection.<sup>11 12</sup> Next to the physical and mental symptoms of long COVID, there is a psychological and emotional impact which might be induced by the social restrictions and financial impact (including income uncertainty) during the pandemic.<sup>13 14</sup>

Long COVID occurs both in patients with mild and with severe acute course. So far, the severity of the acute infection seems related to the risk of long COVID symptoms.<sup>15-17</sup> Additional factors affecting the risk of long COVID are the presence of one or more pre-existent comorbidities and being a middle-aged female.<sup>16 18 19</sup> Whether the type of severe acute respiratory syndrome coronavirus 2 (SARS-CoV-2) strain relates to long COVID is unknown.

In patients suffering from critical COVID-19 in the ICU, long COVID symptoms may co-exist with, or be indistinguishable from, the post-IC syndrome (PICS), defined as newly emerging physical, cognitive, or mental limitations after suffering from severe disease during ICU stay.<sup>20</sup>

Due to the novelty of COVID-19, studies focus on short term physical functioning and mental well-being. However, less is known about persisting COVID-19 symptoms up to two years after acute infection, and the factors determining prognosis (if any). More knowledge will facilitate long COVID (health)care and follow-up (e.g. specific services such as (lung)rehabilitation and occupational support) for specific patient groups, guided by prognostic information. This knowledge may translate into national and international guidelines on the prevention, diagnosis, and treatment of long COVID.

This paper describes the protocol of the CORona Follow Up (CORFU) study: a national longitudinal, multiple cohort study that aggregates data of existing cohorts and enriches these data with repeated digital follow-up questionnaires on long COVID symptoms and health-related quality of life up to two years after the first infection. Five aims, summarized in four work packages (WP), have been formulated:

- ◆ WP1:
  - a) To describe the prevalence, severity, time patterns and duration of long COVID symptoms up to two years after acute infection and their relationship with health-related quality of life.
  - b) To describe the received rehabilitation and paramedical support in relation to the persisting symptoms and health-related quality of life.
- ◆ WP2:

To investigate the pathophysiological mechanisms that may cause long COVID symptoms and the role of vulnerability/resilience factors.



- ◆ WP3:  
To develop and validate a prediction model for the persistence of symptoms, stratified by severity of COVID-19.
- ◆ WP4 (in collaboration with EuroQol Research Foundation):  
Develop a patient platform prototype where patients can digitally consult their reported outcomes, compare them with previous outcomes, relate to reference information, and find reported information that fits their situation.

## METHODS AND ANALYSIS

### Study design

The CORFU study is a longitudinal multiple cohort study that aggregates data of seven existing Dutch COVID-19 cohorts, prospectively complemented with routinely collected outcome data on long COVID, with a maximum follow-up of 24 months after initial infection. Data will be collected between October 1, 2021 and December 31, 2022.

All cohorts were initiated and designed to conduct COVID-19 research. Six cohorts will collect data according to their individual clinical focus (Figure 1). In addition, participants from the community-based POPulation health impact of the COVID-19 pandemic (POPCOrn) cohort will serve as a control group as this cohort partly consists of controls who did not suffer from COVID-19. However, at present, many of the POPCOrn participants could have suffered from (mild) COVID-19. Therefore, all POPCOrn participants will be asked repeatedly to report whether or not they suffered from (confirmed or suspected) COVID-19 and only the participants who did not suffer from COVID-19 will serve as a control. In the POPCOrn cohort, similar outcome data will be collected as in the other participating cohorts. As CORFU is open to new collaborations, it is likely that additional cohorts will join CORFU in the future. Participation of new cohorts will be reported when presenting the CORFU study findings.

The cohort-specific follow-up measurements will be complemented by a repeatedly administered CORFU questionnaire covering the full array of long COVID symptoms, health-related quality of life effects, and their key determinants. Furthermore, (clinical) data that has already been collected in the participating cohorts during the acute COVID-19 stage will be used to investigate the CORFU study aims.

### Participants

The study population consists of Dutch (former) COVID-19 survivors and non-COVID-19 controls, who have been included in one of the cohorts and categorized into five subgroups:

- ◆ Patients who suffered from (confirmed) COVID-19 admitted to the hospital ward;
- ◆ Patients who suffered from (confirmed) COVID-19 admitted to the ICU;
- ◆ Patients who suffered from (confirmed or suspected) COVID-19 at home;
- ◆ Patients who suffered from (confirmed) COVID-19 and needed inpatient or outpatient rehabilitation after infection at home or in the hospital (ward and/or ICU);
- ◆ Controls who did not suffer from (confirmed or suspected) COVID-19.

Adult participants ( $\geq 18$  years) with confirmed or suspected COVID-19 and non-COVID-19 controls who sufficiently master the Dutch language will be eligible for inclusion in the CORFU study. No additional exclusion criteria will be used. In addition to provided consent or no declared objection for initial cohort participation, all participants will be asked to give

written and/or digital informed consent prior to the first CORFU follow-up questionnaire (if not already covered by the specific cohort inclusion scheme).

### Data sources: COVID-19 cohorts

Data will be derived from the following seven COVID-19 cohorts:

- ◆ Adelante cohort<sup>21</sup>;
- ◆ Bernhoven early detection of vascular damage after COVID-19 (COVAS) cohort<sup>22</sup>;
- ◆ Cardiac complications in patients with COVID-19 (CAPACITY-COVID) cohort<sup>23 24</sup>;
- ◆ Dutch COVID and Thrombosis Consortium (DC&TC) cohort<sup>25</sup>;
- ◆ MaastrICChT cohort<sup>26</sup>;
- ◆ POPulation health impact of the COVID-19 pandemic (POPCOrn) cohort<sup>27</sup>;
- ◆ ZuydErLand COVID-19 regiStry (ELVIS) cohort<sup>28</sup>.

Figure 1 shows the aims, study population, and outcomes of each cohort. Electronic case report forms will be used to facilitate data aggregation in order to answer the CORFU study aims. Moreover, the study designs of the majority of the individual cohorts have been aligned in the conceptualization phase. This includes synchronization of the follow-up moments during which CORFU data will be collected prospectively, as well as a synchronization of the additional (clinical) data that will be collected in the individual cohorts, including their level of measurement.

In May 2022, the total source population of the participating cohorts included 12,631 participants. However, the total number of CORFU participants will be lower, as it depends on the survival and the CORFU response rates in the individual cohorts, as well as the number of participants which are included in multiple cohorts. In addition, five out of seven cohorts are prospectively including new patients. The CORFU study population will be described in more detail when reporting the study findings.

### Data collection: CORFU questionnaire

Besides the clinical data collection in the cohorts, the CORFU questionnaire will be periodically administered to study participants up to two years after suffering from COVID-19. The CORFU questionnaire is based on an internationally developed basic questionnaire on persistent symptoms after COVID-19.<sup>27</sup> It is digitally adaptive and includes questions on the following outcomes and determinants:

#### Outcomes:

- ◆ Long COVID symptoms, with a 5-level severity scale;
- ◆ Health-related quality of life (EQ-5D-5L, EQ-VAS);
- ◆ Anxiety and depression (HADS, GAD-2, PHQ-2);
- ◆ Social participation and connectedness;
- ◆ Experienced stigmatization and resilience;
- ◆ Consequences for employment status and personal income.

#### Determinants:

- ◆ COVID-19 related factors (e.g. date of diagnosis and/or clinical admission, severity, wave as surrogate for SARS-CoV-2 strain);
- ◆ Socio-demographic and diversity factors (e.g. age, sex, gender, socio-economic);

- ◆ Presence of chronic disease or pre-existing vulnerability;
- ◆ Impact on healthcare access and experienced quality, healthcare avoidance and self-care;
- ◆ Vaccination status at the moment of acute infection.

The CORFU questionnaire will be digitally administered at 3, 6, 12, 18 and 24 months after COVID-19 via a web-based survey or, if requested, on paper. On an individual level, the follow-up moments on which the CORFU questionnaire will be administered depends on the date of first infection (diagnosis and/or admission). In retrospect, not all follow-up moments will apply to all participants. As the CORFU study duration is 15 months, participants will receive a maximum of three CORFU questionnaires. Completing the questionnaire takes, on average, 20-25 minutes, and participants will receive regular reminders to optimize the response rate.

### **Outcome variables**

The primary outcome is the prevalence of long COVID symptoms up to two years after infection. Symptoms include, but are not limited to, fatigue, muscle weakness, respiratory complaints, cardiovascular complaints, cognitive impairment, anxiety and depression. Secondary outcomes are health-related quality of life, physical functioning, and the prevalence of thromboembolic complications, respiratory complications, cardiovascular diseases and endothelial dysfunction.

### **Data management and data safety**

The data will be stored and accessible according to Findability, Accessibility, Interoperability, and Reusability (FAIR) data standards.<sup>29</sup> For this, we will apply a machine-readable metadata scheme. Two trusted third parties will administer the digital questionnaires in the individual cohorts: Durrer Center for Cardiovascular Research, Amsterdam, the Netherlands, and Triqs, Zwolle, the Netherlands. Durrer Center facilitates autonomous and secure data management and is founded by the Netherlands Heart Institute. Triqs is an innovative research agency facilitating data collection through digital questionnaires.

The data flow is as follows. First, Durrer Center will receive participants' contact details from the participating cohorts, check these for any flaws (e.g. missing contact details and duplications) and encrypt the contact details except email prior to sharing these with Triqs. Next, Triqs will invite the participants for consent and, subsequently, for participation in the CORFU questionnaire. Upon consent, participants will digitally receive the questionnaires. After that, Triqs will store the resulting data records (still encrypted) and send these to Durrer Center. Durrer Center will decrypt and subsequently verify each data record and create a pseudo-anonymized dataset which will be made available to the CORFU research group and the participating cohorts. As part of the data process, obligatory General Data Protection Regulation (GDPR) contracts will be created between the participating hospitals (care units), Durrer Center, Triqs, and the CORFU study unit. In addition, data access agreements will be arranged between the CORFU study unit and the participating cohorts; post-study secondary analysis of the survey data has been agreed upon in collaboration with the EuroQol Research Foundation. Both Durrer Center and Triqs work processes and facilities meet the Dutch privacy legislation standards (International Organization for Standardization (ISO) and NEDerlandse Norm (NEN) norms).

### Work packages and data analysis

This paragraph describes a generic outline of aims and methods of the work packages. Future manuscripts on CORFU work package findings will describe the aims and used methods in more detail. Table 1 displays the work packages (WPs) and the corresponding aims and involved cohorts. Within all WPs, baseline data of participants will be described in detail, stratified by subgroup if necessary. Missing data will be imputed if the percentage of incomplete records exceeds 5% using multiple imputation with fully conditional specification (FCS). The number of imputations will be set to the percentage of incomplete records, and values will be drawn using predictive mean matching.<sup>30</sup>

**Table 1.** Overview of the work packages, including study aims and cohorts

| WP  | Aim                                                                                                                                                                                                                                                                                                                                     | Cohorts involved <sup>a</sup>                                                                |
|-----|-----------------------------------------------------------------------------------------------------------------------------------------------------------------------------------------------------------------------------------------------------------------------------------------------------------------------------------------|----------------------------------------------------------------------------------------------|
| WP1 | 1. Describe the prevalence, severity, time patterns and duration of long COVID symptoms up to two years after acute infection and their relationship with health-related quality of life.<br>2. Describe the received rehabilitation and paramedical support in relation to the persisting symptoms and health-related quality of life. | Data from all cohorts will be used.                                                          |
| WP2 | 3. Describe the pathophysiological mechanisms that may cause long COVID symptoms and the role of vulnerability/resilience factors.                                                                                                                                                                                                      | Every cohort will deliver results for specific pathophysiological hypotheses.                |
| WP3 | 4. Develop and validate a prediction model for the persistence of symptoms, stratified by severity of COVID-19.                                                                                                                                                                                                                         | Data from all cohorts will be used.                                                          |
| WP4 | 5. Develop a patient platform prototype where patients can digitally consult their reported outcomes, compare them with previous outcomes, relate to reference information, and find reported information that fits their situation.                                                                                                    | The platform will be developed and tested in a limited number of cohorts (to be determined). |

<sup>a</sup> CORFU cohorts include Adelante, CAPACITY-COVID, COVAS, DC&TC, ELVIS, MaastrICcht and POPCorn.

**Abbreviations:** CAPACITY-COVID: Cardiac complications in patients with COVID-19 cohorts; COVAS: Bernhoven Early detection of Vascular damage after COVID-19 cohort; DC&TC cohort: Dutch COVID & Thrombosis Consortium cohort; ELVIS: ZuydErLand COVID-19 regiSty; MaastrICcht: Maastricht Intensive Care COVID cohort; POPCorn: POPulation health impact of the COVID-19 pandemic; WP: work package.

WP1 will investigate the first and second study aims. First, data of the seven cohorts will be aggregated and used to estimate the prevalence and severity of long COVID symptoms, expressed as a percentage with a 95% confidence interval and as a distribution of severity scores at every follow-up moment. Next, the association between symptom severity and health-related quality of life will be quantified using linear regression analysis and repeated measurements analysis, adjusted for potential confounders. Finally, rehabilitation and paramedical support will be described using descriptive statistics. Analyses will be stratified by participant subgroups (i.e. suffered from COVID-19 at home, admitted to hospital ward, admitted to ICU ward). Furthermore, clusters of patients with similar long COVID symptoms will be explored to describe various long COVID phenotypes (such as cardiac complaints) using K-means cluster analyses and hierarchical clustering.<sup>31</sup>

WP2 will investigate the third study aim. Each cohort will formulate specific long COVID research questions related to various pathophysiological mechanisms and data availability. Table 2 shows examples of research questions that will be studied. To explore these pathophysiological mechanisms, data of different cohorts will be aggregated when

possible. Next, we will develop directed acyclic graphs (DAGs), presenting (presumed) causal relationships based on current knowledge and new hypotheses while considering long COVID phenotypes identified in WP1. Subsequently, multivariable regression modelling will be used to test the various causal models (expressed in DAGs). Confounding, effect modification, and mediation will be considered by testing as model parameters. Associations will be presented as regression coefficients or odds ratios, including 95% confidence intervals. Analyses will be performed separately for the individual cohort data and for the joint cohort data in which the same outcome measures were used.

**Table 2.** Overview of work package 2 (WP2) hypotheses on pathophysiological mechanisms that might cause long COVID symptoms

| Pathophysiological mechanism          | Main research questions include, but are not limited to:                                                                                                                                                             | Cohort (minimally) involved |
|---------------------------------------|----------------------------------------------------------------------------------------------------------------------------------------------------------------------------------------------------------------------|-----------------------------|
| Thromboembolic complications          | 1. What is the impact of venous thromboembolic complications on long-term functional outcomes in COVID-19 survivors?                                                                                                 | DC&TC                       |
| Cardiovascular diseases               | 2. What is the impact of myocardial damage during hospital ward or ICU stay due to COVID-19 on angina pectoris and dyspnea over time?                                                                                | CAPACITY-COVID              |
| Endothelial dysfunction               | 3. What is the relationship between elevated inflammation parameters and persistent thrombo-inflammation, coagulation, microvascular and macrovascular dysfunction, and respiratory symptoms after COVID-19 disease? | COVAS                       |
| Multi organ failure                   | 4. What is the impact of multi-organ failure during ICU stay on long-term functional outcomes and (health-related) quality of life in COVID-19 survivors?                                                            | MaastrICChT                 |
| Pre-existing coronary atherosclerosis | 5.<br>6. What is the relationship between pre-existing clinical and subclinical coronary atherosclerosis, angina pectoris, and respiratory symptoms after COVID-19 infection?                                        | ELVIS                       |
| NA                                    | 7. What is the level of functioning during the course of disease in patients following a rehabilitation program after COVID-19 related ICU admission?                                                                | Adelante                    |

**Abbreviations:** CAPACITY-COVID: Cardiac complications in patients with COVID-19 cohorts; COVAS: Bernhoven Early detection of Vascular damage after COVID-19 cohort; DC&TC cohort: Dutch COVID & Thrombosis Consortium cohort; ELVIS: ZuydErLand COVID-19 regiStry; MaastrICChT: Maastricht Intensive Care COVID cohort; NA: not applicable; POPCOrn: POPulation health impact of the COVID-19 pandemic

WP3 will investigate the fourth study aim. In order to develop a prediction model, we will aim to identify the set of predictors, measured at time of COVID-19 diagnosis and during the course of the disease, that will maximize the ability to discriminate patients who experience long COVID symptoms from patients who do not experience these symptoms. Potential predictors will be selected from the living review by Wynants et al. and recent literature.<sup>32</sup> Using backward stepwise elimination on the Akaike Information Criterion in logistic regression analysis, the initial model structure and parameters (including follow-up period) will be estimated. Additionally, the model will be internally validated using bootstrapping techniques.

WP4 will address the fifth study aim: developing and testing a patient platform prototype. As the patient platform will be connected to the digital questionnaire platform, individual CORFU questionnaire responses can be presented individually to the

1  
2  
3 corresponding patient. It offers the possibility for patients to consult their own situation,  
4 compare this with the past and with the situation of similar patients, profit from suggestions  
5 of other patients in similar situations, and gain insight into their future health. The specific  
6 content (e.g. which symptom domains and other domains of interest) to be presented in the  
7 patient platform will be based on focus groups with healthcare professionals, (former)  
8 patients and patient representatives. Patient platforms aim to increase empowerment and  
9 reassurance (outcomes tested) and might provide guidance in healthcare-seeking and self-  
10 care. By providing feedback on the given answers, the platform increase patients'  
11 knowledge and self-consciousness about the potential existence of long COVID-19  
12 symptoms and change over time, thereby putting them in own data-driven control on their  
13 health situation.  
14  
15  
16  
17

### 18 **Sample size calculation**

19 The sample size for this study is established pragmatically. A heterogeneous sample  
20 of COVID-19 patients is included by choosing different cohorts with considerable  
21 heterogeneity in the severity of the disease, national coverage and without any exclusion  
22 criteria. This resulted in a collection of seven small to very large cohorts. Our sample size  
23 calculations of WP1, WP2, and WP3 are based on the smallest subgroup of patients that will  
24 be analyzed in this study.  
25

26 Firstly, for estimating the prevalence of long COVID symptoms (WP1), for the least  
27 favorable percentage of 50% (the variance of a percentage is highest at 50%), the maximum  
28 width of the 95% confidence interval will be approximately plus and minus 5%. For all other  
29 percentages, the confidence interval will be even smaller. Secondly, for investigating the  
30 pathophysiological mechanisms that may cause long COVID symptoms (WP2), there will be  
31 sufficient power to detect associations with symptom severity, expressed in standardized  
32 effect size (Cohen's *d*) of 0.3, with a power of 80% and a type-I error of 5%. Thirdly, for the  
33 development of a prediction model for long COVID complaints (WP3), we anticipate a large  
34 number of cases, taking into account that 57% of patients suffered from at least one long  
35 COVID complaint up to six months after infection.<sup>15</sup> Depending on the response rate and  
36 resulting sample size, we will determine the maximum number of candidate predictors we  
37 can use for multivariable modeling with the method of Riley et al., allowing a maximum  
38 shrinkage of predictor coefficients of 0.9.<sup>33</sup>  
39

40 Statistical tests or estimations are not part of WP4. Therefore, sample size or  
41 statistical power calculations are not applicable for WP4.  
42  
43  
44  
45

### 46 **Patient and public involvement**

47 Patient organizations (Family and patient Centered Intensive Care (FCIC), IC Connect and the  
48 'Hartenraad') and patients of the Maastricht University Medical Centre+ (MUMC+) Intensive  
49 Care panel were involved in the design of the CORFU study. Patients were involved in the  
50 development and testing of the international basic questionnaire on persistent symptoms  
51 after COVID-19, which serves as the basis for the CORFU questionnaire. In addition, patients  
52 provided feedback on the phrasing of questions, the fill-out time of the questionnaire and  
53 the willingness to fill out the questionnaire periodically. Participants will be able to provide  
54 feedback on the (missing) content of the CORFU questionnaire through an open-ended  
55 question. Comments will be discussed and implemented prospectively when deemed  
56 relevant, making the CORFU questionnaire a continuously developing measurement  
57 instrument.  
58  
59  
60

1  
2  
3 Patients will have an advisory role in developing the patient platform prototype  
4 (WP4), which allows patients to digitally consult their answers in real-time and compare  
5 them with reference populations. In addition, advice will be asked on the (type of) provided  
6 feedback questions, the formatting and visualization of answers, and the relevant reference  
7 groups to be considered. Eventually, CORFU findings will be presented in a lay summary,  
8 and a flyer on long COVID will be developed in close collaboration with patients. The  
9 dissemination strategy of CORFU findings and the long COVID flyer will be based on patient  
10 and public preferences, in which also the involved patient organizations will have an  
11 important role.  
12  
13  
14

## 15 **DISCUSSION**

16 The CORFU study has the opportunity to investigate the prevalence, pathophysiological  
17 mechanisms, and prediction of long COVID, and its relationship with health-related quality  
18 of life. CORFU will aggregate data from seven existing COVID-19 cohorts and will enrich the  
19 data with prospective follow-up of long COVID outcomes and determinants up to a  
20 maximum of two years after acute infection. A prediction model and patient platform  
21 prototype will be developed to guide future patient care.  
22  
23

24 Estimation of the prevalence of long COVID symptoms up to two years after  
25 infection, will be based on the multidimensional CORFU questionnaire, including physical  
26 and psychological complaints after COVID-19. The extensive set of physical complaints gives  
27 the opportunity to study symptoms in great detail. The additional focus on psychological  
28 impact addresses the call to take COVID-19 psychopathology into account when designing  
29 new studies. It reflects the current knowledge that mental well-being is worse in patients  
30 who suffered from COVID-19 compared with healthy respondents and that there is a high  
31 rate of mental health complaints up to one year after acute infection.<sup>27 34</sup>  
32  
33

34 CORFU findings may be used to inform national and international guidelines on  
35 diagnostics, treatment and follow-up of long COVID and contribute to developing a (new)  
36 more accurate long COVID definition, likely differentiating long COVID phenotypes. Available  
37 guidelines and definitions on long COVID are currently, as expected, based on short-term  
38 follow-up studies, whereas CORFU will report long COVID symptoms up to two years after  
39 infection.<sup>1 35</sup>  
40

41 An important strength of the CORFU study is that data will be aggregated from seven  
42 cohorts of (former) COVID-19 patients. Due to mortality and non-response, the effective  
43 number might be slightly lower. Nevertheless, the large CORFU sample size allows for robust  
44 analysis. Furthermore, the difference in designs of the cohorts allows us to answer study  
45 aims for various subgroups (e.g. COVID-19 at home versus hospitalized (ward and/or ICU))  
46 and to test multiple, detailed, pathophysiological hypotheses, depending on the  
47 characteristics of the patients included in the participating cohorts, also related to COVID-19  
48 variants by using wave at the time of infection as a surrogate marker. Furthermore, the  
49 ability to aggregate data of multiple cohorts is an efficient way of (close) national  
50 collaboration which contributes to more robust and reliable findings compared with  
51 multiple, parallel, single cohort studies with smaller sample sizes.  
52  
53

54 Another strength is that CORFU will use data from a large control group of  
55 respondents who did not suffer from COVID-19. This allows the comparison of the  
56 prevalence of long COVID symptoms with the prevalence of these symptoms in the general  
57 Dutch, non-COVID-19 population, potentially highlighting the secondary impacts of the  
58 pandemic. This is a crucial comparison currently lacking in the majority (79%) of long COVID  
59  
60

1  
2  
3 research but required to identify and quantify attributable symptoms objectively.<sup>36</sup> For  
4 instance, the (social) restrictions may significantly impact the quality of life and (mental)  
5 well-being of the general population.<sup>13 27 37 38</sup> These factors need to be considered when  
6 analyzing and interpreting the CORFU findings. Lastly, as part of WP4, patients will receive  
7 personalized feedback on their own questionnaire outcomes and those of other patients in  
8 similar situations.  
9

10 Potential limitations of the CORFU study also merit consideration. Firstly, combining  
11 data from seven cohorts is challenging. As each cohort has specific study aims regarding the  
12 pathophysiological processes causing long COVID symptoms, not all cohorts collect the same  
13 (clinical) information from their participants. To ensure that data from all cohorts can be  
14 integrated and that between-cohort comparisons are possible, a minimal set of variables  
15 was (post-hoc) harmonized among the participating cohorts regarding background  
16 characteristics (e.g. socio-demographics, employment status, social, economic status,  
17 cultural background), comorbidities, and potential confounders. Furthermore, to optimize  
18 the data integration process, data received from the cohorts will be transferred into a  
19 machine-readable metadata scheme prior to merging the various datasets. Secondly, there  
20 will be an overrepresentation of (former) COVID-19 patients admitted to the hospital ward  
21 and/or ICU compared to those who suffered from COVID-19 at home. This affects  
22 estimations of long COVID prevalence, which can be evaluated by post-hoc stratification  
23 using community-based cases. The epidemiological basis used for the statistical models to  
24 develop prediction models is independent of in-/outpatient distribution and depends solely  
25 on the associations and interactions found within specific patient groups, as COVID-19  
26 severity will be added as a covariate. Moreover, analyses will be stratified by disease  
27 severity for subgroup-specific conclusions. Thirdly, especially in the first COVID-19 wave  
28 (March 1 – June 30, 2020) for non-hospitalized patients, not all suspected COVID-19 cases  
29 were tested due to capacity and test-material constraints in the Netherlands. However,  
30 these patients were included in (some of) the cohorts despite the lack of a confirmed  
31 infection. Therefore, findings might be based on suspected instead of confirmed infections.  
32 The same holds for controls not being tested due to the absence of symptoms. This will be  
33 described when reporting CORFU study results, and, when deemed relevant, additional  
34 (stratified) analyses will be conducted.  
35  
36  
37  
38  
39  
40  
41

## 42 **ETHICS AND DISSEMINATION**

43 This study will be conducted according to the latest update of the Declaration of Helsinki  
44 and is registered at ClinicalTrials.gov (NCT05240742). Ethics approval was obtained from the  
45 medical research ethics committee (MREC) of Maastricht University Medical Center+ and  
46 Maastricht University (committee reference number METC2021-2990) and the local MRECs  
47 of the participating cohorts (Supplementary table S1). Participants will be asked for written  
48 or digital informed consent, by the cohort in which they are participating, prior to  
49 administering the first CORFU questionnaire and will be informed that participation is  
50 voluntary. Data will be made available (Open Science/FAIR) subject to ethical approval and  
51 standard access and anonymization procedures.  
52  
53  
54  
55  
56  
57  
58  
59  
60



### Author contributions

BCTB, BH, BLJHK, CGD, EB, FAK, FWA, GJB, HC, ICCH, JAH, JWLC, KV, MCW and SMJK conceived and designed the study. CGD, DOK, EBNJJ, MSJNW, SCMNH and SMJK drafted the manuscript. BCTB, BH, BLJHK, EB, FAK, FWA, GJB, HC, ICCH, JAH, JWLC, KV, LHW, MCW, MDK, ML, RW and SS critically reviewed the manuscript. All authors read and approved the final manuscript.

### Funding

This work is supported by The Netherlands Organization for Health Research and Development (ZonMW), grant number 10430302110005, and an unrestricted grant has been received from the EuroQol Research Foundation. Individual COVID-19 cohorts contributing to the CORFU study may have been funded independently from this grant.

### Competing interests

BCTB, BH, BLJHK, GH, DOK, EB, EBNJJ, GJB, ICCH, JAH, JWLC, LHW, MSJNW, MCW, RW, SCMNH, SMJK, SS and BH declare no competing interests. FAK received research support from Bayer, BMS, Boehringer-Ingelheim, MSD, Daiichi-Sankyo, Actelion, Boston Scientific, The Netherlands Organization for Health Research and Development (ZonMW), The Dutch Thrombosis Association, and The Dutch Heart Foundation. FWA is supported by the National Institute of Health Research University College London Hospitals Biomedical Research Centre. For the CAPACITY-COVID cohort participating in CORFU, FWA and ML received support from Dutch Heart Foundation (2020B006 CAPACITY) and The Netherlands Organization for Health Research and Development (ZonMW) (grant number 10430102110006 DEFENCE). HC received support from Bayer, received consulting fees from Pfizer, Leo, Alveron, Viatrix, Astra Zeneca, and Galapagos, and has stock (options) in Coagulation Profile. KV has royalties or licences for Philips, Medtronic, Abbott, and Biosense Webster, received consulting fees from Philips, Biosense Webster, Boston Scientific, and Medtronic, and has a role in the European Heart Rhythm Association congress organization and digital committee. MDK received a presentation fee from Glaxo Smith Kline. ML is supported by the Alexandre Suerman Stipend of the University Medical Center Utrecht.

### ORCID iDs:

|                   |                     |
|-------------------|---------------------|
| MSJN Wintjens     | 0000-0002-7384-6002 |
| C Ghossein-Doha   | 0000-0003-4783-0987 |
| EBNJ Janssen      | 0000-0001-6916-7261 |
| DO Klein          | 0000-0003-0182-9569 |
| SCM Heemskerk     | 0000-0002-1320-8084 |
| FW Asselbergs     | 0000-0002-1692-8669 |
| E Birnie          | 0000-0002-4534-4857 |
| GJ Bonsel         | 0000-0002-8364-1086 |
| BCT van Bussel    | 0000-0003-1621-7848 |
| JWL Cals          | 0000-0001-9550-5674 |
| H ten Cate        | 0000-0001-7796-4463 |
| JA Haagsma        | 0000-0002-2055-548X |
| B Hemmen          | 0000-0003-3066-3254 |
| ICC van der Horst | 0000-0003-3891-8522 |
| BLJH Kietselaer   | 0000-0002-0096-8594 |

|    |               |                     |
|----|---------------|---------------------|
| 1  |               |                     |
| 2  |               |                     |
| 3  | FA Klok       | 0000-0001-9961-0754 |
| 4  | MD de Kruif   | 0000-0003-2883-9441 |
| 5  | M Linschoten  | 0000-0002-4541-080X |
| 6  | S van Santen  | NA                  |
| 7  | K Vernooy     | 0000-0002-8818-5964 |
| 8  | LH Willems    | 0000-0002-2728-9663 |
| 9  | R Westerborg  | NA                  |
| 10 | MC Warlé      | 0000-0002-1151-4571 |
| 11 | SMJ van Kuijk | 0000-0003-2796-729X |
| 12 |               |                     |
| 13 |               |                     |
| 14 |               |                     |
| 15 |               |                     |

## References

1. World Health Organization. A clinical case definition of post COVID-19 condition by a Delphi consensus: World Health Organization 2021.
2. Blomberg B, Mohn KG-I, Brokstad KA, et al. Long COVID in a prospective cohort of home-isolated patients. *Nat Med* 2021;27(9):1607-13.
3. Huang L, Yao Q, Gu X, et al. 1-year outcomes in hospital survivors with COVID-19: a longitudinal cohort study. *The Lancet* 2021;398(10302):747-58.
4. Peghin M, Palese A, Venturini M, et al. Post-COVID-19 symptoms 6 months after acute infection among hospitalized and non-hospitalized patients. *Clin Microbiol Infect* 2021;27(10):1507-13.
5. Lopez-Leon S, Wegman-Ostrosky T, Perelman C, et al. More than 50 Long-term effects of COVID-19: a systematic review and meta-analysis. *medRxiv* 2021
6. Ceban F, Ling S, Lui LMW, et al. Fatigue and Cognitive Impairment in Post-COVID-19 Syndrome: A Systematic Review and Meta-Analysis. *Brain Behav Immun* 2021
7. BATTERY S, Philip KEJ, Williams P, et al. Patient symptoms and experience following COVID-19: results from a UK-wide survey. *BMJ Open Respir Res* 2021;8(1)
8. Sudre CH, Murray B, Varsavsky T, et al. Attributes and predictors of long COVID. *Nat Med* 2021;27(4):626-31.
9. Han JH, Womack KN, Tenforde MW, et al. Associations between persistent symptoms after mild COVID-19 and long-term health status, quality of life, and psychological distress. *Influenza Other Respir Viruses* 2022
10. O'Kelly B, Vidal L, Avramovic G, et al. Assessing the impact of COVID-19 at 1-year using the SF-12 questionnaire: Data from the Anticipate longitudinal cohort study. *Int J Infect Dis* 2022;118:236-43.
11. Xie Y, Xu E, Bowe B, et al. Long-term cardiovascular outcomes of COVID-19. *Nat Med* 2022
12. Groff D, Sun A, Ssentongo AE, et al. Short-term and Long-term Rates of Postacute Sequelae of SARS-CoV-2 Infection: A Systematic Review. *JAMA Network Open* 2021;4(10):e2128568-e68.
13. Pedrosa AL, Bitencourt L, Fróes ACF, et al. Emotional, Behavioral, and Psychological Impact of the COVID-19 Pandemic. *Front Psychol* 2020;11:566212-12.
14. Nicola M, Alsaifi Z, Sohrabi C, et al. The socio-economic implications of the coronavirus pandemic (COVID-19): A review. *Int J Surg* 2020;78:185-93.
15. Wynberg E, van Willigen HDG, Dijkstra M, et al. Evolution of COVID-19 symptoms during the first 12 months after illness onset. *Clin Infect Dis* 2021
16. Taquet M, Dercon Q, Luciano S, et al. Incidence, co-occurrence, and evolution of long-COVID features: A 6-month retrospective cohort study of 273,618 survivors of COVID-19. *PLoS Med* 2021;18(9):e1003773.
17. Jovanoski N, Chen X, Becker U, et al. Severity of COVID-19 and adverse long-term outcomes: a retrospective cohort study based on a US electronic health record database. *BMJ Open* 2021;11(12):e056284.

18. Bai F, Tomasoni D, Falcinella C, et al. Female gender is associated with long COVID syndrome: a prospective cohort study. *Clin Microbiol Infect* 2021
19. Sigfrid L, Drake TM, Pauley E, et al. Long Covid in adults discharged from UK hospitals after Covid-19: A prospective, multicentre cohort study using the ISARIC WHO Clinical Characterisation Protocol. *medRxiv* 2021:2021.03.18.21253888.
20. Needham DM, Davidson J, Cohen H, et al. Improving long-term outcomes after discharge from intensive care unit: report from a stakeholders' conference. *Crit Care Med* 2012;40(2):502-9.
21. Wiertz CMH, Vints WAJ, Maas G, et al. COVID-19: Patient Characteristics in the First Phase of Postintensive Care Rehabilitation. *Arch Rehabil Res Clin Transl* 2021;3(2):100108.
22. Willems LH, Nagy M, Ten Cate H, et al. Sustained inflammation, coagulation activation and elevated endothelin-1 levels without macrovascular dysfunction at 3 months after COVID-19. *Thromb Res* 2022;209:106-14.
23. Linschoten M, Asselbergs FW. CAPACITY-COVID: a European Registry to determine the role of cardiovascular disease in the COVID-19 pandemic. *Eur Heart J* 2020;41(19):1795-96.
24. CAPACITY-COVID Collaborative Consortium and LEOSS Study Group. Clinical presentation, disease course, and outcome of COVID-19 in hospitalized patients with and without pre-existing cardiac disease: a cohort study across 18 countries. *Eur Heart J* 2022;43(11):1104-20.
25. Kruij M, Cannegieter SC, Ten Cate H, et al. Caging the dragon: Research approach to COVID-19-related thrombosis. *Res Pract Thromb Haemost* 2021;5(2):278-90.
26. Tas J, van Gassel RJJ, Heines SJH, et al. Serial measurements in COVID-19-induced acute respiratory disease to unravel heterogeneity of the disease course: design of the Maastricht Intensive Care COVID cohort (MaastricCht). *BMJ Open* 2020;10(9):e040175.
27. Long D, Haagsma JA, Janssen MF, et al. Health-related quality of life and mental well-being of healthy and diseased persons in 8 countries: Does stringency of government response against early COVID-19 matter? *SSM Popul Health* 2021;15:100913.
28. Leijte WT, Wagemaker NM, van Kraaij TD, et al. Sterfte en heropname na ziekenhuisopname met covid-19. *Ned Tijdschr Geneesk* 2020
29. Wilkinson MD, Dumontier M, Aalbersberg IJ, et al. The FAIR Guiding Principles for scientific data management and stewardship. *Scientific Data* 2016;3(1):160018.
30. Sterne JA, White IR, Carlin JB, et al. Multiple imputation for missing data in epidemiological and clinical research: potential and pitfalls. *BMJ* 2009;338:b2393.
31. Castela Forte J, Perner A, van der Horst ICC. The use of clustering algorithms in critical care research to unravel patient heterogeneity. *Intensive Care Med* 2019;45(7):1025-28.
32. Wynants L, Van Calster B, Collins GS, et al. Prediction models for diagnosis and prognosis of covid-19: systematic review and critical appraisal. *BMJ* 2020;369:m1328.
33. Riley RD, Snell KI, Ensor J, et al. Minimum sample size for developing a multivariable prediction model: PART II - binary and time-to-event outcomes. *Stat Med* 2019;38(7):1276-96.
34. Mazza MG, Palladini M, De Lorenzo R, et al. One-year mental health outcomes in a cohort of COVID-19 survivors. *J Psychiatr Res* 2021;145:118-24.
35. National Institute for Health and Care Excellence, Scottish Intercollegiate Guidelines Network, Royal College of General Practitioners. COVID-19 rapid guideline: managing the long-term effects of COVID-19, 2021.
36. Amin-Chowdhury Z, Ladhani SN. Causation or confounding: why controls are critical for characterizing long COVID. *Nat Med* 2021;27(7):1129-30.
37. May T, Aughterson H, Fancourt D, et al. 'Stressed, uncomfortable, vulnerable, neglected': a qualitative study of the psychological and social impact of the COVID-19 pandemic on UK frontline keyworkers. *BMJ Open* 2021;11(11):e050945.
38. Epifanio MS, Andrei F, Mancini G, et al. The Impact of COVID-19 Pandemic and Lockdown Measures on Quality of Life among Italian General Population. *J Clin Med* 2021;10(2)

1  
2  
3 **Figure 1. Overview of the participating COVID-19 cohorts in the CORFU study**

4 The source population included in the individual cohorts is an estimate as of May 2022. The total number of  
5 CORFU study participants might not add up to the total source population (n=12,631) due to non-survivors,  
6 participants included in multiple cohorts and participants who might not want to participate in the CORFU  
7 study. \*At the time of manuscript preparation, prospective inclusion is ongoing in five cohorts: Adelante,  
8 CAPACITY-COVID, DC&TC, ELVIS and MaastrICht cohort.  
9

10 **Abbreviations:** CAPACITY-COVID: Cardiac complications in patients with COVID-19 cohorts; CORADS: COVID-19  
11 Reporting and Data System Score; COVAS: Bernhoven Early detection of Vascular damage after COVID-19  
12 cohort; CT: Computed Tomography; DC&TC cohort: Dutch COVID & Thrombosis Consortium cohort; ECG:  
13 Electrocardiogram; ELVIS: ZuydErLand COVID-19 regiStry; ICU: Intensive Care Unit; MaastrICht: Maastricht  
14 Intensive Care COVID cohort; MRI: Magnetic Resonance Imaging; NSAID: Nonsteroidal Anti-Inflammatory  
15 Drugs; PCR: Polymerase Chain Reaction; POPCOrn: POPulation health impact of the COVID-19 pandemic;  
16 PROMS: Patient-Reported Outcome Measures; VTE: venous thrombo-embolic.  
17  
18  
19  
20  
21  
22  
23  
24  
25  
26  
27  
28  
29  
30  
31  
32  
33  
34  
35  
36  
37  
38  
39  
40  
41  
42  
43  
44  
45  
46  
47  
48  
49  
50  
51  
52  
53  
54  
55  
56  
57  
58  
59  
60

For peer review only

# CORona Follow-Up (CORFU) study

**Adelante<sup>21</sup>**  
(n=158)\*

**CAPACITY-  
COVID<sup>23,24</sup>**  
(n=5,575)\*

**COVAS<sup>22</sup>**  
(n=203)

**DC&TC<sup>25</sup>**  
(n=350, nested in  
CAPACITY-COVID)\*

**ELVIS<sup>28</sup>**  
(n=2,543)\*

**MaastrICCh<sup>26</sup>**  
(n=509)\*

**POPCOrn<sup>27</sup>**  
(n=3,293)

## Aim

Investigate the course of functioning after COVID-19 disease in patients who were admitted for inpatient or outpatient rehabilitation after discharge and investigate well-being of their relatives

## Study population

All patients who:  
- were admitted for inpatient rehabilitation at the Adelante rehabilitation center after ICU/hospital discharge; or  
- patients who recovered at home and were in need of outpatient rehabilitation

## Available data

- Patient characteristics
- Functional characteristics
- Environmental factors
- Personal factors
- Rehabilitation characteristics

## Study design

Aligned with:  
- CAPACITY-COVID  
- DC&TC  
- MaastrICCh

Similar to:

- COVAS
- ELVIS
- POPCOrn

## Aim

Investigate the role of cardiovascular disease in the COVID-19 pandemic

## Study population

Patients admitted to the hospital with (highly suspected) COVID-19

## Available data

- Patient characteristics
- Cardiovascular risk factors
- Use of cardiovascular medication
- Use of NSAIDs
- Cardiovascular biomarkers
- ECGs
- Echocardiographical parameters
- In-hospital outcomes

## Study design

Aligned with:  
- Adelante  
- DC&TC  
- MaastrICCh

Similar to:

- COVAS
- ELVIS
- POPCOrn

## Aim

Investigate a possible relationship between increased inflammation parameters and persistent thrombo-inflammatory and microvascular dysfunction and respiratory symptoms in COVID-19 disease

## Study population

All patients admitted to the ward or ICU in Bernhoven Hospital who were:  
- confirmed COVID-19 (positive PCR) or  
- patients who were COVID-19 positive in the emergency ward and recovered at home

## Available data

- Patient characteristics
- Carotid Artery Reactivity test
- Microvascular dysfunction markers in blood plasma
- Inflammatory plasma cytokines
- Coagulation factors and inhibitors

## Study design

Similar to all cohorts

## Aim

Investigate the incidence of post VTE complications (specifically: post thrombotic syndrome, chronic thromboembolic disease and chronic thromboembolic pulmonary hypertension) and their impact on outcomes in COVID-19 survivors

## Study population

Patients admitted to the hospital between March 1, 2020 and January 1, 2021 who:  
- suffered from confirmed COVID-19 (using CT or echocardiography); and  
- had a confirmed VTE

## Available data

- Patient characteristics
- Biomarkers of inflammation and coagulation
- Imaging and tissue damage during first episode of COVID-19 disease
- PROMS
- Functional tests
- Follow-up moments (3 months, 1 year, 2 years)

## Study design

Aligned with:  
- Adelante  
- CAPACITY-COVID  
- MaastrICCh

Similar to:

- COVAS
- ELVIS
- POPCOrn

## Aim

Investigate complications after COVID-19 hospitalization, mortality after hospital discharge and readmission (indications and risk factors)

## Study population

All patients admitted to Zuyderland Medical Center who suffered from confirmed COVID-19 (positive PCR or a positive scored CT scan of the chest (4 or 5 on CORADS by a radiologist))

## Available data

- Patient characteristics

## Study design

Similar to all cohorts

## Aim

Unravel clinical heterogeneity of COVID-19 disease during ICU stay and follow-up using serial data

## Study population

All patients admitted to the ICU in Maastricht University Medical Center+ who:  
- suffered from confirmed COVID-19 (positive PCR or a positive scored CT scan of the chest (4 or 5 on CO-RADS by a radiologist); and  
- were intubated; and  
- were mechanically ventilated

## Available data

- Patient characteristics
- Serial data (medication use, complications, severity of disease, multi organ failure)
- Respiratory parameters
- Markers of coagulation
- Cardiovascular variables
- Metabolic variables
- Follow-up moments (3 months, 1 year)

## Study design

Aligned with:  
- Adelante  
- DC&TC  
- CAPACITY-COVID

Similar to:

- COVAS
- ELVIS
- POPCOrn

## Aim

Investigate effects of COVID-19 on health-related quality of life, mental health and wellbeing of the general population and investigate the role of individual determinants of health, health system features and government response against COVID-19

## Study population

- Patients (18-75 years) who suffered from (suspected or confirmed) COVID-19 (including patients who recovered at home)  
- People who did not suffer from COVID-19 will be used as a control group

## Available data

- Patient/Control characteristics
- Risk factors
- Use of health services
- Barriers to healthcare
- Care avoiders among this population
- Living situation

## Study design

Similar to all cohorts

1  
2  
3  
4  
5  
6  
7  
8  
9  
10  
11  
12  
13  
14  
15  
16  
17  
18  
19  
20  
21  
22  
23  
24  
25  
26  
27  
28  
29  
30  
31  
32  
33  
34  
35  
36  
37  
38  
39  
40  
41  
42  
43  
44  
45  
46  
47  
48  
49  
50  
51  
52  
53  
54  
55  
56  
57  
58  
59  
60

## SUPPLEMENTARY TABLE

### Prevalence, pathophysiology, prediction and health-related quality of life of long COVID: design of the longitudinal multiple cohort CORona Follow Up (CORFU) study

**Supplementary table S1.** Overview of ethics approval information per cohort

| Cohort acronym | Corresponding MREC                                                       | MREC Registration ID                                                                             | Additional cohort registration               |
|----------------|--------------------------------------------------------------------------|--------------------------------------------------------------------------------------------------|----------------------------------------------|
| Adelante       | MREC Zuyderland                                                          | METCZ20200086                                                                                    | n.a.                                         |
| CAPACITY-COVID | MREC Utrecht                                                             | CAPACITY 1: 20-161/C<br>CAPACITY 2: 21-097/M<br>DEFENCE: 21-532/C                                | ClinicalTrials.gov:<br>NCT04325412           |
| COVAS          | MREC Oost Nederland                                                      | NL74101.091.20                                                                                   | n.a.                                         |
| DC&TC          | n.a.                                                                     | n.a.                                                                                             | n.a.                                         |
| ELVIS          | MREC Z - Zuyderland                                                      | METCZ20200121                                                                                    | n.a.                                         |
| MaastrICht     | MREC Maastricht University<br>Medical Center+ / Maastricht<br>University | Follow Up cohort: 2020-2368-A-2;<br>2020-2368-A-1; 2020-2368<br>Initial cohort: 2020-1565/300523 | The Netherlands<br>Trial Register:<br>NL8613 |
| POPCOrn        | MREC Erasmus Medical<br>Center, Rotterdam                                | MEC-2020-0266                                                                                    | n.a.                                         |

**Abbreviations:** CAPACITY-COVID: Cardiac complications in patients with COVID-19 cohorts; COVAS: Bernhoven Early detection of Vascular damage after COVID-19 cohort; DC&TC cohort: Dutch COVID & Thrombosis Consortium cohort; ELVIS: ZuydErLand COVID-19 regiStry; MaastrICht: Maastricht Intensive Care COVID cohort; MREC: Medical Research Ethics Committee; n.a.: not applicable; POPCOrn: POPulation health impact of the COVID-19 pandemic

# BMJ Open

## Prevalence, pathophysiology, prediction and health-related quality of life of long COVID: study protocol of the longitudinal multiple cohort CORona Follow Up (CORFU) study

|                               |                                                                                                                                                                                                                                                                                                                                                                                                                                                                                                                                                                                                                                                                                                                                                                                                                                                                                                                                                                                                                                                                                                                                                                                                                                                                                                                                                                                                                                                                                                                                                                                                                                                                                                                                                                                                                                                                                                                                                                                                                                                                                                                                                                                                                                                                                                    |
|-------------------------------|----------------------------------------------------------------------------------------------------------------------------------------------------------------------------------------------------------------------------------------------------------------------------------------------------------------------------------------------------------------------------------------------------------------------------------------------------------------------------------------------------------------------------------------------------------------------------------------------------------------------------------------------------------------------------------------------------------------------------------------------------------------------------------------------------------------------------------------------------------------------------------------------------------------------------------------------------------------------------------------------------------------------------------------------------------------------------------------------------------------------------------------------------------------------------------------------------------------------------------------------------------------------------------------------------------------------------------------------------------------------------------------------------------------------------------------------------------------------------------------------------------------------------------------------------------------------------------------------------------------------------------------------------------------------------------------------------------------------------------------------------------------------------------------------------------------------------------------------------------------------------------------------------------------------------------------------------------------------------------------------------------------------------------------------------------------------------------------------------------------------------------------------------------------------------------------------------------------------------------------------------------------------------------------------------|
| Journal:                      | <i>BMJ Open</i>                                                                                                                                                                                                                                                                                                                                                                                                                                                                                                                                                                                                                                                                                                                                                                                                                                                                                                                                                                                                                                                                                                                                                                                                                                                                                                                                                                                                                                                                                                                                                                                                                                                                                                                                                                                                                                                                                                                                                                                                                                                                                                                                                                                                                                                                                    |
| Manuscript ID                 | bmjopen-2022-065142.R1                                                                                                                                                                                                                                                                                                                                                                                                                                                                                                                                                                                                                                                                                                                                                                                                                                                                                                                                                                                                                                                                                                                                                                                                                                                                                                                                                                                                                                                                                                                                                                                                                                                                                                                                                                                                                                                                                                                                                                                                                                                                                                                                                                                                                                                                             |
| Article Type:                 | Protocol                                                                                                                                                                                                                                                                                                                                                                                                                                                                                                                                                                                                                                                                                                                                                                                                                                                                                                                                                                                                                                                                                                                                                                                                                                                                                                                                                                                                                                                                                                                                                                                                                                                                                                                                                                                                                                                                                                                                                                                                                                                                                                                                                                                                                                                                                           |
| Date Submitted by the Author: | 06-Oct-2022                                                                                                                                                                                                                                                                                                                                                                                                                                                                                                                                                                                                                                                                                                                                                                                                                                                                                                                                                                                                                                                                                                                                                                                                                                                                                                                                                                                                                                                                                                                                                                                                                                                                                                                                                                                                                                                                                                                                                                                                                                                                                                                                                                                                                                                                                        |
| Complete List of Authors:     | <p>Ghossein-Doha, Chahinda; Maastricht UMC+, Department of Cardiology; Maastricht University, Cardiovascular Research Institute Maastricht (CARIM)</p> <p>Wintjens, Marieke SJN; Maastricht UMC+, Department of Clinical Epidemiology and Medical Technology Assessment; Maastricht UMC+, Intensive Care Medicine</p> <p>Janssen, Emma BNJ; Maastricht UMC+, Department of Obstetrics and Gynaecology; Maastricht University, Cardiovascular Research Institute Maastricht (CARIM)</p> <p>Klein, Dorthe; Maastricht UMC+, Department of Clinical Epidemiology and Medical Technology Assessment; Maastricht University, Care and Public Health Research Institute (CAPHRI)</p> <p>Heemskerk, Stella; Maastricht UMC+, Department of Clinical Epidemiology and Medical Technology Assessment; Maastricht University, Care and Public Health Research Institute (CAPHRI)</p> <p>Asselbergs, Folkert; University Medical Centre Utrecht, Department of Cardiology; University College London, Institute of Cardiovascular Science, Faculty of Population Health Sciences, Health Data Research UK and Institute of Health Informatics</p> <p>Birnie, Erwin ; EuroQol Research Foundation; University Medical Centre Groningen, Department of Genetics</p> <p>Bonsel, Gouke J.; EuroQol Research Foundation</p> <p>van Bussel, Bas; Maastricht UMC+, Department of Intensive Care; Maastricht University, Care and Public Health Research Institute (CAPHRI)</p> <p>Cals, Jochen; Maastricht University, Department of Family Medicine; Maastricht University, Care and Public Health Institute (CAPHRI)</p> <p>Ten Cate, Hugo; Maastricht UMC+, Department of Biochemistry, Department of Internal Medicine, Thrombosis Expert Centre; Maastricht University, Department of Biochemistry, Cardiovascular Research Institute Maastricht (CARIM)</p> <p>Haagsma, Juanita; Erasmus MC, Department of Public Health</p> <p>Hemmen, Bena; Maastricht University, Department of Rehabilitation Medicine, Functioning, Participation &amp; Rehabilitation; Maastricht University, Care and Public Health Institute (CAPHRI)</p> <p>van der Horst, Iwan; Maastricht University Medical Centre+, Department of Intensive Care; Maastricht University, Cardiovascular Research Institute Maastricht (CARIM)</p> |

|                                 |                                                                                                                                                                                                                                                                                                                                                                                                                                                                                                                                                                                                                                                                                                                                                                                                                                                                                                                                                                                                                                                                                                                                                                                    |
|---------------------------------|------------------------------------------------------------------------------------------------------------------------------------------------------------------------------------------------------------------------------------------------------------------------------------------------------------------------------------------------------------------------------------------------------------------------------------------------------------------------------------------------------------------------------------------------------------------------------------------------------------------------------------------------------------------------------------------------------------------------------------------------------------------------------------------------------------------------------------------------------------------------------------------------------------------------------------------------------------------------------------------------------------------------------------------------------------------------------------------------------------------------------------------------------------------------------------|
|                                 | Kietselaer, Bastiaan; Zuyderland Medical Centre Heerlen, Department of Cardiology; Mayo Clinic, Department of Cardiovascular Disease<br>Klok, Frederikus; Leiden University Medical Center, Department of Thrombosis and Hemostasis<br>de Kruif, Martijn; Zuyderland Medical Centre Heerlen, Department of Pulmonology<br>Linschoten, Marijke; University Medical Centre Utrecht, Department of Cardiology; Netherlands Heart Institute<br>van Santen, Susanne; Maastricht UMC+, Department of Intensive Care; Maastricht University, Care and Public Health Institute (CAPHRI)<br>Vernooy, Kevin; Maastricht UMC+, Department of Cardiology; Maastricht University, Cardiovascular Research Institute Maastricht (CARIM)<br>Willems, Loes H.; Radboudumc Radboud Institute for Health Sciences, Department of Surgery<br>Westerborg, Rosa; Zuyderland Medical Centre Heerlen, Department of Pulmonology<br>Warle, Michiel; Radboudumc Radboud Institute for Health Sciences, Department of Surgery<br>van Kuijk, Sander; Maastricht UMC+, Department of Clinical Epidemiology and Medical Technology Assessment; Maastricht University, Care and Public Health Institute (CAPHRI) |
| <b>Primary Subject Heading</b>: | Epidemiology                                                                                                                                                                                                                                                                                                                                                                                                                                                                                                                                                                                                                                                                                                                                                                                                                                                                                                                                                                                                                                                                                                                                                                       |
| Secondary Subject Heading:      | Public health, Infectious diseases                                                                                                                                                                                                                                                                                                                                                                                                                                                                                                                                                                                                                                                                                                                                                                                                                                                                                                                                                                                                                                                                                                                                                 |
| Keywords:                       | COVID-19, EPIDEMIOLOGY, Protocols & guidelines < HEALTH SERVICES ADMINISTRATION & MANAGEMENT, Public health < INFECTIOUS DISEASES                                                                                                                                                                                                                                                                                                                                                                                                                                                                                                                                                                                                                                                                                                                                                                                                                                                                                                                                                                                                                                                  |
|                                 |                                                                                                                                                                                                                                                                                                                                                                                                                                                                                                                                                                                                                                                                                                                                                                                                                                                                                                                                                                                                                                                                                                                                                                                    |

SCHOLARONE™  
Manuscripts



1  
2  
3 **Prevalence, pathophysiology, prediction and health-related quality of life of long COVID:**  
4 **study protocol of the longitudinal multiple cohort CORona Follow Up (CORFU) study**  
5  
6

7 **AUTHORS AND AFFILIATIONS**

8 C Ghossein-Doha\*, MSJN Wintjens\*, EBNJ Janssen, DO Klein, SCM Heemskerk, FW  
9 Asselbergs, E Birnie, GJ Bonsel, BCT van Bussel, JWL Cals, H ten Cate, JA Haagsma, B  
10 Hemmen, ICC van der Horst, BLJH Kietselaer, FA Klok, MD de Kruif, M Linschoten, S van  
11 Santen, K Vernooy, LH Willems, R Westerborg, MC Warlé, SMJ van Kuijk  
12  
13

14 \* Equal contribution  
15

16 **Corresponding author:** SMJ van Kuijk, Department of Clinical Epidemiology and Medical  
17 Technology Assessment, Care and Public Health Research Institute (CAPHRI), Maastricht  
18 University Medical Center+, Maastricht, P.O. Box 5800, 6202 AZ, The Netherlands,  
19 [sander.van.kuijk@mumc.nl](mailto:sander.van.kuijk@mumc.nl)  
20  
21

22  
23 **Co-authors:**

24 Chahinda Ghossein-Doha  
25 Department of Obstetrics and Gynaecology, Cardiovascular Research Institute Maastricht  
26 (CARIM), Maastricht University Medical Center+, Maastricht, The Netherlands.  
27 Department of Cardiology, Cardiovascular Research Institute Maastricht (CARIM),  
28 Maastricht University Medical Center+, Maastricht, The Netherlands.  
29

30  
31 Marieke SJN Wintjens

32 Department of Clinical Epidemiology and Medical Technology Assessment, Care and Public  
33 Health Research Institute (CAPHRI), Maastricht University Medical Center+, Maastricht, The  
34 Netherlands.  
35 Department of Intensive Care Medicine, Care and Public Health Research Institute (CAPHRI),  
36 Maastricht University Medical Center+, Maastricht, The Netherlands.  
37  
38

39  
40 Emma BNJ Janssen

41 Department of Obstetrics and Gynaecology, Cardiovascular Research Institute Maastricht  
42 (CARIM), Maastricht University Medical Center+, Maastricht, The Netherlands.  
43 Department of Clinical Epidemiology and Medical Technology Assessment, Care and Public  
44 Health Research Institute (CAPHRI), Maastricht University Medical Center+, Maastricht, The  
45 Netherlands.  
46  
47

48  
49 Dorthe O Klein

50 Department of Clinical Epidemiology and Medical Technology Assessment, Care and Public  
51 Health Research Institute, Maastricht University Medical Center+, Maastricht, The  
52 Netherlands.  
53

54  
55 Stella CM Heemskerk

56 Department of Clinical Epidemiology and Medical Technology Assessment, Care and Public  
57 Health Research Institute (CAPHRI), Maastricht University Medical Center+, Maastricht, The  
58 Netherlands.  
59  
60

1  
2  
3 Folkert W Asselbergs

4 Department of Cardiology, University Medical Center Utrecht, Utrecht University, The  
5 Netherlands.

6  
7 Institute of Cardiovascular Science, Faculty of Population Health Sciences, University College  
8 London, London, United Kingdom.

9 Health Data Research UK and Institute of Health Informatics, University College London,  
10 London, United Kingdom.  
11

12  
13 Erwin Birnie

14 EuroQol Group Executive Office, Rotterdam, The Netherlands.

15 Department of Genetics, University Medical Center Groningen, University of Groningen,  
16 Groningen, The Netherlands  
17

18  
19 Gouke J Bonsel

20 EuroQol Group Executive Office, Rotterdam, The Netherlands.  
21

22  
23 Bas CT van Bussel

24 Department of Intensive Care Medicine, Care and Public Health Research Institute (CAPHRI),  
25 Maastricht University Medical Center+, Maastricht, The Netherlands.  
26

27  
28 Jochen WL Cals

29 Department of Family Medicine, Care and Public Health Research Institute (CAPHRI),  
30 Maastricht University, Maastricht, The Netherlands.  
31

32  
33 Hugo ten Cate

34 Department of Biochemistry, Cardiovascular Research Institute Maastricht (CARIM),  
35 Maastricht University, Maastricht, The Netherlands.

36 Department of Internal Medicine, Maastricht University Medical Center+, Maastricht, The  
37 Netherlands.  
38

39 Thrombosis Expert Centre Maastricht, Maastricht University Medical Center+, Maastricht,  
40 The Netherlands.  
41

42  
43 Juanita A Haagsma

44 Department of Public Health, Erasmus University Medical Center Rotterdam, Rotterdam,  
45 The Netherlands.  
46

47  
48 Bena Hemmen

49 Department of Rehabilitation Medicine, Functioning, Participation & Rehabilitation, Care  
50 and Public Health Research Institute (CAPHRI), Maastricht University, The Netherlands.

51 Adelante Centre of Expertise in Rehabilitation and Audiology, Hoensbroek, The Netherlands.  
52

53  
54 Iwan CC van der Horst

55 Department of Intensive Care Medicine, Cardiovascular Research Institute Maastricht  
56 (CARIM), Maastricht University Medical Center+, Maastricht, The Netherlands.  
57

58  
59 Bas LJH Kietselaer

60 Department of Cardiovascular Diseases, Mayo Clinic, Rochester, Minnesota, Unites States.

1  
2  
3 Department of Cardiology, Zuyderland Medical Center, Heerlen, The Netherlands.  
4

5  
6 Frederikus A Klok

7 Department of Medicine - Thrombosis and Hemostasis, Leiden University Medical Center,  
8 Leiden, The Netherlands.  
9

10  
11 Martijn D de Kruif

12 Department of Pulmonology, Zuyderland Medical Center, Heerlen, The Netherlands.  
13

14  
15 Marijke Linschoten

16 Department of Cardiology, University Medical Center Utrecht, Utrecht University, The  
17 Netherlands; Netherlands Heart Institute, Utrecht, The Netherlands.  
18

19  
20 Susanne van Santen

21 Department of Intensive Care Medicine, Care and Public Health Research Institute (CAPHRI),  
22 Maastricht University Medical Center+, Maastricht, The Netherlands.  
23

24  
25 Kevin Vernooij

26 Department of Cardiology, Cardiovascular Research Institute Maastricht (CARIM),  
27 Maastricht University Medical Center+, Maastricht, The Netherlands.  
28

29  
30 Loes H Willems

31 Department of Surgery, Radboud Institute of Health Sciences (RIHS), Radboud University  
32 Medical Center, Nijmegen, The Netherlands  
33

34  
35 Rosa Westerborg

36 Department of Pulmonology, Zuyderland Medical Center, Heerlen, The Netherlands.  
37

38  
39 Michiel C Warlé

40 Department of Surgery, Radboud Institute of Health Sciences (RIHS), Radboud University  
41 Medical Center, Nijmegen, The Netherlands.  
42

43  
44 Sander MJ van Kuijk

45 Department of Clinical Epidemiology and Medical Technology Assessment, Care and Public  
46 Health Research Institute (CAPHRI), Maastricht University Medical Center+, Maastricht, The  
47 Netherlands  
48

49  
50 **Word count:** 4.086

51 **Keywords:** Long COVID, PACS (Post-Acute sequelae SARS-CoV-2 infection), protocol,  
52 multiple cohort study, epidemiology, prediction model  
53  
54  
55  
56  
57  
58  
59  
60

## ABSTRACT

**Introduction** The variety, time patterns and long term prognosis of persistent COVID-19 symptoms (long COVID) in patients who suffered from mild to severe acute COVID-19 are incompletely understood. Cohort studies will be combined to describe the prevalence of long COVID symptoms, and to explore the pathophysiological mechanisms and impact on health-related quality of life. A prediction model for long COVID will be developed and internally validated to guide care in future patients.

**Methods and analysis** Data from seven COVID-19 cohorts will be aggregated in the longitudinal multiple cohort CORona Follow Up (CORFU) study. CORFU includes Dutch patients who suffered from COVID-19 at home, were hospitalized without or with intensive care unit treatment, needed inpatient or outpatient rehabilitation, and controls who did not suffer from COVID-19. Individual cohort study designs were aligned and follow-up has been synchronized. Cohort participants will be followed up for a maximum of 24 months after acute infection. Next to the clinical characteristics measured in individual cohorts, the CORFU questionnaire on long COVID outcomes and determinants will be administered digitally at 3, 6, 12, 18 and 24 months after the infection. The primary outcome is the prevalence of long COVID symptoms up to two years after acute infection. Secondary outcomes are health-related quality of life (e.g. EQ-5D), physical functioning, and the prevalence of thromboembolic complications, respiratory complications, cardiovascular diseases and endothelial dysfunction. A prediction model and a patient platform prototype will be developed.

**Ethics and dissemination** Approval was obtained from the medical research ethics committee of Maastricht University Medical Center+ and Maastricht University (METC 2021-2990) and local committees of the participating cohorts. The project is supported by ZonMW and EuroQol Research Foundation. Results will be published in open access peer-reviewed scientific journals and presented at (inter)national conferences.

**Trial registration number** ClinicalTrials.gov Identifier: NCT05240742

## Article summary

### Strengths and limitations of this study

- ◆ Survivors from seven existing COVID-19 cohorts will be asked to participate in CORFU; clinical data will be aggregated and enriched with results from questionnaires on symptoms, health-related quality of life and societal impact at synchronized follow-up moments to estimate the prevalence and pathophysiological mechanisms of long COVID, the impact on health-related quality of life, and their key determinants.
- ◆ A control group of Dutch participants from the general population, who did not suffer from COVID-19, will be included for comparison with regard to the prevalence and health-related quality of life.
- ◆ The heterogeneous cohort populations enable CORFU to investigate study aims in various subgroups (e.g. home-isolated versus hospitalized patients) and test pathophysiological hypotheses.
- ◆ An overrepresentation of (former) COVID-19 patients admitted to the hospital (ward or intensive care unit) might exist, potentially resulting in overrepresentation of more severe cases of long COVID, all of which will be considered in the analysis and presentation.

## INTRODUCTION

The World Health Organization (WHO) defines the post-COVID-19 condition, also known as long COVID, as a condition that occurs three months from the onset of infection, with symptoms that last for at least two months and are not explained by an alternative diagnosis.<sup>1</sup> The prevalence of long COVID symptoms varies in literature, ranging from 40% and 68% six months after COVID-19 diagnosis and up to 49% after twelve months.<sup>2-4</sup> Frequently reported symptoms include fatigue, shortness of breath, headache, cognitive impairment (e.g. concentration problems), muscle weakness and joint stiffness.<sup>5-8</sup> Persistent long COVID symptoms are associated with poorer health-related quality of life.<sup>9 10</sup> Furthermore, there is an increased risk of incident cardiovascular complaints and cardiovascular diseases for people who suffered from COVID-19 beyond the first month of infection.<sup>11 12</sup> Next to the physical and mental symptoms of long COVID, there is a psychological and emotional impact which might be induced by the social restrictions and financial impact (including income uncertainty) during the pandemic.<sup>13 14</sup>

Long COVID occurs both in patients with mild and with severe acute course. So far, the severity of the acute infection seems related to the risk of long COVID symptoms.<sup>15-17</sup> Additional factors affecting the risk of long COVID are the presence of one or more pre-existent comorbidities and being a middle-aged female.<sup>16 18 19</sup> Whether the type of severe acute respiratory syndrome coronavirus 2 (SARS-CoV-2) strain relates to long COVID is unknown.

In patients suffering from critical COVID-19 in the ICU, long COVID symptoms may co-exist with, or be indistinguishable from, the post-IC syndrome (PICS), defined as newly emerging physical, cognitive, or mental limitations after suffering from severe disease during ICU stay.<sup>20</sup>

Due to the novelty of COVID-19, studies focus on short term physical functioning and mental well-being. However, less is known about persisting COVID-19 symptoms up to two years after acute infection, and the factors determining prognosis (if any). More knowledge will facilitate long COVID (health)care and follow-up (e.g. specific services such as (lung)rehabilitation and occupational support) for specific patient groups, guided by prognostic information. This knowledge may translate into national and international guidelines on the prevention, diagnosis, and treatment of long COVID.

This paper describes the protocol of the CORona Follow Up (CORFU) study: a national longitudinal, multiple cohort study that aggregates data of existing cohorts and enriches these data with repeated digital follow-up questionnaires on long COVID symptoms and health-related quality of life up to two years after the first infection. Five aims, summarized in four work packages (WP), have been formulated:

- ◆ WP1:
  - a) To describe the prevalence, severity, time patterns and duration of long COVID symptoms up to two years after acute infection and their relationship with health-related quality of life.
  - b) To describe the received rehabilitation and paramedical support in relation to the persisting symptoms and health-related quality of life.
- ◆ WP2:

To investigate the pathophysiological mechanisms that may cause long COVID symptoms and the role of vulnerability/resilience factors.

- ◆ WP3:  
To develop and validate a prediction model for the persistence of symptoms, stratified by severity of COVID-19.
- ◆ WP4 (in collaboration with EuroQol Research Foundation):  
Develop a patient platform prototype where patients can digitally consult their reported outcomes, compare them with previous outcomes, relate to reference information, and find reported information that fits their situation.

## METHODS AND ANALYSIS

### Study design

The CORFU study is a longitudinal multiple cohort study that aggregates data of seven existing Dutch COVID-19 cohorts, prospectively complemented with routinely collected outcome data on long COVID, with a maximum follow-up of 24 months after initial infection. Data will be collected between October 1, 2021 and December 31, 2022.

All cohorts were initiated and designed to conduct COVID-19 research. Six cohorts will collect data according to their individual clinical focus (Figure 1). In addition, participants from the community-based POPulation health impact of the COVID-19 pandemic (POPCOrn) cohort will serve as a control group as this cohort partly consists of controls who did not suffer from COVID-19. However, at present, many of the POPCOrn participants could have suffered from (mild) COVID-19. Therefore, all POPCOrn participants will be asked repeatedly to report whether or not they suffered from (confirmed or suspected) COVID-19 and only the participants who did not suffer from COVID-19 will serve as a control. In the POPCOrn cohort, similar outcome data will be collected as in the other participating cohorts. As CORFU is open to new collaborations, it is likely that additional cohorts will join CORFU in the future. Participation of new cohorts will be reported when presenting the CORFU study findings.

The cohort-specific follow-up measurements will be complemented by a repeatedly administered CORFU questionnaire covering the full array of long COVID symptoms, health-related quality of life effects, and their key determinants. Furthermore, (clinical) data that has already been collected in the participating cohorts during the acute COVID-19 stage will be used to investigate the CORFU study aims.

### Participants

The study population consists of Dutch (former) COVID-19 survivors and non-COVID-19 controls, who have been included in one of the cohorts and categorized into five subgroups:

- ◆ Patients who suffered from (confirmed) COVID-19 admitted to the hospital ward;
- ◆ Patients who suffered from (confirmed) COVID-19 admitted to the ICU;
- ◆ Patients who suffered from (confirmed or suspected) COVID-19 at home;
- ◆ Patients who suffered from (confirmed) COVID-19 and needed inpatient or outpatient rehabilitation after infection at home or in the hospital (ward and/or ICU);
- ◆ Controls who did not suffer from (confirmed or suspected) COVID-19.

Adult participants ( $\geq 18$  years) with confirmed or suspected COVID-19 and non-COVID-19 controls who sufficiently master the Dutch language will be eligible for inclusion in the CORFU study. No additional exclusion criteria will be used. In addition to provided consent or no declared objection for initial cohort participation, all participants will be asked to give

1  
2  
3 written and/or digital informed consent prior to the first CORFU follow-up questionnaire (if  
4 not already covered by the specific cohort inclusion scheme).  
5

### 6 7 **Data sources: COVID-19 cohorts**

8 Data will be derived from the following seven COVID-19 cohorts:

- 9 ◆ Adelante cohort<sup>21</sup>;
- 10 ◆ Bernhoven early detection of vascular damage after COVID-19 (COVAS) cohort<sup>22</sup>;
- 11 ◆ Cardiac complications in patients with COVID-19 (CAPACITY-COVID) cohort<sup>23 24</sup>;
- 12 ◆ Dutch COVID and Thrombosis Consortium (DC&TC) cohort<sup>25</sup>;
- 13 ◆ MaastrICht cohort<sup>26</sup>;
- 14 ◆ POPulation health impact of the COVID-19 pandemic (POPCOrn) cohort<sup>27</sup>;
- 15 ◆ ZuydErLand COVID-19 regiStry (ELVIS) cohort<sup>28</sup>.

16  
17  
18  
19  
20 Figure 1 shows the aims, study population, and outcomes of each cohort. Electronic case  
21 report forms will be used to facilitate data aggregation in order to answer the CORFU study  
22 aims. Moreover, the study designs of the majority of the individual cohorts have been  
23 aligned in the conceptualization phase. This includes synchronization of the follow-up  
24 moments during which CORFU data will be collected prospectively, as well as a  
25 synchronization of the additional (clinical) data that will be collected in the individual  
26 cohorts, including their level of measurement.  
27

28 In May 2022, the total source population of the participating cohorts included 12,631  
29 participants. However, the total number of CORFU participants will be lower, as it depends  
30 on the survival and the CORFU response rates in the individual cohorts, as well as the  
31 number of participants which are included in multiple cohorts. In addition, five out of seven  
32 cohorts are prospectively including new patients. The CORFU study population will be  
33 described in more detail when reporting the study findings.  
34  
35

### 36 37 **Data collection: CORFU questionnaire**

38 Besides the clinical data collection in the cohorts, the CORFU questionnaire will be  
39 periodically administered to study participants up to two years after suffering from COVID-  
40 19. The CORFU questionnaire is based on an internationally developed basic questionnaire  
41 on persistent symptoms after COVID-19.<sup>27</sup> It is digitally adaptive and includes questions on  
42 the following outcomes and determinants:  
43  
44

#### 45 *Outcomes:*

- 46 ◆ Long COVID symptoms, with a 5-level severity scale;
- 47 ◆ Health-related quality of life (EQ-5D-5L, EQ-VAS);
- 48 ◆ Anxiety and depression (HADS, GAD-2, PHQ-2);
- 49 ◆ Social participation and connectedness;
- 50 ◆ Experienced stigmatization and resilience;
- 51 ◆ Consequences for employment status and personal income.

#### 52 53 54 55 *Determinants:*

- 56 ◆ COVID-19 related factors (e.g. date of diagnosis and/or clinical admission, severity,  
57 wave as surrogate for SARS-CoV-2 strain);
  - 58 ◆ Socio-demographic and diversity factors (e.g. age, sex, gender, socio-economic);
- 59  
60

- ◆ Presence of chronic disease or pre-existing vulnerability;
- ◆ Impact on healthcare access and experienced quality, healthcare avoidance and self-care;
- ◆ Vaccination status at the moment of acute infection.

The CORFU questionnaire will be digitally administered at 3, 6, 12, 18 and 24 months after COVID-19 via a web-based survey or, if requested, on paper. On an individual level, the follow-up moments on which the CORFU questionnaire will be administered depends on the date of first infection (diagnosis and/or admission). In retrospect, not all follow-up moments will apply to all participants. As the CORFU study duration is 15 months, participants will receive a maximum of three CORFU questionnaires. Completing the questionnaire takes, on average, 20-25 minutes, and participants will receive regular reminders to optimize the response rate.

As study participants were included at different time point in the COVID-19 pandemic, depending on their date of first infection, different contextual factors might apply such as lockdowns, the availability of testing material and testing policy, and the vaccination strategy at that time. These factors are presented in detail in Supplementary Table S1.

### **Outcome variables**

The primary outcome is the prevalence of long COVID symptoms up to two years after infection. Symptoms include, but are not limited to, fatigue, muscle weakness, respiratory complaints, cardiovascular complaints, cognitive impairment, anxiety and depression. Secondary outcomes are health-related quality of life, physical functioning, and the prevalence of thromboembolic complications, respiratory complications, cardiovascular diseases and endothelial dysfunction.

Initially, the WHO definition will be used to define long COVID.<sup>1</sup> Potentially identified long COVID phenotypes as part of WP1 and other international developments within the field will also be further considered throughout the study.

### **Data management and data safety**

The data will be stored and accessible according to Findability, Accessibility, Interoperability, and Reusability (FAIR) data standards.<sup>29</sup> For this, we will apply a machine-readable metadata scheme. Two trusted third parties will administer the digital questionnaires in the individual cohorts: Durrer Center for Cardiovascular Research, Amsterdam, the Netherlands, and Triqs, Zwolle, the Netherlands. Durrer Center facilitates autonomous and secure data management and is founded by the Netherlands Heart Institute. Triqs is an innovative research agency facilitating data collection through digital questionnaires.

The data flow is as follows. First, Durrer Center will receive participants' contact details from the participating cohorts, check these for any flaws (e.g. missing contact details and duplications) and encrypt the contact details except email prior to sharing these with Triqs. Next, Triqs will invite the participants for consent and, subsequently, for participation in the CORFU questionnaire. Upon consent, participants will digitally receive the questionnaires. After that, Triqs will store the resulting data records (still encrypted) and send these to Durrer Center. Durrer Center will decrypt and subsequently verify each data record and create a pseudo-anonymized dataset which will be made available to the CORFU research group and the participating cohorts. As part of the data process, obligatory General



Data Protection Regulation (GDPR) contracts will be created between the participating hospitals (care units), Durrer Center, Triqs, and the CORFU study unit. In addition, data access agreements will be arranged between the CORFU study unit and the participating cohorts; post-study secondary analysis of the survey data has been agreed upon in collaboration with the EuroQol Research Foundation. Both Durrer Center and Triqs work processes and facilities meet the Dutch privacy legislation standards (International Organization for Standardization (ISO) and Nederlandse Norm (NEN) norms).

### Work packages and data analysis

This paragraph describes a generic outline of aims and methods of the work packages. Future manuscripts on CORFU work package findings will describe the aims and used methods in more detail. Table 1 displays the work packages (WPs) and the corresponding aims and involved cohorts. Within all WPs, baseline data of participants will be described in detail, stratified by subgroup if necessary. Missing data will be imputed if the percentage of incomplete records exceeds 5% using multiple imputation with fully conditional specification (FCS). The number of imputations will be set to the percentage of incomplete records, and values will be drawn using predictive mean matching.<sup>30</sup>

**Table 1.** Overview of the work packages, including study aims and cohorts

| WP  | Aim                                                                                                                                                                                                                                                                                                                                     | Cohorts involved <sup>a</sup>                                                                |
|-----|-----------------------------------------------------------------------------------------------------------------------------------------------------------------------------------------------------------------------------------------------------------------------------------------------------------------------------------------|----------------------------------------------------------------------------------------------|
| WP1 | 1. Describe the prevalence, severity, time patterns and duration of long COVID symptoms up to two years after acute infection and their relationship with health-related quality of life.<br>2. Describe the received rehabilitation and paramedical support in relation to the persisting symptoms and health-related quality of life. | Data from all cohorts will be used.                                                          |
| WP2 | 3. Describe the pathophysiological mechanisms that may cause long COVID symptoms and the role of vulnerability/resilience factors.                                                                                                                                                                                                      | Every cohort will deliver results for specific pathophysiological hypotheses.                |
| WP3 | 4. Develop and validate a prediction model for the persistence of symptoms, stratified by severity of COVID-19.                                                                                                                                                                                                                         | Data from all cohorts will be used.                                                          |
| WP4 | 5. Develop a patient platform prototype where patients can digitally consult their reported outcomes, compare them with previous outcomes, relate to reference information, and find reported information that fits their situation.                                                                                                    | The platform will be developed and tested in a limited number of cohorts (to be determined). |

<sup>a</sup> CORFU cohorts include Adelante, CAPACITY-COVID, COVAS, DC&TC, ELVIS, MaastrICht and POPCOrn.

**Abbreviations:** CAPACITY-COVID: Cardiac complications in patients with COVID-19 cohorts; COVAS: Bernhoven Early detection of Vascular damage after COVID-19 cohort; DC&TC cohort: Dutch COVID & Thrombosis Consortium cohort; ELVIS: ZuydErLand COVID-19 regiSty; MaastrICht: Maastricht Intensive Care COVID cohort; POPCOrn: POPulation health impact of the COVID-19 pandemic; WP: work package.

WP1 will investigate the first and second study aims. First, data of the seven cohorts will be aggregated and used to estimate the prevalence and severity of long COVID symptoms, expressed as a percentage with a 95% confidence interval and as a distribution of severity scores at every follow-up moment. Next, the association between symptom severity and health-related quality of life will be quantified using linear regression analysis and repeated measurements analysis, adjusted for potential confounders. Finally, rehabilitation and paramedical support will be described using descriptive statistics. Analyses will be stratified

by participant subgroups (i.e. suffered from COVID-19 at home, admitted to hospital ward, admitted to ICU ward). Furthermore, clusters of patients with similar long COVID symptoms will be explored to describe various long COVID phenotypes (such as cardiac complaints) using K-means cluster analyses and hierarchical clustering.<sup>31</sup>

WP2 will investigate the third study aim. Each cohort will formulate specific long COVID research questions related to various pathophysiological mechanisms and data availability. Table 2 shows examples of research questions that will be studied. To explore these pathophysiological mechanisms, data of different cohorts will be aggregated when possible. Next, we will develop directed acyclic graphs (DAGs), presenting (presumed) causal relationships based on current knowledge and new hypotheses while considering long COVID phenotypes identified in WP1. Subsequently, multivariable regression modelling will be used to test the various causal models (expressed in DAGs). Confounding, effect modification, and mediation will be considered by testing as model parameters. Associations will be presented as regression coefficients or odds ratios, including 95% confidence intervals. Analyses will be performed separately for the individual cohort data and for the joint cohort data in which the same outcome measures were used.

**Table 2.** Overview of work package 2 (WP2) hypotheses on pathophysiological mechanisms that might cause long COVID symptoms

| Pathophysiological mechanism          | Main research questions include, but are not limited to:                                                                                                                                                             | Cohort (minimally) involved |
|---------------------------------------|----------------------------------------------------------------------------------------------------------------------------------------------------------------------------------------------------------------------|-----------------------------|
| Thromboembolic complications          | 1. What is the impact of venous thromboembolic complications on long-term functional outcomes in COVID-19 survivors?                                                                                                 | DC&TC                       |
| Cardiovascular diseases               | 2. What is the impact of myocardial damage during hospital ward or ICU stay due to COVID-19 on angina pectoris and dyspnea over time?                                                                                | CAPACITY-COVID              |
| Endothelial dysfunction               | 3. What is the relationship between elevated inflammation parameters and persistent thrombo-inflammation, coagulation, microvascular and macrovascular dysfunction, and respiratory symptoms after COVID-19 disease? | COVAS                       |
| Multi organ failure                   | 4. What is the impact of multi-organ failure during ICU stay on long-term functional outcomes and (health-related) quality of life in COVID-19 survivors?                                                            | MaastrICChT                 |
| Pre-existing coronary atherosclerosis | 5. What is the relationship between pre-existing clinical and subclinical coronary atherosclerosis, angina pectoris, and respiratory symptoms after COVID-19 infection?                                              | ELVIS                       |
| NA                                    | 6. What is the level of functioning during the course of disease in patients following a rehabilitation program after COVID-19 related ICU admission?                                                                | Adelante                    |

**Abbreviations:** CAPACITY-COVID: Cardiac complications in patients with COVID-19 cohorts; COVAS: Bernhoven Early detection of Vascular damage after COVID-19 cohort; DC&TC cohort: Dutch COVID & Thrombosis Consortium cohort; ELVIS: ZuydErLand COVID-19 regiSty; MaastrICChT: Maastricht Intensive Care COVID cohort; NA: not applicable; POPCORN: POPulation health impact of the COVID-19 pandemic

WP3 will investigate the fourth study aim. In order to develop a prediction model, we will aim to identify the set of predictors, measured at time of COVID-19 diagnosis and during the course of the disease, that will maximize the ability to discriminate patients who experience long COVID symptoms from patients who do not experience these symptoms.

Potential predictors will be selected from the living review by Wynants et al. and recent literature.<sup>32</sup> Using backward stepwise elimination on the Akaike Information Criterion in logistic regression analysis, the initial model structure and parameters (including follow-up period) will be estimated. Additionally, the model will be internally validated using bootstrapping techniques.

WP4 will address the fifth study aim: developing and testing a patient platform prototype. As the patient platform will be connected to the digital questionnaire platform, individual CORFU questionnaire responses can be presented individually to the corresponding patient. It offers the possibility for patients to consult their own situation, compare this with the past and with the situation of similar patients, profit from suggestions of other patients in similar situations, and gain insight into their future health. The specific content (e.g. which symptom domains and other domains of interest) to be presented in the patient platform will be based on focus groups with healthcare professionals, (former) patients and patient representatives. Patient platforms aim to increase empowerment and reassurance (outcomes tested) and might provide guidance in healthcare-seeking and self-care. By providing feedback on the given answers, the platform increase patients' knowledge and self-consciousness about the potential existence of long COVID-19 symptoms and change over time, thereby putting them in own data-driven control on their health situation.

### **Sample size calculation**

The sample size for this study is established pragmatically. A heterogeneous sample of COVID-19 patients is included by choosing different cohorts with considerable heterogeneity in the severity of the disease, national coverage and without any exclusion criteria. This resulted in a collection of seven small to very large cohorts. Our sample size calculations of WP1, WP2, and WP3 are based on the smallest subgroup of patients that will be analyzed in this study.

Firstly, for estimating the prevalence of long COVID symptoms (WP1), for the least favorable percentage of 50% (the variance of a percentage is highest at 50%), the maximum width of the 95% confidence interval will be approximately plus and minus 5%. For all other percentages, the confidence interval will be even smaller. Secondly, for investigating the pathophysiological mechanisms that may cause long COVID symptoms (WP2), there will be sufficient power to detect associations with symptom severity, expressed in standardized effect size (Cohen's *d*) of 0.3, with a power of 80% and a type-I error of 5%. Thirdly, for the development of a prediction model for long COVID complaints (WP3), we anticipate a large number of cases, taking into account that 57% of patients suffered from at least one long COVID complaint up to six months after infection.<sup>15</sup> Depending on the response rate and resulting sample size, we will determine the maximum number of candidate predictors we can use for multivariable modeling with the method of Riley et al., allowing a maximum shrinkage of predictor coefficients of 0.9.<sup>33</sup>

Statistical tests or estimations are not part of WP4. Therefore, sample size or statistical power calculations are not applicable for WP4.

### **Patient and public involvement**

Patient organizations (Family and patient Centered Intensive Care (FCIC), IC Connect and the 'Hartenraad') and patients of the Maastricht University Medical Centre+ (MUMC+) Intensive Care panel were involved in the design of the CORFU study. Patients were involved in the

1  
2  
3 development and testing of the international basic questionnaire on persistent symptoms  
4 after COVID-19, which serves as the basis for the CORFU questionnaire. In addition, patients  
5 provided feedback on the phrasing of questions, the fill-out time of the questionnaire and  
6 the willingness to fill out the questionnaire periodically. Participants will be able to provide  
7 feedback on the (missing) content of the CORFU questionnaire through an open-ended  
8 question. Comments will be discussed and implemented prospectively when deemed  
9 relevant, making the CORFU questionnaire a continuously developing measurement  
10 instrument.  
11  
12

13 Patients will have an advisory role in developing the patient platform prototype  
14 (WP4), which allows patients to digitally consult their answers in real-time and compare  
15 them with reference populations. In addition, advice will be asked on the (type of) provided  
16 feedback questions, the formatting and visualization of answers, and the relevant reference  
17 groups to be considered. Eventually, CORFU findings will be presented in a lay summary,  
18 and a flyer on long COVID will be developed in close collaboration with patients. The  
19 dissemination strategy of CORFU findings and the long COVID flyer will be based on patient  
20 and public preferences, in which also the involved patient organizations will have an  
21 important role.  
22  
23  
24

## 25 **DISCUSSION**

26 The CORFU study has the opportunity to investigate the prevalence, pathophysiological  
27 mechanisms, and prediction of long COVID, and its relationship with health-related quality  
28 of life. CORFU will aggregate data from seven existing COVID-19 cohorts and will enrich the  
29 data with prospective follow-up of long COVID outcomes and determinants up to a  
30 maximum of two years after acute infection. A prediction model and patient platform  
31 prototype will be developed to guide future patient care.  
32  
33

34 Estimation of the prevalence of long COVID symptoms up to two years after  
35 infection, will be based on the multidimensional CORFU questionnaire, including physical  
36 and psychological complaints after COVID-19. The extensive set of physical complaints gives  
37 the opportunity to study symptoms in great detail. The additional focus on psychological  
38 impact addresses the call to take COVID-19 psychopathology into account when designing  
39 new studies. It reflects the current knowledge that mental well-being is worse in patients  
40 who suffered from COVID-19 compared with healthy respondents and that there is a high  
41 rate of mental health complaints up to one year after acute infection.<sup>27 34</sup>  
42  
43

44 CORFU findings may be used to inform national and international guidelines on  
45 diagnostics, treatment and follow-up of long COVID and contribute to developing a (new)  
46 more accurate long COVID definition, likely differentiating long COVID phenotypes. Available  
47 guidelines and definitions on long COVID are currently, as expected, based on short-term  
48 follow-up studies, whereas CORFU will report long COVID symptoms up to two years after  
49 infection.<sup>1 35</sup> Besides, the current WHO long COVID definition remains broad and unspecific,  
50 thereby lacking accurate differentiation of its heterogeneous appearance into clinical  
51 phenotypes. Defining such phenotypes with potentially adding clinical parameters  
52 (biomarkers, imaging, etc.) might enhance clinical workability, and thereby diagnostics, and  
53 the development of tailored therapies based on underlying pathophysiology.  
54  
55

56 An important strength of the CORFU study is that data will be aggregated from seven  
57 cohorts of (former) COVID-19 patients. Due to mortality and non-response, the effective  
58 number might be slightly lower. Nevertheless, the large CORFU sample size allows for robust  
59 analysis. Furthermore, the difference in designs of the cohorts allows us to answer study  
60

1  
2  
3 aims for various subgroups (e.g. COVID-19 at home versus hospitalized (ward and/or ICU))  
4 and to test multiple, detailed, pathophysiological hypotheses, depending on the  
5 characteristics of the patients included in the participating cohorts, also related to COVID-19  
6 variants by using wave at the time of infection as a surrogate marker. Furthermore, the  
7 ability to aggregate data of multiple cohorts is an efficient way of (close) national  
8 collaboration which contributes to more robust and reliable findings compared with  
9 multiple, parallel, single cohort studies with smaller sample sizes.  
10  
11

12 Another strength is that CORFU will use data from a large control group of  
13 respondents who did not suffer from COVID-19. This allows the comparison of the  
14 prevalence of long COVID symptoms with the prevalence of these symptoms in the general  
15 Dutch, non-COVID-19 population, potentially highlighting the secondary impacts of the  
16 pandemic. This is a crucial comparison currently lacking in the majority (79%) of long COVID  
17 research but required to identify and quantify attributable symptoms objectively.<sup>36</sup> For  
18 instance, the (social) restrictions may significantly impact the quality of life and (mental)  
19 well-being of the general population.<sup>13 27 37 38</sup> These factors need to be considered when  
20 analyzing and interpreting the CORFU findings. Lastly, as part of WP4, patients will receive  
21 personalized feedback on their own questionnaire outcomes and those of other patients in  
22 similar situations.  
23  
24

25 Potential limitations of the CORFU study also merit consideration. Firstly, combining  
26 data from seven cohorts is challenging. As each cohort has specific study aims regarding the  
27 pathophysiological processes causing long COVID symptoms, not all cohorts collect the same  
28 (clinical) information from their participants. To ensure that data from all cohorts can be  
29 integrated and that between-cohort comparisons are possible, a minimal set of variables  
30 was (post-hoc) harmonized among the participating cohorts regarding background  
31 characteristics (e.g. socio-demographics, employment status, social, economic status,  
32 cultural background), comorbidities, and potential confounders. Furthermore, to optimize  
33 the data integration process, data received from the cohorts will be transferred into a  
34 machine-readable metadata scheme prior to merging the various datasets. Secondly, there  
35 will be an overrepresentation of (former) COVID-19 patients admitted to the hospital ward  
36 and/or ICU compared to those who suffered from COVID-19 at home. This affects  
37 estimations of long COVID prevalence, which can be evaluated by post-hoc stratification  
38 using community-based cases. The epidemiological basis used for the statistical models to  
39 develop prediction models is independent of in-/outpatient distribution and depends solely  
40 on the associations and interactions found within specific patient groups, as COVID-19  
41 severity will be added as a covariate. Moreover, analyses will be stratified by disease  
42 severity for subgroup-specific conclusions. Thirdly, especially in the first COVID-19 wave  
43 (March 1 – June 30, 2020) for non-hospitalized patients, not all suspected COVID-19 cases  
44 were tested due to capacity and test-material constraints in the Netherlands. However,  
45 these patients were included in (some of) the cohorts despite the lack of a confirmed  
46 infection. Therefore, findings might be based on suspected instead of confirmed infections.  
47 The same holds for controls not being tested due to the absence of symptoms  
48 (Supplementary Table S1). This might result in some misclassification of cases that had no or  
49 only very mild symptoms, never got tested, and will likely report never or possibly having  
50 suffered from COVID-19. We hypothesize that these extremely mild cases are not those that  
51 are likely to develop long COVID, but if they do, they may slightly decrease the difference  
52 between long COVID cases and controls and hence, result in slight conservative estimates of  
53  
54  
55  
56  
57  
58  
59  
60

1  
2  
3 the total burden of disease. This will be described when reporting CORFU study results, and,  
4 when deemed relevant, additional (stratified) analyses will be conducted.  
5  
6

## 7 **ETHICS AND DISSEMINATION**

8 This study will be conducted according to the latest update of the Declaration of Helsinki  
9 and is registered at ClinicalTrials.gov (NCT05240742). Ethics approval was obtained from the  
10 medical research ethics committee (MREC) of Maastricht University Medical Center+ and  
11 Maastricht University (committee reference number METC2021-2990) and the local MRECs  
12 of the participating cohorts (Supplementary Table S2). Participants will be asked for written  
13 or digital informed consent, by the cohort in which they are participating, prior to  
14 administering the first CORFU questionnaire and will be informed that participation is  
15 voluntary. Data will be made available (Open Science/FAIR) subject to ethical approval and  
16 standard access and anonymization procedures.  
17  
18  
19

### 20 **Author contributions**

21 BCTB, BH, BLJHK, CGD, EB, FAK, FWA, GJB, HC, ICCH, JAH, JWLC, KV, MCW and SMJK  
22 conceived and designed the study. CGD, DOK, EBNJJ, MSJNW, SCMh and SMJK drafted the  
23 manuscript. BCTB, BH, BLJHK, EB, FAK, FWA, GJB, HC, ICCH, JAH, JWLC, KV, LHW, MCW,  
24 MDK, ML, RW and SS critically reviewed the manuscript. All authors read and approved the  
25 final manuscript.  
26  
27  
28

### 29 **Funding**

30 This work is supported by The Netherlands Organization for Health Research and  
31 Development (ZonMW), grant number 10430302110005, and an unrestricted grant has  
32 been received from the EuroQol Research Foundation. Individual COVID-19 cohorts  
33 contributing to the CORFU study may have been funded independently from this grant.  
34  
35

### 36 **Competing interests**

37 BCTB, BH, BLJHK, GH, DOK, EB, EBNJJ, GJB, ICCH, JAH, JWLC, LHW, MSJNW, MCW, RW,  
38 SCMh, SMJK, SS and BH declare no competing interests. FAK received research support from  
39 Bayer, BMS, Boehringer-Ingelheim, MSD, Daiichi-Sankyo, Actelion, Boston Scientific, The  
40 Netherlands Organization for Health Research and Development (ZonMW), The Dutch  
41 Thrombosis Association, and The Dutch Heart Foundation. FWA is supported by the National  
42 Institute of Health Research University College London Hospitals Biomedical Research  
43 Centre. For the CAPACITY-COVID cohort participating in CORFU, FWA and ML received  
44 support from Dutch Heart Foundation (2020B006 CAPACITY) an The Netherlands  
45 Organization for Health Research and Development (ZonMW) (grant number  
46 10430102110006 DEFENCE). HC received support from Bayer, received consulting fees from  
47 Pfizer, Leo, Alveron, Viatrix, Astra Zeneca, and Galapagos, and has stock (options) in  
48 Coagulation Profile. KV has royalties or licences for Philips, Medtronic, Abbott, and Biosense  
49 Webster, received consulting fees from Philips, Biosense Webster, Boston Scientific, and  
50 Medtronic, and has a role in the European Heart Rhythm Association congress organization  
51 and digital committee. MDK received a presentation fee from Glaxo Smith Kline. ML is  
52 supported by the Alexandre Suerman Stipend of the University Medical Center Utrecht.  
53  
54  
55  
56  
57

### 58 **ORCID iDs:**

59 MSJN Wintjens            0000-0002-7384-6002  
60

|    |                   |                     |
|----|-------------------|---------------------|
| 1  |                   |                     |
| 2  |                   |                     |
| 3  | C Ghossein-Doha   | 0000-0003-4783-0987 |
| 4  | EBNJ Janssen      | 0000-0001-6916-7261 |
| 5  | DO Klein          | 0000-0003-0182-9569 |
| 6  | SCM Heemskerk     | 0000-0002-1320-8084 |
| 7  | FW Asselbergs     | 0000-0002-1692-8669 |
| 8  | E Birnie          | 0000-0002-4534-4857 |
| 9  | GJ Bonsel         | 0000-0002-8364-1086 |
| 10 | BCT van Bussel    | 0000-0003-1621-7848 |
| 11 | JWL Cals          | 0000-0001-9550-5674 |
| 12 | H ten Cate        | 0000-0001-7796-4463 |
| 13 | JA Haagsma        | 0000-0002-2055-548X |
| 14 | B Hemmen          | 0000-0003-3066-3254 |
| 15 | ICC van der Horst | 0000-0003-3891-8522 |
| 16 | BLJH Kietselaer   | 0000-0002-0096-8594 |
| 17 | FA Klok           | 0000-0001-9961-0754 |
| 18 | MD de Kruif       | 0000-0003-2883-9441 |
| 19 | M Linschoten      | 0000-0002-4541-080X |
| 20 | S van Santen      | NA                  |
| 21 | K Vernooij        | 0000-0002-8818-5964 |
| 22 | LH Willems        | 0000-0002-2728-9663 |
| 23 | R Westerborg      | NA                  |
| 24 | MC Warlé          | 0000-0002-1151-4571 |
| 25 | SMJ van Kuijk     | 0000-0003-2796-729X |
| 26 |                   |                     |
| 27 |                   |                     |
| 28 |                   |                     |
| 29 |                   |                     |
| 30 |                   |                     |
| 31 |                   |                     |
| 32 |                   |                     |
| 33 |                   |                     |
| 34 |                   |                     |
| 35 |                   |                     |
| 36 |                   |                     |
| 37 |                   |                     |
| 38 |                   |                     |
| 39 |                   |                     |
| 40 |                   |                     |
| 41 |                   |                     |
| 42 |                   |                     |
| 43 |                   |                     |
| 44 |                   |                     |
| 45 |                   |                     |
| 46 |                   |                     |
| 47 |                   |                     |
| 48 |                   |                     |
| 49 |                   |                     |
| 50 |                   |                     |
| 51 |                   |                     |
| 52 |                   |                     |
| 53 |                   |                     |
| 54 |                   |                     |
| 55 |                   |                     |
| 56 |                   |                     |
| 57 |                   |                     |
| 58 |                   |                     |
| 59 |                   |                     |
| 60 |                   |                     |

## References

1. World Health Organization. A clinical case definition of post COVID-19 condition by a Delphi consensus: World Health Organization 2021.
2. Blomberg B, Mohn KG-I, Brokstad KA, et al. Long COVID in a prospective cohort of home-isolated patients. *Nat Med* 2021;27(9):1607-13.
3. Huang L, Yao Q, Gu X, et al. 1-year outcomes in hospital survivors with COVID-19: a longitudinal cohort study. *The Lancet* 2021;398(10302):747-58.
4. Peghin M, Palese A, Venturini M, et al. Post-COVID-19 symptoms 6 months after acute infection among hospitalized and non-hospitalized patients. *Clin Microbiol Infect* 2021;27(10):1507-13.
5. Lopez-Leon S, Wegman-Ostrosky T, Perelman C, et al. More than 50 Long-term effects of COVID-19: a systematic review and meta-analysis. *medRxiv* 2021
6. Ceban F, Ling S, Lui LMW, et al. Fatigue and Cognitive Impairment in Post-COVID-19 Syndrome: A Systematic Review and Meta-Analysis. *Brain Behav Immun* 2021
7. BATTERY S, PHILIP KEJ, WILLIAMS P, et al. Patient symptoms and experience following COVID-19: results from a UK-wide survey. *BMJ Open Respir Res* 2021;8(1)
8. Sudre CH, Murray B, Varsavsky T, et al. Attributes and predictors of long COVID. *Nat Med* 2021;27(4):626-31.
9. Han JH, Womack KN, Tenforde MW, et al. Associations between persistent symptoms after mild COVID-19 and long-term health status, quality of life, and psychological distress. *Influenza Other Respir Viruses* 2022
10. O'Kelly B, Vidal L, Avramovic G, et al. Assessing the impact of COVID-19 at 1-year using the SF-12 questionnaire: Data from the Anticipate longitudinal cohort study. *Int J Infect Dis* 2022;118:236-43.

11. Xie Y, Xu E, Bowe B, et al. Long-term cardiovascular outcomes of COVID-19. *Nat Med* 2022
12. Groff D, Sun A, Ssentongo AE, et al. Short-term and Long-term Rates of Postacute Sequelae of SARS-CoV-2 Infection: A Systematic Review. *JAMA Network Open* 2021;4(10):e2128568-e68.
13. Pedrosa AL, Bitencourt L, Fróes ACF, et al. Emotional, Behavioral, and Psychological Impact of the COVID-19 Pandemic. *Front Psychol* 2020;11:566212-12.
14. Nicola M, Alsaifi Z, Sohrabi C, et al. The socio-economic implications of the coronavirus pandemic (COVID-19): A review. *Int J Surg* 2020;78:185-93.
15. Wynberg E, van Willigen HDG, Dijkstra M, et al. Evolution of COVID-19 symptoms during the first 12 months after illness onset. *Clin Infect Dis* 2021
16. Taquet M, Dercon Q, Luciano S, et al. Incidence, co-occurrence, and evolution of long-COVID features: A 6-month retrospective cohort study of 273,618 survivors of COVID-19. *PLoS Med* 2021;18(9):e1003773.
17. Jovanoski N, Chen X, Becker U, et al. Severity of COVID-19 and adverse long-term outcomes: a retrospective cohort study based on a US electronic health record database. *BMJ Open* 2021;11(12):e056284.
18. Bai F, Tomasoni D, Falcinella C, et al. Female gender is associated with long COVID syndrome: a prospective cohort study. *Clin Microbiol Infect* 2021
19. Sigfrid L, Drake TM, Pauley E, et al. Long Covid in adults discharged from UK hospitals after Covid-19: A prospective, multicentre cohort study using the ISARIC WHO Clinical Characterisation Protocol. *medRxiv* 2021:2021.03.18.21253888.
20. Needham DM, Davidson J, Cohen H, et al. Improving long-term outcomes after discharge from intensive care unit: report from a stakeholders' conference. *Crit Care Med* 2012;40(2):502-9.
21. Wiertz CMH, Vints WAJ, Maas G, et al. COVID-19: Patient Characteristics in the First Phase of Postintensive Care Rehabilitation. *Arch Rehabil Res Clin Transl* 2021;3(2):100108.
22. Willems LH, Nagy M, Ten Cate H, et al. Sustained inflammation, coagulation activation and elevated endothelin-1 levels without macrovascular dysfunction at 3 months after COVID-19. *Thromb Res* 2022;209:106-14.
23. Linschoten M, Asselbergs FW. CAPACITY-COVID: a European Registry to determine the role of cardiovascular disease in the COVID-19 pandemic. *Eur Heart J* 2020;41(19):1795-96.
24. CAPACITY-COVID Collaborative Consortium and LEOSS Study Group. Clinical presentation, disease course, and outcome of COVID-19 in hospitalized patients with and without pre-existing cardiac disease: a cohort study across 18 countries. *Eur Heart J* 2022;43(11):1104-20.
25. Kruip M, Cannegieter SC, Ten Cate H, et al. Caging the dragon: Research approach to COVID-19-related thrombosis. *Res Pract Thromb Haemost* 2021;5(2):278-90.
26. Tas J, van Gassel RJJ, Heines SJH, et al. Serial measurements in COVID-19-induced acute respiratory disease to unravel heterogeneity of the disease course: design of the Maastricht Intensive Care COVID cohort (MaastricCht). *BMJ Open* 2020;10(9):e040175.
27. Long D, Haagsma JA, Janssen MF, et al. Health-related quality of life and mental well-being of healthy and diseased persons in 8 countries: Does stringency of government response against early COVID-19 matter? *SSM Popul Health* 2021;15:100913.
28. Leijte WT, Wagemaker NM, van Kraaij TD, et al. Sterfte en heropname na ziekenhuisopname met covid-19. *Ned Tijdschr Geneesk* 2020
29. Wilkinson MD, Dumontier M, Aalbersberg IJ, et al. The FAIR Guiding Principles for scientific data management and stewardship. *Scientific Data* 2016;3(1):160018.
30. Sterne JA, White IR, Carlin JB, et al. Multiple imputation for missing data in epidemiological and clinical research: potential and pitfalls. *BMJ* 2009;338:b2393.
31. Castela Forte J, Perner A, van der Horst ICC. The use of clustering algorithms in critical care research to unravel patient heterogeneity. *Intensive Care Med* 2019;45(7):1025-28.
32. Wynants L, Van Calster B, Collins GS, et al. Prediction models for diagnosis and prognosis of covid-19: systematic review and critical appraisal. *BMJ* 2020;369:m1328.



- 1  
2  
3 33. Riley RD, Snell KI, Ensor J, et al. Minimum sample size for developing a multivariable prediction  
4 model: PART II - binary and time-to-event outcomes. *Stat Med* 2019;38(7):1276-96.  
5  
6 34. Mazza MG, Palladini M, De Lorenzo R, et al. One-year mental health outcomes in a cohort of  
7 COVID-19 survivors. *J Psychiatr Res* 2021;145:118-24.  
8  
9 35. National Institute for Health and Care Excellence, Scottish Intercollegiate Guidelines Network,  
10 Royal College of General Practitioners. COVID-19 rapid guideline: managing the long-term  
11 effects of COVID-19, 2021.  
12  
13 36. Amin-Chowdhury Z, Ladhani SN. Causation or confounding: why controls are critical for  
14 characterizing long COVID. *Nat Med* 2021;27(7):1129-30.  
15  
16 37. May T, Aughterson H, Fancourt D, et al. 'Stressed, uncomfortable, vulnerable, neglected': a  
17 qualitative study of the psychological and social impact of the COVID-19 pandemic on UK  
18 frontline keyworkers. *BMJ Open* 2021;11(11):e050945.  
19  
20 38. Epifanio MS, Andrei F, Mancini G, et al. The Impact of COVID-19 Pandemic and Lockdown  
21 Measures on Quality of Life among Italian General Population. *J Clin Med* 2021;10(2)  
22  
23  
24  
25  
26  
27  
28  
29  
30  
31  
32  
33  
34  
35  
36  
37  
38  
39  
40  
41  
42  
43  
44  
45  
46  
47  
48  
49  
50  
51  
52  
53  
54  
55  
56  
57  
58  
59  
60

# CORona Follow-Up (CORFU) study

**Adelante<sup>21</sup>**  
(n=158)\*

**CAPACITY-  
COVID<sup>23,24</sup>**  
(n=5,575)\*

**COVAS<sup>22</sup>**  
(n=203)

**DC&TC<sup>25</sup>**  
(n=350, nested in  
CAPACITY-COVID)\*

**ELVIS<sup>28</sup>**  
(n=2,543)\*

**MaastrICCh<sup>26</sup>**  
(n=509)\*

**POPCOrn<sup>27</sup>**  
(n=3,293)

## Aim

Investigate the course of functioning after COVID-19 disease in patients who were admitted for inpatient or outpatient rehabilitation after discharge and investigate well-being of their relatives

## Study population

All patients who:  
- were admitted for inpatient rehabilitation at the Adelante rehabilitation center after ICU/hospital discharge; or  
- patients who recovered at home and were in need of outpatient rehabilitation

## Available data

- Patient characteristics
- Functional characteristics
- Environmental factors
- Personal factors
- Rehabilitation characteristics

## Study design

Aligned with:  
- CAPACITY-COVID  
- DC&TC  
- MaastrICCh

Similar to:

- COVAS
- ELVIS
- POPCOrn

## Aim

Investigate the role of cardiovascular disease in the COVID-19 pandemic

## Study population

Patients admitted to the hospital with (highly suspected) COVID-19

## Available data

- Patient characteristics
- Cardiovascular risk factors
- Use of cardiovascular medication
- Use of NSAIDs
- Cardiovascular biomarkers
- ECGs
- Echocardiographical parameters
- In-hospital outcomes

## Study design

Aligned with:  
- Adelante  
- DC&TC  
- MaastrICCh

Similar to:

- COVAS
- ELVIS
- POPCOrn

## Aim

Investigate a possible relationship between increased inflammation parameters and persistent thrombo-inflammatory and microvascular dysfunction and respiratory symptoms in COVID-19 disease

## Study population

All patients admitted to the ward or ICU in Bernhoven Hospital who were:  
- confirmed COVID-19 (positive PCR) or  
- patients who were COVID-19 positive in the emergency ward and recovered at home

## Available data

- Patient characteristics
- Carotid Artery Reactivity test
- Microvascular dysfunction markers in blood plasma
- Inflammatory plasma cytokines
- Coagulation factors and inhibitors

## Study design

Similar to all cohorts

## Aim

Investigate the incidence of post VTE complications (specifically: post thrombotic syndrome, chronic thromboembolic disease and chronic thromboembolic pulmonary hypertension) and their impact on outcomes in COVID-19 survivors

## Study population

Patients admitted to the hospital between March 1, 2020 and January 1, 2021 who:  
- suffered from confirmed COVID-19 (using CT or echocardiography); and  
- had a confirmed VTE

## Available data

- Patient characteristics
- Biomarkers of inflammation and coagulation
- Imaging and tissue damage during first episode of COVID-19 disease
- PROMS
- Functional tests
- Follow-up moments (3 months, 1 year, 2 years)

## Study design

Aligned with:  
- Adelante  
- CAPACITY-COVID  
- MaastrICCh

Similar to:

- COVAS
- ELVIS
- POPCOrn

## Aim

Investigate complications after COVID-19 hospitalization, mortality after hospital discharge and readmission (indications and risk factors)

## Study population

All patients admitted to Zuyderland Medical Center who suffered from confirmed COVID-19 (positive PCR or a positive scored CT scan of the chest (4 or 5 on CORADS by a radiologist))

## Available data

- Patient characteristics

## Study design

Similar to all cohorts

## Aim

Unravel clinical heterogeneity of COVID-19 disease during ICU stay and follow-up using serial data

## Study population

All patients admitted to the ICU in Maastricht University Medical Center+ who:  
- suffered from confirmed COVID-19 (positive PCR or a positive scored CT scan of the chest (4 or 5 on CO-RADS by a radiologist); and  
- were intubated; and  
- were mechanically ventilated

## Available data

- Patient characteristics
- Serial data (medication use, complications, severity of disease, multi organ failure)
- Respiratory parameters
- Markers of coagulation
- Cardiovascular variables
- Metabolic variables
- Follow-up moments (3 months, 1 year)

## Study design

Aligned with:  
- Adelante  
- DC&TC  
- CAPACITY-COVID

Similar to:

- COVAS
- ELVIS
- POPCOrn

## Aim

Investigate effects of COVID-19 on health-related quality of life, mental health and wellbeing of the general population and investigate the role of individual determinants of health, health system features and government response against COVID-19

## Study population

- Patients (18-75 years) who suffered from (suspected or confirmed) COVID-19 (including patients who recovered at home)  
- People who did not suffer from COVID-19 will be used as a control group

## Available data

- Patient/Control characteristics
- Risk factors
- Use of health services
- Barriers to healthcare
- Care avoiders among this population
- Living situation

## Study design

Similar to all cohorts

1  
2  
3  
4  
5  
6  
7  
8  
9

## SUPPLEMENTARY TABLES

### Prevalence, pathophysiology, prediction and health-related quality of life of long COVID: design of the longitudinal multiple cohort CORona Follow Up (CORFU) study

10  
11  
12  
13  
14  
15  
16  
17  
18  
19  
20  
21  
22  
23  
24  
25  
26  
27  
28  
29  
30  
31  
32  
33  
34  
35  
36  
37  
38  
39  
40  
41  
42  
43  
44  
45  
46  
47  
48  
49  
50  
51  
52  
53  
54  
55  
56  
57  
58  
59  
60

**Table S1.** COVID-19 lockdown, testing policy and vaccination strategy timelines in the Netherlands from 2020 to 2022

| National lockdown and reopening timeline |                                                                                                                                                                                                                                                                                                                                                                                                                                            |
|------------------------------------------|--------------------------------------------------------------------------------------------------------------------------------------------------------------------------------------------------------------------------------------------------------------------------------------------------------------------------------------------------------------------------------------------------------------------------------------------|
| <b>2020</b>                              |                                                                                                                                                                                                                                                                                                                                                                                                                                            |
| February 28                              | First COVID-19 patient in the Netherlands.                                                                                                                                                                                                                                                                                                                                                                                                 |
| March 1                                  | Advise to stay at home when returning from a foreign high risk area and with mild COVID-19 symptoms.                                                                                                                                                                                                                                                                                                                                       |
| March 12                                 | Advise to work from home for all civil servants in non-critical functions.                                                                                                                                                                                                                                                                                                                                                                 |
| March 13                                 | Assembly ban for more than 100 people.                                                                                                                                                                                                                                                                                                                                                                                                     |
| March 15                                 | <b>Partial lockdown:</b> Advice to keep 1.5m distance; Closure of cafes, bars and restaurants, clubs, discotheques, cinemas, theaters, indoor and outdoor sport facilities, fitness centers and wellness centers.                                                                                                                                                                                                                          |
| March 16                                 | Closure of “contact professions” (with the exception of (para)medical professions), primary and secondary schools and day care.                                                                                                                                                                                                                                                                                                            |
| March 20                                 | Visitors are no longer allowed in nursing homes.                                                                                                                                                                                                                                                                                                                                                                                           |
| May 11                                   | Partial reopening of contact professions, primary schools and day care. It is allowed to sport outside with 1.5m distance.                                                                                                                                                                                                                                                                                                                 |
| June 1                                   | Partial reopening of primary secondary schools; Reopening of cafes, bars and restaurants, cinemas and theaters with a maximum of 30 people.                                                                                                                                                                                                                                                                                                |
| June 1                                   | It is mandatory to wear a mask in public transport.                                                                                                                                                                                                                                                                                                                                                                                        |
| June 8                                   | 100% reopening of primary schools and day care.                                                                                                                                                                                                                                                                                                                                                                                            |
| June 15                                  | Nursing home residents are allowed to have 1 fixed visitor per day.                                                                                                                                                                                                                                                                                                                                                                        |
| July 1                                   | The assembly ban for larger assemblies is abolished.                                                                                                                                                                                                                                                                                                                                                                                       |
| August 18                                | Assembly ceiling is lowered to 6 visitors (>12 years) at home per day.                                                                                                                                                                                                                                                                                                                                                                     |
| August 31                                | 100% reopening of secondary schools.                                                                                                                                                                                                                                                                                                                                                                                                       |
| September 29                             | Assembly ceiling is lowered to 3 visitors (>12 years) at home per day; Cafes, bars and restaurants must close at 22.00; Contact professions are obliged to register clients; Closure of sports cafeterias; Sports competitions are without any audience.                                                                                                                                                                                   |
| October 14                               | <b>Partial lockdown:</b> Advise to wear masks in publicly accessible locations inside; Assembly ceiling is lowered to 3 visitors (>12 years) at home per day; Assembly ban for more than 30 people inside; Closure of cafes, bars and restaurants; Event and sports competitions ban; Students in secondary schools, MBO, HBO and universities are obliged to wear mask outside of class; Assembly ban for sports with more than 4 people. |
| November 4                               | The advice is to stay at home; Assembly ceiling is lowered to 2 visitors or 1 household at home per day (both inside and outside); Closure of publicly accessible locations; Assembly ban for sports with more than 2 people.                                                                                                                                                                                                              |
| December 1                               | It is mandatory to wear a mask (>12 years) in publicly accessible locations inside.                                                                                                                                                                                                                                                                                                                                                        |
| December 14                              | <b>Lockdown:</b> Closure of all non-essential shops, indoor and outdoor sports facilities, fitness centers, primary and secondary schools and day care.                                                                                                                                                                                                                                                                                    |
| <b>2021</b>                              |                                                                                                                                                                                                                                                                                                                                                                                                                                            |
| January 20                               | Assembly ceiling is lowered to 1 visitor (>12 years) at home per day.                                                                                                                                                                                                                                                                                                                                                                      |

|              |                                                                                                                                                                                                                                                                                                                                                                                                                                                      |
|--------------|------------------------------------------------------------------------------------------------------------------------------------------------------------------------------------------------------------------------------------------------------------------------------------------------------------------------------------------------------------------------------------------------------------------------------------------------------|
| January 23   | Curfew between 21:00-04.30.                                                                                                                                                                                                                                                                                                                                                                                                                          |
| February 8   | Reopening of primary schools and day care; Non-essential shops are allowed to open for "click and collect".                                                                                                                                                                                                                                                                                                                                          |
| March 1      | Partial reopening of secondary schools and MBO.                                                                                                                                                                                                                                                                                                                                                                                                      |
| March 3      | Partial reopening of contact professions, non-essential shops (appointment-based); Assembly ban for outside sports is abolished for people ≤ 26 years within their own sports club.                                                                                                                                                                                                                                                                  |
| March 8      | Vaccinated nursing home residents are allowed to have 2 visitors per day.                                                                                                                                                                                                                                                                                                                                                                            |
| March 16     | Assembly ceiling for outside sports is increased to 4 people.                                                                                                                                                                                                                                                                                                                                                                                        |
| March 31     | Curfew between 22:00-4:30.                                                                                                                                                                                                                                                                                                                                                                                                                           |
| April 26     | Partial reopening of HBO and universities.                                                                                                                                                                                                                                                                                                                                                                                                           |
| April 28     | Curfew is abolished; Assembly ceiling is increased to 2 visitor (>12 years) at home per day; Reopening of terraces between 12:00-18:00 with a maximum of 2 persons or 1 household per table; Reopening of non-essential stores with a maximum of 1 customer per 25m <sup>2</sup> .                                                                                                                                                                   |
| May 19       | Assembly ceiling for outside sports is increased to 30 adults; Reopening of swimming pools, sports facilities and fitness centers with an assembly ban of more than 30 people; Reopening of outside publicly accessible locations (appointment-based) and libraries.                                                                                                                                                                                 |
| June 5       | Assembly ceiling is increased to 4 visitors (>12 years) at home per day; Assembly ban for outside groups of more than 4 people; Assembly ceiling for outside sports is increased to 50 adults; Reopening of dressing rooms and sports cafeterias; Reopening of cafes, bars and restaurants including terraces between 06:00-22:00, museums, cinemas and theatres,                                                                                    |
| June 26      | Assembly ban for visitors at home is abolished; No more regulations for a maximum number of people outside in a group; It is mandatory to wear masks when there is no 1.5m distance; Prolonged opening hours for cafes, bars, restaurants, shops and theaters; Reopening of clubs and discotheques; Advise to work from home 50% of the time; Events are allowed with a covid certificate; Amateur sports competitions can be held with an audience. |
| July 10      | Closure of clubs and discotheques; Events have a maximum duration of 24 hours and participants must be seated (67% capacity); Cafes, bars and restaurants must close at 00:00 and visitors must be seated.                                                                                                                                                                                                                                           |
| July 19      | Working from home unless this is not possible.                                                                                                                                                                                                                                                                                                                                                                                                       |
| August 8     | Returning from countries with a yellow travel advice is only possible with a covid certificate.                                                                                                                                                                                                                                                                                                                                                      |
| August 30    | Partial reopening of MBO, HBO and universities without 1.5m distance.                                                                                                                                                                                                                                                                                                                                                                                |
| September 25 | Covid certificate is mandatory (> 12 years) in cafes, bars and restaurants, at festivals and events, at sports competitions, cinemas and theaters.                                                                                                                                                                                                                                                                                                   |
| September 25 | It is no longer mandatory to keep 1.5m distance; Working from home if possible; Maximum number of visitors for inside festivals, shows, parties and sports competitions which must close at 00:00.                                                                                                                                                                                                                                                   |
| November 3   | Work from home for at least 50% of the time.                                                                                                                                                                                                                                                                                                                                                                                                         |
| November 6   | Wear a mask in buildings without the need for a covid certificate; Use of the mandatory covid certificate is expended.                                                                                                                                                                                                                                                                                                                               |
| November 12  | Keep 1.5m distance in places without mandatory covid certificate; Non-essential stores must close at 18:00h; Cafes, bars and restaurants must close at 20:00; Events must stop at 17:00h and visitors must have a fixed seat with a maximum of 1.250 visitors; No audience at sports competitions; Assembly ceiling lowered to 75 people per room in MBO, HBO and                                                                                    |

|                                |                                                                                                                                                                                                                                                                                                                                                                                        |
|--------------------------------|----------------------------------------------------------------------------------------------------------------------------------------------------------------------------------------------------------------------------------------------------------------------------------------------------------------------------------------------------------------------------------------|
|                                | universities; Work from home; Assembly ceiling is lowered to 4 visitors (>12 years) at home per day.                                                                                                                                                                                                                                                                                   |
| November 26                    | Everything must close at 17:00h, except for essential stores which must close at 20:00h; Teachers and students at primary and secondary school must wear a mask and test regularly.                                                                                                                                                                                                    |
| December 14                    | Primary schools and day care close a week before Christmas holidays.                                                                                                                                                                                                                                                                                                                   |
| December 19                    | <b>Lockdown:</b> Stay at home if possible; Assembly ceiling of 2 persons or 1 household outside; Assembly ceiling lowered to 2 visitors (>12 years) at home per day; Closure of publicly accessible locations and schools.                                                                                                                                                             |
| <b>2022</b>                    |                                                                                                                                                                                                                                                                                                                                                                                        |
| January 10                     | Reopening of primary and secondary schools and day care.                                                                                                                                                                                                                                                                                                                               |
| January 15                     | Reopening of MBO, HBO and universities, cultural lessons inside and outside (without audience), sporting facilities inside and outside; Non-essential shops must close at 17:00, Essential shops must close at 20:00, contact professions must close at 17:00; It is advised to wear a mask; Assembly ceiling increased to 4 visitors (>12 years) at home per day.                     |
| January 26                     | Cafes, bars, restaurants, theaters, cinemas, museums, concert halls, zoos and theme parks are open between 5:00-22:00 under the conditions of a covid certificate, wearing a mask, and fixed seats; Reopening of events inside and outside with fixed seats and an assembly ban of more than 1.250 visitors (festivals are not allowed); Audience is permitted at sports competitions. |
| February 15                    | No assembly ceiling for visitors at home; Working from home 50% of the time.                                                                                                                                                                                                                                                                                                           |
| February 18                    | Everything is allowed to be open until 01:00; With a covid certificate it is no longer obligated to be seated during events and to wear masks.                                                                                                                                                                                                                                         |
| February 25                    | Everything is allowed to have normal opening hours; End of the 1.5m distance regulation; End of the obligatory seated events; It is only obligated to wear a mask at public transport and the Dutch airports; It is no longer obligated to make use of the covid certificate.                                                                                                          |
| March 15                       | All regulations are converted into advices.                                                                                                                                                                                                                                                                                                                                            |
| March 23                       | It is no longer obligated to wear a mask in public transport.                                                                                                                                                                                                                                                                                                                          |
| May 20                         | It is no longer obligated to wear a mask at the Dutch airports.                                                                                                                                                                                                                                                                                                                        |
| <b>Testing policy timeline</b> |                                                                                                                                                                                                                                                                                                                                                                                        |
| <b>2020</b>                    |                                                                                                                                                                                                                                                                                                                                                                                        |
| April 6                        | Testing only for citizens who experience COVID-19 symptoms for at least 24 hours AND accommodate specific criteria (e.g. key workers in healthcare and other key professions such as law enforcement, and people with a high risk of severe COVID-19 disease) at the Municipal Health Service.                                                                                         |
| May 6                          | Testing also for teachers and day care personnel who experience COVID-19 symptoms for at least 24 hours at the Municipal Health Service.                                                                                                                                                                                                                                               |
| May 11                         | Testing also for the majority of the contact professions who experience COVID-19 symptoms for at least 24 hours at the Municipal Health Service.                                                                                                                                                                                                                                       |
| May 18                         | Testing also for informal care givers who experience COVID-19 symptoms for at least 24 hours at the Municipal Health Service.                                                                                                                                                                                                                                                          |
| June 1                         | Testing of any citizen experiencing COVID-19 symptoms at the Municipal Health Service.                                                                                                                                                                                                                                                                                                 |
| December 1                     | Testing of citizens without COVID-19 symptoms when they have been in contact with a SarS-CoV-2 positive person at the Municipal Health Service.                                                                                                                                                                                                                                        |

|                                      |                                                                                                                                                                                   |
|--------------------------------------|-----------------------------------------------------------------------------------------------------------------------------------------------------------------------------------|
| <b>2021</b>                          |                                                                                                                                                                                   |
| March 31                             | Everyone can buy COVID-19 self-tests in the Dutch pharmacies, but testing at the Municipal Health Service is still required.                                                      |
| December 2                           | Citizens with COVID-19 symptoms can perform self-test or go to the Municipal Health Service for a test. A positive self-test should be confirmed at the Municipal Health Service. |
| <b>2022</b>                          |                                                                                                                                                                                   |
| March 15                             | No more need to test without experiencing of COVID-19 symptoms.                                                                                                                   |
| April 11                             | Everyone can use a self-test when experiencing COVID-19 symptoms, it is no longer mandatory to confirm this at the Municipal Health Service.                                      |
| <b>Vaccination strategy timeline</b> |                                                                                                                                                                                   |
| <b>2021</b>                          |                                                                                                                                                                                   |
| January 6                            | Start of first vaccination round for key healthcare workers.                                                                                                                      |
| January 18                           | Start of first vaccination round for nursing home residents.                                                                                                                      |
| January 29                           | Start of first vaccination round for every citizen $\geq 18$ years (start with the eldest age groups).                                                                            |
| July 2                               | Start of first vaccination round for teenagers (12-17 years).                                                                                                                     |
| November 18-23                       | Start of first booster round for citizens 60-80+, nursing home residents and healthcare workers with patient contact.                                                             |
| December 20                          | Start of first vaccination round for children (5-11 years) with a high-risk medical indication.                                                                                   |
| <b>2022</b>                          |                                                                                                                                                                                   |
| January 18                           | Start of first vaccination round for children (5-11 years) without a medical indication.                                                                                          |
| January 6                            | Start of first booster round for every citizen $\geq 18$ years.                                                                                                                   |
| February 24                          | Start of second booster round for 70+ citizens, nursing home residents and citizens with severely compromised resistance.                                                         |
| March 7                              | Start of first booster round for teenagers (12-17 years).                                                                                                                         |
| September 19                         | Start of second booster vaccination round for every citizen $\geq 12$ years (start with key healthcare workers and people with a high risk of severe COVID-19 disease).           |

The information depicted by this table is available from:

1. The National Institute for Public Health and the Environment (In Dutch: Rijksinstituut voor Volksgezondheid en Milieu (RIVM)) from <https://www.rivm.nl/gedragsonderzoek/tijdlijn-maatregelen-covid>
2. The Dutch Government (In Dutch: Rijksoverheid) from
  - a. <https://www.rijksoverheid.nl/onderwerpen/coronavirus-tijdlijn>
  - b. <https://www.rijksoverheid.nl/onderwerpen/coronavirus-vaccinatie/nieuws>

**Table S2.** Overview of ethics approval information per cohort

| Cohort acronym | Corresponding MREC                                                       | MREC Registration ID                                                                             | Additional cohort registration               |
|----------------|--------------------------------------------------------------------------|--------------------------------------------------------------------------------------------------|----------------------------------------------|
| Adelante       | MREC Zuyderland                                                          | METCZ20200086                                                                                    | n.a.                                         |
| CAPACITY-COVID | MREC Utrecht                                                             | CAPACITY 1: 20-161/C<br>CAPACITY 2: 21-097/M<br>DEFENCE: 21-532/C                                | ClinicalTrials.gov:<br>NCT04325412           |
| COVAS          | MREC Oost Nederland                                                      | NL74101.091.20                                                                                   | n.a.                                         |
| DC&TC          | n.a.                                                                     | n.a.                                                                                             | n.a.                                         |
| ELVIS          | MREC Z - Zuyderland                                                      | METCZ20200121                                                                                    | n.a.                                         |
| MaastrICcht    | MREC Maastricht University<br>Medical Center+ / Maastricht<br>University | Follow Up cohort: 2020-2368-A-2;<br>2020-2368-A-1; 2020-2368<br>Initial cohort: 2020-1565/300523 | The Netherlands<br>Trial Register:<br>NL8613 |
| POPCOrn        | MREC Erasmus Medical<br>Center, Rotterdam                                | MEC-2020-0266                                                                                    | n.a.                                         |

**Abbreviations:** CAPACITY-COVID: Cardiac complications in patients with COVID-19 cohorts; COVAS: Bernhoven Early detection of Vascular damage after COVID-19 cohort; DC&TC cohort: Dutch COVID & Thrombosis Consortium cohort; ELVIS: ZuydErLand COVID-19 regiStry; MaastrICcht: Maastricht Intensive Care COVID cohort; MREC: Medical Research Ethics Committee; n.a.: not applicable; POPCOrn: POPulation health impact of the COVID-19 pandemic

# BMJ Open

## Prevalence, pathophysiology, prediction and health-related quality of life of long COVID: study protocol of the longitudinal multiple cohort CORona Follow Up (CORFU) study

|                               |                                                                                                                                                                                                                                                                                                                                                                                                                                                                                                                                                                                                                                                                                                                                                                                                                                                                                                                                                                                                                                                                                                                                                                                                                                                                                                                                                                                                                                                                                                                                                                                                                                                                                                                                                                                                                                                                                                                                                                                                                                                                                                                                                                                                                                                                                                    |
|-------------------------------|----------------------------------------------------------------------------------------------------------------------------------------------------------------------------------------------------------------------------------------------------------------------------------------------------------------------------------------------------------------------------------------------------------------------------------------------------------------------------------------------------------------------------------------------------------------------------------------------------------------------------------------------------------------------------------------------------------------------------------------------------------------------------------------------------------------------------------------------------------------------------------------------------------------------------------------------------------------------------------------------------------------------------------------------------------------------------------------------------------------------------------------------------------------------------------------------------------------------------------------------------------------------------------------------------------------------------------------------------------------------------------------------------------------------------------------------------------------------------------------------------------------------------------------------------------------------------------------------------------------------------------------------------------------------------------------------------------------------------------------------------------------------------------------------------------------------------------------------------------------------------------------------------------------------------------------------------------------------------------------------------------------------------------------------------------------------------------------------------------------------------------------------------------------------------------------------------------------------------------------------------------------------------------------------------|
| Journal:                      | <i>BMJ Open</i>                                                                                                                                                                                                                                                                                                                                                                                                                                                                                                                                                                                                                                                                                                                                                                                                                                                                                                                                                                                                                                                                                                                                                                                                                                                                                                                                                                                                                                                                                                                                                                                                                                                                                                                                                                                                                                                                                                                                                                                                                                                                                                                                                                                                                                                                                    |
| Manuscript ID                 | bmjopen-2022-065142.R2                                                                                                                                                                                                                                                                                                                                                                                                                                                                                                                                                                                                                                                                                                                                                                                                                                                                                                                                                                                                                                                                                                                                                                                                                                                                                                                                                                                                                                                                                                                                                                                                                                                                                                                                                                                                                                                                                                                                                                                                                                                                                                                                                                                                                                                                             |
| Article Type:                 | Protocol                                                                                                                                                                                                                                                                                                                                                                                                                                                                                                                                                                                                                                                                                                                                                                                                                                                                                                                                                                                                                                                                                                                                                                                                                                                                                                                                                                                                                                                                                                                                                                                                                                                                                                                                                                                                                                                                                                                                                                                                                                                                                                                                                                                                                                                                                           |
| Date Submitted by the Author: | 19-Oct-2022                                                                                                                                                                                                                                                                                                                                                                                                                                                                                                                                                                                                                                                                                                                                                                                                                                                                                                                                                                                                                                                                                                                                                                                                                                                                                                                                                                                                                                                                                                                                                                                                                                                                                                                                                                                                                                                                                                                                                                                                                                                                                                                                                                                                                                                                                        |
| Complete List of Authors:     | <p>Ghossein-Doha, Chahinda; Maastricht UMC+, Department of Cardiology; Maastricht University, Cardiovascular Research Institute Maastricht (CARIM)</p> <p>Wintjens, Marieke SJN; Maastricht UMC+, Department of Clinical Epidemiology and Medical Technology Assessment; Maastricht UMC+, Intensive Care Medicine</p> <p>Janssen, Emma BNJ; Maastricht UMC+, Department of Obstetrics and Gynaecology; Maastricht University, Cardiovascular Research Institute Maastricht (CARIM)</p> <p>Klein, Dorthe; Maastricht UMC+, Department of Clinical Epidemiology and Medical Technology Assessment; Maastricht University, Care and Public Health Research Institute (CAPHRI)</p> <p>Heemskerk, Stella; Maastricht UMC+, Department of Clinical Epidemiology and Medical Technology Assessment; Maastricht University, Care and Public Health Research Institute (CAPHRI)</p> <p>Asselbergs, Folkert; University Medical Centre Utrecht, Department of Cardiology; University College London, Institute of Cardiovascular Science, Faculty of Population Health Sciences, Health Data Research UK and Institute of Health Informatics</p> <p>Birnie, Erwin ; EuroQol Research Foundation; University Medical Centre Groningen, Department of Genetics</p> <p>Bonsel, Gouke J.; EuroQol Research Foundation</p> <p>van Bussel, Bas; Maastricht UMC+, Department of Intensive Care; Maastricht University, Care and Public Health Research Institute (CAPHRI)</p> <p>Cals, Jochen; Maastricht University, Department of Family Medicine; Maastricht University, Care and Public Health Institute (CAPHRI)</p> <p>Ten Cate, Hugo; Maastricht UMC+, Department of Biochemistry, Department of Internal Medicine, Thrombosis Expert Centre; Maastricht University, Department of Biochemistry, Cardiovascular Research Institute Maastricht (CARIM)</p> <p>Haagsma, Juanita; Erasmus MC, Department of Public Health</p> <p>Hemmen, Bena; Maastricht University, Department of Rehabilitation Medicine, Functioning, Participation &amp; Rehabilitation; Maastricht University, Care and Public Health Institute (CAPHRI)</p> <p>van der Horst, Iwan; Maastricht University Medical Centre+, Department of Intensive Care; Maastricht University, Cardiovascular Research Institute Maastricht (CARIM)</p> |



|                                 |                                                                                                                                                                                                                                                                                                                                                                                                                                                                                                                                                                                                                                                                                                                                                                                                                                                                                                                                                                                                                                                                                                                                                                                    |
|---------------------------------|------------------------------------------------------------------------------------------------------------------------------------------------------------------------------------------------------------------------------------------------------------------------------------------------------------------------------------------------------------------------------------------------------------------------------------------------------------------------------------------------------------------------------------------------------------------------------------------------------------------------------------------------------------------------------------------------------------------------------------------------------------------------------------------------------------------------------------------------------------------------------------------------------------------------------------------------------------------------------------------------------------------------------------------------------------------------------------------------------------------------------------------------------------------------------------|
|                                 | Kietselaer, Bastiaan; Zuyderland Medical Centre Heerlen, Department of Cardiology; Mayo Clinic, Department of Cardiovascular Disease<br>Klok, Frederikus; Leiden University Medical Center, Department of Thrombosis and Hemostasis<br>de Kruif, Martijn; Zuyderland Medical Centre Heerlen, Department of Pulmonology<br>Linschoten, Marijke; University Medical Centre Utrecht, Department of Cardiology; Netherlands Heart Institute<br>van Santen, Susanne; Maastricht UMC+, Department of Intensive Care; Maastricht University, Care and Public Health Institute (CAPHRI)<br>Vernooy, Kevin; Maastricht UMC+, Department of Cardiology; Maastricht University, Cardiovascular Research Institute Maastricht (CARIM)<br>Willems, Loes H.; Radboudumc Radboud Institute for Health Sciences, Department of Surgery<br>Westerborg, Rosa; Zuyderland Medical Centre Heerlen, Department of Pulmonology<br>Warle, Michiel; Radboudumc Radboud Institute for Health Sciences, Department of Surgery<br>van Kuijk, Sander; Maastricht UMC+, Department of Clinical Epidemiology and Medical Technology Assessment; Maastricht University, Care and Public Health Institute (CAPHRI) |
| <b>Primary Subject Heading</b>: | Epidemiology                                                                                                                                                                                                                                                                                                                                                                                                                                                                                                                                                                                                                                                                                                                                                                                                                                                                                                                                                                                                                                                                                                                                                                       |
| Secondary Subject Heading:      | Public health, Infectious diseases                                                                                                                                                                                                                                                                                                                                                                                                                                                                                                                                                                                                                                                                                                                                                                                                                                                                                                                                                                                                                                                                                                                                                 |
| Keywords:                       | COVID-19, EPIDEMIOLOGY, Protocols & guidelines < HEALTH SERVICES ADMINISTRATION & MANAGEMENT, Public health < INFECTIOUS DISEASES                                                                                                                                                                                                                                                                                                                                                                                                                                                                                                                                                                                                                                                                                                                                                                                                                                                                                                                                                                                                                                                  |
|                                 |                                                                                                                                                                                                                                                                                                                                                                                                                                                                                                                                                                                                                                                                                                                                                                                                                                                                                                                                                                                                                                                                                                                                                                                    |

SCHOLARONE™  
Manuscripts

1  
2  
3 **Prevalence, pathophysiology, prediction and health-related quality of life of long COVID:**  
4 **study protocol of the longitudinal multiple cohort CORona Follow Up (CORFU) study**  
5  
6

7 **AUTHORS AND AFFILIATIONS**

8 C Ghossein-Doha\*, MSJN Wintjens\*, EBNJ Janssen, DO Klein, SCM Heemskerk, FW  
9 Asselbergs, E Birnie, GJ Bonsel, BCT van Bussel, JWL Cals, H ten Cate, JA Haagsma, B  
10 Hemmen, ICC van der Horst, BLJH Kietselaer, FA Klok, MD de Kruif, M Linschoten, S van  
11 Santen, K Vernooy, LH Willems, R Westerborg, MC Warlé, SMJ van Kuijk  
12  
13

14 \* Equal contribution  
15

16 **Corresponding author:** SMJ van Kuijk, Department of Clinical Epidemiology and Medical  
17 Technology Assessment, Care and Public Health Research Institute (CAPHRI), Maastricht  
18 University Medical Center+, Maastricht, P.O. Box 5800, 6202 AZ, The Netherlands,  
19 [sander.van.kuijk@mumc.nl](mailto:sander.van.kuijk@mumc.nl)  
20  
21

22  
23 **Co-authors:**

24 Chahinda Ghossein-Doha  
25 Department of Obstetrics and Gynaecology, Cardiovascular Research Institute Maastricht  
26 (CARIM), Maastricht University Medical Center+, Maastricht, The Netherlands.  
27 Department of Cardiology, Cardiovascular Research Institute Maastricht (CARIM), Maastricht  
28 University Medical Center+, Maastricht, The Netherlands.  
29

30  
31 Marieke SJN Wintjens  
32 Department of Clinical Epidemiology and Medical Technology Assessment, Care and Public  
33 Health Research Institute (CAPHRI), Maastricht University Medical Center+, Maastricht, The  
34 Netherlands.  
35 Department of Intensive Care Medicine, Care and Public Health Research Institute (CAPHRI),  
36 Maastricht University Medical Center+, Maastricht, The Netherlands.  
37  
38

39  
40 Emma BNJ Janssen  
41 Department of Obstetrics and Gynaecology, Cardiovascular Research Institute Maastricht  
42 (CARIM), Maastricht University Medical Center+, Maastricht, The Netherlands.  
43 Department of Clinical Epidemiology and Medical Technology Assessment, Care and Public  
44 Health Research Institute (CAPHRI), Maastricht University Medical Center+, Maastricht, The  
45 Netherlands.  
46  
47

48 Dorte O Klein  
49 Department of Clinical Epidemiology and Medical Technology Assessment, Care and Public  
50 Health Research Institute, Maastricht University Medical Center+, Maastricht, The  
51 Netherlands.  
52  
53

54 Stella CM Heemskerk  
55 Department of Clinical Epidemiology and Medical Technology Assessment, Care and Public  
56 Health Research Institute (CAPHRI), Maastricht University Medical Center+, Maastricht, The  
57 Netherlands.  
58  
59  
60

1  
2  
3 Folkert W Asselbergs

4 Department of Cardiology, University Medical Center Utrecht, Utrecht University, The  
5 Netherlands.

6  
7 Institute of Cardiovascular Science, Faculty of Population Health Sciences, University College  
8 London, London, United Kingdom.

9 Health Data Research UK and Institute of Health Informatics, University College London,  
10 London, United Kingdom.  
11

12  
13 Erwin Birnie

14 EuroQol Group Executive Office, Rotterdam, The Netherlands.

15 Department of Genetics, University Medical Center Groningen, University of Groningen,  
16 Groningen, The Netherlands  
17

18  
19 Gouke J Bonsel

20 EuroQol Group Executive Office, Rotterdam, The Netherlands.  
21

22  
23 Bas CT van Bussel

24 Department of Intensive Care Medicine, Care and Public Health Research Institute (CAPHRI),  
25 Maastricht University Medical Center+, Maastricht, The Netherlands.  
26

27  
28 Jochen WL Cals

29 Department of Family Medicine, Care and Public Health Research Institute (CAPHRI),  
30 Maastricht University, Maastricht, The Netherlands.  
31

32  
33 Hugo ten Cate

34 Department of Biochemistry, Cardiovascular Research Institute Maastricht (CARIM),  
35 Maastricht University, Maastricht, The Netherlands.

36 Department of Internal Medicine, Maastricht University Medical Center+, Maastricht, The  
37 Netherlands.

38 Thrombosis Expert Centre Maastricht, Maastricht University Medical Center+, Maastricht,  
39 The Netherlands.  
40

41  
42 Juanita A Haagsma

43 Department of Public Health, Erasmus University Medical Center Rotterdam, Rotterdam, The  
44 Netherlands.  
45

46  
47 Bena Hemmen

48 Department of Rehabilitation Medicine, Functioning, Participation & Rehabilitation, Care and  
49 Public Health Research Institute (CAPHRI), Maastricht University, The Netherlands.

50 Adelante Centre of Expertise in Rehabilitation and Audiology, Hoensbroek, The Netherlands.  
51

52  
53 Iwan CC van der Horst

54 Department of Intensive Care Medicine, Cardiovascular Research Institute Maastricht  
55 (CARIM), Maastricht University Medical Center+, Maastricht, The Netherlands.  
56

57  
58 Bas LJH Kietselaer

59 Department of Cardiovascular Diseases, Mayo Clinic, Rochester, Minnesota, Unites States.  
60

1  
2  
3 Department of Cardiology, Zuyderland Medical Center, Heerlen, The Netherlands.  
4

5 Frederikus A Klok

6 Department of Medicine - Thrombosis and Hemostasis, Leiden University Medical Center,  
7 Leiden, The Netherlands.  
8  
9

10 Martijn D de Kruif

11 Department of Pulmonology, Zuyderland Medical Center, Heerlen, The Netherlands.  
12  
13

14 Marijke Linschoten

15 Department of Cardiology, University Medical Center Utrecht, Utrecht University, The  
16 Netherlands; Netherlands Heart Institute, Utrecht, The Netherlands.  
17  
18

19 Susanne van Santen

20 Department of Intensive Care Medicine, Care and Public Health Research Institute (CAPHRI),  
21 Maastricht University Medical Center+, Maastricht, The Netherlands.  
22  
23

24 Kevin Vernooy

25 Department of Cardiology, Cardiovascular Research Institute Maastricht (CARIM), Maastricht  
26 University Medical Center+, Maastricht, The Netherlands.  
27  
28

29 Loes H Willems

30 Department of Surgery, Radboud Institute of Health Sciences (RIHS), Radboud University  
31 Medical Center, Nijmegen, The Netherlands  
32  
33

34 Rosa Westerborg

35 Department of Pulmonology, Zuyderland Medical Center, Heerlen, The Netherlands.  
36  
37

38 Michiel C Warlé

39 Department of Surgery, Radboud Institute of Health Sciences (RIHS), Radboud University  
40 Medical Center, Nijmegen, The Netherlands.  
41  
42

43 Sander MJ van Kuijk

44 Department of Clinical Epidemiology and Medical Technology Assessment, Care and Public  
45 Health Research Institute (CAPHRI), Maastricht University Medical Center+, Maastricht, The  
46 Netherlands  
47  
48

49 **Word count:** 4.086

50 **Keywords:** Long COVID, PACS (Post-Acute sequelae SARS-CoV-2 infection), protocol, multiple  
51 cohort study, epidemiology, prediction model  
52  
53  
54  
55  
56  
57  
58  
59  
60

## ABSTRACT

**Introduction** The variety, time patterns and long term prognosis of persistent COVID-19 symptoms (long COVID) in patients who suffered from mild to severe acute COVID-19 are incompletely understood. Cohort studies will be combined to describe the prevalence of long COVID symptoms, and to explore the pathophysiological mechanisms and impact on health-related quality of life. A prediction model for long COVID will be developed and internally validated to guide care in future patients.

**Methods and analysis** Data from seven COVID-19 cohorts will be aggregated in the longitudinal multiple cohort CORona Follow Up (CORFU) study. CORFU includes Dutch patients who suffered from COVID-19 at home, were hospitalized without or with intensive care unit treatment, needed inpatient or outpatient rehabilitation, and controls who did not suffer from COVID-19. Individual cohort study designs were aligned and follow-up has been synchronized. Cohort participants will be followed up for a maximum of 24 months after acute infection. Next to the clinical characteristics measured in individual cohorts, the CORFU questionnaire on long COVID outcomes and determinants will be administered digitally at 3, 6, 12, 18 and 24 months after the infection. The primary outcome is the prevalence of long COVID symptoms up to two years after acute infection. Secondary outcomes are health-related quality of life (e.g. EQ-5D), physical functioning, and the prevalence of thromboembolic complications, respiratory complications, cardiovascular diseases and endothelial dysfunction. A prediction model and a patient platform prototype will be developed.

**Ethics and dissemination** Approval was obtained from the medical research ethics committee of Maastricht University Medical Center+ and Maastricht University (METC 2021-2990) and local committees of the participating cohorts. The project is supported by ZonMW and EuroQol Research Foundation. Results will be published in open access peer-reviewed scientific journals and presented at (inter)national conferences.

**Trial registration number** ClinicalTrials.gov Identifier: NCT05240742

## Article summary

### Strengths and limitations of this study

- ◆ Survivors from seven existing COVID-19 cohorts will be asked to participate in CORFU; clinical data will be aggregated and enriched with results from questionnaires on symptoms, health-related quality of life and societal impact at synchronized follow-up moments to estimate the prevalence and pathophysiological mechanisms of long COVID, the impact on health-related quality of life, and their key determinants.
- ◆ A control group of Dutch participants from the general population, who did not suffer from COVID-19, will be included for comparison with regard to the prevalence and health-related quality of life.
- ◆ The heterogeneous cohort populations enable CORFU to investigate study aims in various subgroups (e.g. home-isolated versus hospitalized patients) and test pathophysiological hypotheses.
- ◆ An overrepresentation of (former) COVID-19 patients admitted to the hospital (ward or intensive care unit) might exist, potentially resulting in overrepresentation of more severe cases of long COVID, all of which will be considered in the analysis and presentation.

## INTRODUCTION

The World Health Organization (WHO) defines the post-COVID-19 condition, also known as long COVID, as a condition that occurs three months from the onset of infection, with symptoms that last for at least two months and are not explained by an alternative diagnosis.<sup>1</sup> The prevalence of long COVID symptoms varies in literature, ranging from 40% and 68% six months after COVID-19 diagnosis and up to 49% after twelve months.<sup>2-4</sup> Frequently reported symptoms include fatigue, shortness of breath, headache, cognitive impairment (e.g. concentration problems), muscle weakness and joint stiffness.<sup>5-8</sup> Persistent long COVID symptoms are associated with poorer health-related quality of life.<sup>9 10</sup> Furthermore, there is an increased risk of incident cardiovascular complaints and cardiovascular diseases for people who suffered from COVID-19 beyond the first month of infection.<sup>11 12</sup> Next to the physical and mental symptoms of long COVID, there is a psychological and emotional impact which might be induced by the social restrictions and financial impact (including income uncertainty) during the pandemic.<sup>13 14</sup>

Long COVID occurs both in patients with mild and with severe acute course. So far, the severity of the acute infection seems related to the risk of long COVID symptoms.<sup>15-17</sup> Additional factors affecting the risk of long COVID are the presence of one or more pre-existent comorbidities and being a middle-aged female.<sup>16 18 19</sup> Whether the type of severe acute respiratory syndrome coronavirus 2 (SARS-CoV-2) strain relates to long COVID is unknown.

In patients suffering from critical COVID-19 in the ICU, long COVID symptoms may co-exist with, or be indistinguishable from, the post-IC syndrome (PICS), defined as newly emerging physical, cognitive, or mental limitations after suffering from severe disease during ICU stay.<sup>20</sup>

Due to the novelty of COVID-19, studies focus on short term physical functioning and mental well-being. However, less is known about persisting COVID-19 symptoms up to two years after acute infection, and the factors determining prognosis (if any). More knowledge will facilitate long COVID (health)care and follow-up (e.g. specific services such as (lung)rehabilitation and occupational support) for specific patient groups, guided by prognostic information. This knowledge may translate into national and international guidelines on the prevention, diagnosis, and treatment of long COVID.

This paper describes the protocol of the CORona Follow Up (CORFU) study: a national longitudinal, multiple cohort study that aggregates data of existing cohorts and enriches these data with repeated digital follow-up questionnaires on long COVID symptoms and health-related quality of life up to two years after the first infection. Five aims, summarized in four work packages (WP), have been formulated:

- ◆ WP1:
  - a) To describe the prevalence, severity, time patterns and duration of long COVID symptoms up to two years after acute infection and their relationship with health-related quality of life.
  - b) To describe the received rehabilitation and paramedical support in relation to the persisting symptoms and health-related quality of life.
- ◆ WP2:

To investigate the pathophysiological mechanisms that may cause long COVID symptoms and the role of vulnerability/resilience factors.

- ◆ WP3:  
To develop and validate a prediction model for the persistence of symptoms, stratified by severity of COVID-19.
- ◆ WP4 (in collaboration with EuroQol Research Foundation):  
Develop a patient platform prototype where patients can digitally consult their reported outcomes, compare them with previous outcomes, relate to reference information, and find reported information that fits their situation.

## METHODS AND ANALYSIS

### Study design

The CORFU study is a longitudinal multiple cohort study that aggregates data of seven existing Dutch COVID-19 cohorts, prospectively complemented with routinely collected outcome data on long COVID, with a maximum follow-up of 24 months after initial infection. Data will be collected between October, 1, 2021 and December 31, 2022.

All cohorts were initiated and designed to conduct COVID-19 research. Six cohorts will collect data according to their individual clinical focus (Figure 1). In addition, participants from the community-based POPulation health impact of the COVID-19 pandemic (POPCOrn) cohort will serve as a control group as this cohort partly consists of controls who did not suffer from COVID-19. However, at present, many of the POPCOrn participants could have suffered from (mild) COVID-19. Therefore, all POPCOrn participants will be asked repeatedly to report whether or not they suffered from (confirmed or suspected) COVID-19 and only the participants who did not suffer from COVID-19 will serve as a control. In the POPCOrn cohort, similar outcome data will be collected as in the other participating cohorts. As CORFU is open to new collaborations, it is likely that additional cohorts will join CORFU in the future. Participation of new cohorts will be reported when presenting the CORFU study findings.

The cohort-specific follow-up measurements will be complemented by a repeatedly administered CORFU questionnaire covering the full array of long COVID symptoms, health-related quality of life effects, and their key determinants. Furthermore, (clinical) data that has already been collected in the participating cohorts during the acute COVID-19 stage will be used to investigate the CORFU study aims.

### Participants

The study population consists of Dutch (former) COVID-19 survivors and non-COVID-19 controls, who have been included in one of the cohorts. Former COVID-19 cases are either confirmed by a positive PCR test for SARS-CoV-2 and/or a positive CT scan of the chest based on the COVID-19 Reporting and Data System (CO-RADS) Score (score 4-5 by a radiologist), or likely based on self-reported questionnaires (i.e. unspecified positive COVID-19 test or the presence of COVID-19-related symptoms). The study population is categorized into five subgroups:

- ◆ Patients who suffered from confirmed COVID-19 admitted to the hospital ward;
- ◆ Patients who suffered from confirmed COVID-19 admitted to the ICU;
- ◆ Patients who suffered from either confirmed or likely (i.e. self-reported) COVID-19 at home;
- ◆ Patients who suffered from confirmed COVID-19 and needed inpatient or outpatient rehabilitation after infection at home or in the hospital (ward and/or ICU);

- ◆ Controls who (likely, i.e. self-reported) did not suffer from COVID-19.

Adult participants ( $\geq 18$  years) with confirmed or suspected COVID-19 and non-COVID-19 controls who sufficiently master the Dutch language will be eligible for inclusion in the CORFU study. No additional exclusion criteria will be used. In addition to provided consent or no declared objection for initial cohort participation, all participants will be asked to give written and/or digital informed consent prior to the first CORFU follow-up questionnaire (if not already covered by the specific cohort inclusion scheme).

#### **Data sources: COVID-19 cohorts**

Data will be derived from the following seven COVID-19 cohorts:

- ◆ Adelante cohort<sup>21</sup>;
- ◆ Bernhoven early detection of vascular damage after COVID-19 (COVAS) cohort<sup>22</sup>;
- ◆ Cardiac complications in patients with COVID-19 (CAPACITY-COVID) cohort<sup>23 24</sup>;
- ◆ Dutch COVID and Thrombosis Consortium (DC&TC) cohort<sup>25</sup>;
- ◆ MaastrICCh cohort<sup>26</sup>;
- ◆ POPulation health impact of the COVID-19 pandemic (POPCOrn) cohort<sup>27</sup>;
- ◆ ZuydErLand COVID-19 regiStry (ELVIS) cohort<sup>28</sup>.

Figure 1 shows the aims, study population, and outcomes of each cohort. Electronic case report forms will be used to facilitate data aggregation in order to answer the CORFU study aims. Moreover, the study designs of the majority of the individual cohorts have been aligned in the conceptualization phase. This includes synchronization of the follow-up moments during which CORFU data will be collected prospectively, as well as a synchronization of the additional (clinical) data that will be collected in the individual cohorts, including their level of measurement.

In May 2022, the total source population of the participating cohorts included 12,631 participants. However, the total number of CORFU participants will be lower, as it depends on the survival and the CORFU response rates in the individual cohorts, as well as the number of participants which are included in multiple cohorts. In addition, five out of seven cohorts are prospectively including new patients. The CORFU study population will be described in more detail when reporting the study findings.

#### **Data collection: CORFU questionnaire**

Besides the clinical data collection in the cohorts, the CORFU questionnaire will be periodically administered to study participants up to two years after suffering from COVID-19. The CORFU questionnaire is based on an internationally developed basic questionnaire on persistent symptoms after COVID-19.<sup>27</sup> It is digitally adaptive and includes questions on the following outcomes and determinants:

##### *Outcomes:*

- ◆ Long COVID symptoms, with a 5-level severity scale;
- ◆ Health-related quality of life (EQ-5D-5L, EQ-VAS);
- ◆ Anxiety and depression (HADS, GAD-2, PHQ-2);
- ◆ Social participation and connectedness;
- ◆ Experienced stigmatization and resilience;



- ◆ Consequences for employment status and personal income.

#### *Determinants:*

- ◆ COVID-19 related factors (e.g. date of diagnosis and/or clinical admission, severity, wave as surrogate for SARS-CoV-2 strain);
- ◆ Socio-demographic and diversity factors (e.g. age, sex, gender, socio-economic);
- ◆ Presence of chronic disease or pre-existing vulnerability;
- ◆ Impact on healthcare access and experienced quality, healthcare avoidance and self-care;
- ◆ Vaccination status at the moment of acute infection.

The CORFU questionnaire will be digitally administered at 3, 6, 12, 18 and 24 months after COVID-19 via a web-based survey or, if requested, on paper. On an individual level, the follow-up moments on which the CORFU questionnaire will be administered depends on the date of first infection (diagnosis and/or admission). In retrospect, not all follow-up moments will apply to all participants. As the CORFU study duration is 15 months, participants will receive a maximum of three CORFU questionnaires. Completing the questionnaire takes, on average, 20-25 minutes, and participants will receive regular reminders to optimize the response rate.

As study participants were included at different time point in the COVID-19 pandemic, depending on their date of first infection, different contextual factors might apply such as lockdowns, the availability of testing material and testing policy, and the vaccination strategy at that time. These factors are presented in detail in Supplementary Table S1.

#### **Outcome variables**

The primary outcome is the prevalence of long COVID symptoms up to two years after infection. Symptoms include, but are not limited to, fatigue, muscle weakness, respiratory complaints, cardiovascular complaints, cognitive impairment, anxiety and depression. Secondary outcomes are health-related quality of life, physical functioning, and the prevalence of thromboembolic complications, respiratory complications, cardiovascular diseases and endothelial dysfunction.

Initially, the WHO definition will be used to define long COVID.<sup>1</sup> Potentially identified long COVID phenotypes as part of WP1 and other international developments within the field will also be further considered throughout the study.

#### **Data management and data safety**

The data will be stored and accessible according to Findability, Accessibility, Interoperability, and Reusability (FAIR) data standards.<sup>29</sup> For this, we will apply a machine-readable metadata scheme. Two trusted third parties will administer the digital questionnaires in the individual cohorts: Durrer Center for Cardiovascular Research, Amsterdam, the Netherlands, and Triqs, Zwolle, the Netherlands. Durrer Center facilitates autonomous and secure data management and is founded by the Netherlands Heart Institute. Triqs is an innovative research agency facilitating data collection through digital questionnaires.

The data flow is as follows. First, Durrer Center will receive participants' contact details from the participating cohorts, check these for any flaws (e.g. missing contact details and duplications) and encrypt the contact details except email prior to sharing these with Triqs. Next, Triqs will invite the participants for consent and, subsequently, for participation

in the CORFU questionnaire. Upon consent, participants will digitally receive the questionnaires. After that, Triqs will store the resulting data records (still encrypted) and send these to Durrer Center. Durrer Center will decrypt and subsequently verify each data record and create a pseudo-anonymized dataset which will be made available to the CORFU research group and the participating cohorts. As part of the data process, obligatory General Data Protection Regulation (GDPR) contracts will be created between the participating hospitals (care units), Durrer Center, Triqs, and the CORFU study unit. In addition, data access agreements will be arranged between the CORFU study unit and the participating cohorts; post-study secondary analysis of the survey data has been agreed upon in collaboration with the EuroQol Research Foundation. Both Durrer Center and Triqs work processes and facilities meet the Dutch privacy legislation standards (International Organization for Standardization (ISO) and NEDerlandse Norm (NEN) norms).

### Work packages and data analysis

This paragraph describes a generic outline of aims and methods of the work packages. Future manuscripts on CORFU work package findings will describe the aims and used methods in more detail. Table 1 displays the work packages (WPs) and the corresponding aims and involved cohorts. Within all WPs, baseline data of participants will be described in detail, stratified by subgroup if necessary. Missing data will be imputed if the percentage of incomplete records exceeds 5% using multiple imputation with fully conditional specification (FCS). The number of imputations will be set to the percentage of incomplete records, and values will be drawn using predictive mean matching.<sup>30</sup> The primary analyses of the WP 1 to 3 aims will be performed with data from CORFU participants who (likely) suffered from COVID-19. Sensitivity analyses will be performed for the subgroup of participants who suffered from confirmed COVID-19 (i.e. positive PCR test for SARS-CoV-2 and/or a CO-RADS Score of 4-5).

**Table 1.** Overview of the work packages, including study aims and cohorts

| WP  | Aim                                                                                                                                                                                                                                                                                                                                     | Cohorts involved <sup>a</sup>                                                                |
|-----|-----------------------------------------------------------------------------------------------------------------------------------------------------------------------------------------------------------------------------------------------------------------------------------------------------------------------------------------|----------------------------------------------------------------------------------------------|
| WP1 | 1. Describe the prevalence, severity, time patterns and duration of long COVID symptoms up to two years after acute infection and their relationship with health-related quality of life.<br>2. Describe the received rehabilitation and paramedical support in relation to the persisting symptoms and health-related quality of life. | Data from all cohorts will be used.                                                          |
| WP2 | 3. Describe the pathophysiological mechanisms that may cause long COVID symptoms and the role of vulnerability/resilience factors.                                                                                                                                                                                                      | Every cohort will deliver results for specific pathophysiological hypotheses.                |
| WP3 | 4. Develop and validate a prediction model for the persistence of symptoms, stratified by severity of COVID-19.                                                                                                                                                                                                                         | Data from all cohorts will be used.                                                          |
| WP4 | 5. Develop a patient platform prototype where patients can digitally consult their reported outcomes, compare them with previous outcomes, relate to reference information, and find reported information that fits their situation.                                                                                                    | The platform will be developed and tested in a limited number of cohorts (to be determined). |

<sup>a</sup> CORFU cohorts include Adelante, CAPACITY-COVID, COVAS, DC&TC, ELVIS, MaastrICht and POPCOrn.

**Abbreviations:** CAPACITY-COVID: Cardiac complications in patients with COVID-19 cohorts; COVAS: Bernhoven Early detection of Vascular damage after COVID-19 cohort; DC&TC cohort: Dutch COVID & Thrombosis

Consortium cohort; ELVIS: ZuydErLand COVID-19 regiSty; MaastrICht: Maastricht Intensive Care COVID cohort; POPCOrn: POPulation health impact of the COVID-19 pandemic; WP: work package.

WP1 will investigate the first and second study aims. First, data of the seven cohorts will be aggregated and used to estimate the prevalence and severity of long COVID symptoms, expressed as a percentage with a 95% confidence interval and as a distribution of severity scores at every follow-up moment. Next, the association between symptom severity and health-related quality of life will be quantified using linear regression analysis and repeated measurements analysis, adjusted for potential confounders. Finally, rehabilitation and paramedical support will be described using descriptive statistics. Analyses will be stratified by participant subgroups (i.e. suffered from COVID-19 at home, admitted to hospital ward, admitted to ICU). Furthermore, long COVID 'phenotypes' (i.e. subtypes: patients with similar expressions of symptoms) will be estimated. Important phenotypes may depend on combinations of previously reported domains of symptoms (e.g. respiratory, cardiovascular), but phenotypes may also depend on previously unidentified combinations. Clusters of patients will be estimated using unsupervised machine learning techniques with K-means and hierarchical clustering, which are data-supportive and thereby not confirmatory (of prior hypotheses) in nature.<sup>31</sup>

WP2 will investigate the third study aim. Each cohort will formulate specific long COVID research questions related to various pathophysiological mechanisms and data availability. Table 2 shows examples of research questions that will be studied. To explore these pathophysiological mechanisms, data of different cohorts will be aggregated when possible. Next, we will develop directed acyclic graphs (DAGs), presenting (presumed) causal relationships based on current knowledge and new hypotheses while considering long COVID phenotypes identified in WP1. Subsequently, multivariable regression modelling will be used to test the various causal models (expressed in DAGs). Confounding, effect modification, and mediation will be considered by testing as model parameters. Associations will be presented as regression coefficients or odds ratios, including 95% confidence intervals. Analyses will be performed separately for the individual cohort data and for the joint cohort data in which the same outcome measures were used.

**Table 2.** Overview of work package 2 (WP2) hypotheses on pathophysiological mechanisms that might cause long COVID symptoms

| Pathophysiological mechanism | Main research questions include, but are not limited to:                                                                                                                                                             | Cohort (minimally) involved |
|------------------------------|----------------------------------------------------------------------------------------------------------------------------------------------------------------------------------------------------------------------|-----------------------------|
| Thromboembolic complications | 1. What is the impact of venous thromboembolic complications on long-term functional outcomes in COVID-19 survivors?                                                                                                 | DC&TC                       |
| Cardiovascular diseases      | 2. What is the impact of myocardial damage during hospital ward or ICU stay due to COVID-19 on angina pectoris and dyspnea over time?                                                                                | CAPACITY-COVID              |
| Endothelial dysfunction      | 3. What is the relationship between elevated inflammation parameters and persistent thrombo-inflammation, coagulation, microvascular and macrovascular dysfunction, and respiratory symptoms after COVID-19 disease? | COVAS                       |
| Multi organ failure          | 4. What is the impact of multi-organ failure during ICU stay on long-term functional outcomes and (health-related) quality of life in COVID-19 survivors?                                                            | MaastrICht                  |
| Pre-existing coronary        | 5. What is the relationship between pre-existing clinical and                                                                                                                                                        | ELVIS                       |
|                              | 6. What is the relationship between pre-existing clinical and                                                                                                                                                        |                             |

|                 |                                                                                                                                                       |          |
|-----------------|-------------------------------------------------------------------------------------------------------------------------------------------------------|----------|
| atherosclerosis | subclinical coronary atherosclerosis, angina pectoris, and respiratory symptoms after COVID-19 infection?                                             |          |
| NA              | 7. What is the level of functioning during the course of disease in patients following a rehabilitation program after COVID-19 related ICU admission? | Adelante |

**Abbreviations:** CAPACITY-COVID: Cardiac complications in patients with COVID-19 cohorts; COVAS: Bernhoven Early detection of Vascular damage after COVID-19 cohort; DC&TC cohort: Dutch COVID & Thrombosis Consortium cohort; ELVIS: ZuydErLand COVID-19 regiStry; MaastrICChT: Maastricht Intensive Care COVID cohort; NA: not applicable; POPCOrn: POPulation health impact of the COVID-19 pandemic

WP3 will investigate the fourth study aim. In order to develop a prediction model, we will aim to identify the set of predictors, measured at time of COVID-19 diagnosis and during the course of the disease, that will maximize the ability to discriminate patients who experience long COVID symptoms from patients who do not experience these symptoms. Potential predictors will be selected from the living review by Wynants et al. and recent literature.<sup>32</sup> Using backward stepwise elimination on the Akaike Information Criterion in logistic regression analysis, the initial model structure and parameters (including follow-up period) will be estimated. Additionally, the model will be internally validated using bootstrapping techniques.

WP4 will address the fifth study aim: developing and testing a patient platform prototype. As the patient platform will be connected to the digital questionnaire platform, individual CORFU questionnaire responses can be presented individually to the corresponding patient. It offers the possibility for patients to consult their own situation, compare this with the past and with the situation of similar patients, profit from suggestions of other patients in similar situations, and gain insight into their future health. The specific content (e.g. which symptom domains and other domains of interest) to be presented in the patient platform will be based on focus groups with healthcare professionals, (former) patients and patient representatives. Patient platforms aim to increase empowerment and reassurance (outcomes tested) and might provide guidance in healthcare-seeking and self-care. By providing feedback on the given answers, the platform increase patients' knowledge and self-consciousness about the potential existence of long COVID-19 symptoms and change over time, thereby putting them in own data-driven control on their health situation.

### Sample size calculation

The sample size for this study is established pragmatically. A heterogeneous sample of COVID-19 patients is included by choosing different cohorts with considerable heterogeneity in the severity of the disease, national coverage and without any exclusion criteria. This resulted in a collection of seven small to very large cohorts. Our sample size calculations of WP1, WP2, and WP3 are based on the smallest subgroup of patients that will be analyzed in this study.

Firstly, for estimating the prevalence of long COVID symptoms (WP1), for the least favorable percentage of 50% (the variance of a percentage is highest at 50%), the maximum width of the 95% confidence interval will be approximately plus and minus 5%. For all other percentages, the confidence interval will be even smaller. Secondly, for investigating the pathophysiological mechanisms that may cause long COVID symptoms (WP2), there will be sufficient power to detect associations with symptom severity, expressed in standardized effect size (Cohen's *d*) of 0.3, with a power of 80% and a type-I error of 5%. Thirdly, for the development of a prediction model for long COVID complaints (WP3), we anticipate a large number of cases, taking into account that 57% of patients suffered from at least one long

1  
2  
3 COVID complaint up to six months after infection.<sup>15</sup> Depending on the response rate and  
4 resulting sample size, we will determine the maximum number of candidate predictors we  
5 can use for multivariable modeling with the method of Riley et al., allowing a maximum  
6 shrinkage of predictor coefficients of 0.9.<sup>33</sup>  
7

8 Statistical tests or estimations are not part of WP4. Therefore, sample size or  
9 statistical power calculations are not applicable for WP4.  
10

### 11 **Patient and public involvement**

12 Patient organizations (Family and patient Centered Intensive Care (FCIC), IC Connect and the  
13 'Hartenraad') and patients of the Maastricht University Medical Centre+ (MUMC+) Intensive  
14 Care panel were involved in the design of the CORFU study. Patients were involved in the  
15 development and testing of the international basic questionnaire on persistent symptoms  
16 after COVID-19, which serves as the basis for the CORFU questionnaire. In addition, patients  
17 provided feedback on the phrasing of questions, the fill-out time of the questionnaire and  
18 the willingness to fill out the questionnaire periodically. Participants will be able to provide  
19 feedback on the (missing) content of the CORFU questionnaire through an open-ended  
20 question. Comments will be discussed and implemented prospectively when deemed  
21 relevant, making the CORFU questionnaire a continuously developing measurement  
22 instrument.  
23

24 Patients will have an advisory role in developing the patient platform prototype  
25 (WP4), which allows patients to digitally consult their answers in real-time and compare  
26 them with reference populations. In addition, advice will be asked on the (type of) provided  
27 feedback questions, the formatting and visualization of answers, and the relevant reference  
28 groups to be considered. Eventually, CORFU findings will be presented in a lay summary, and  
29 a flyer on long COVID will be developed in close collaboration with patients. The  
30 dissemination strategy of CORFU findings and the long COVID flyer will be based on patient  
31 and public preferences, in which also the involved patient organizations will have an  
32 important role.  
33  
34  
35  
36  
37  
38

### 39 **DISCUSSION**

40 The CORFU study has the opportunity to investigate the prevalence, pathophysiological  
41 mechanisms, and prediction of long COVID, and its relationship with health-related quality of  
42 life. CORFU will aggregate data from seven existing COVID-19 cohorts and will enrich the  
43 data with prospective follow-up of long COVID outcomes and determinants up to a  
44 maximum of two years after acute infection. A prediction model and patient platform  
45 prototype will be developed to guide future patient care.  
46

47 Estimation of the prevalence of long COVID symptoms up to two years after  
48 infection, will be based on the multidimensional CORFU questionnaire, including physical  
49 and psychological complaints after COVID-19. The extensive set of physical complaints gives  
50 the opportunity to study symptoms in great detail. The additional focus on psychological  
51 impact addresses the call to take COVID-19 psychopathology into account when designing  
52 new studies. It reflects the current knowledge that mental well-being is worse in patients  
53 who suffered from COVID-19 compared with healthy respondents and that there is a high  
54 rate of mental health complaints up to one year after acute infection.<sup>27 34</sup>  
55

56 CORFU findings may be used to inform national and international guidelines on  
57 diagnostics, treatment and follow-up of long COVID and contribute to developing a (new)  
58 more accurate long COVID definition, likely differentiating long COVID phenotypes. Available  
59  
60

1  
2  
3 guidelines and definitions on long COVID are currently, as expected, based on short-term  
4 follow-up studies, whereas CORFU will report long COVID symptoms up to two years after  
5 infection.<sup>1 35</sup> Besides, the current WHO long COVID definition remains broad and unspecific,  
6 thereby lacking accurate differentiation of its heterogeneous appearance into clinical  
7 phenotypes. Defining such phenotypes with potentially adding clinical parameters  
8 (biomarkers, imaging, etc.) might enhance clinical workability, and thereby diagnostics, and  
9 the development of tailored therapies based on underlying pathophysiology.  
10

11 An important strength of the CORFU study is that data will be aggregated from seven  
12 cohorts of (former) COVID-19 patients. Due to mortality and non-response, the effective  
13 number might be slightly lower. Nevertheless, the large CORFU sample size allows for robust  
14 analysis. Furthermore, the difference in designs of the cohorts allows us to answer study  
15 aims for various subgroups (e.g. COVID-19 at home versus hospitalized (ward and/or ICU))  
16 and to test multiple, detailed, pathophysiological hypotheses, depending on the  
17 characteristics of the patients included in the participating cohorts, also related to COVID-19  
18 variants by using wave at the time of infection as a surrogate marker. Furthermore, the  
19 ability to aggregate data of multiple cohorts is an efficient way of (close) national  
20 collaboration which contributes to more robust and reliable findings compared with  
21 multiple, parallel, single cohort studies with smaller sample sizes.  
22

23 Another strength is that CORFU will use data from a large control group of  
24 respondents who did not suffer from COVID-19. This allows the comparison of the  
25 prevalence of long COVID symptoms with the prevalence of these symptoms in the general  
26 Dutch, non-COVID-19 population, potentially highlighting the secondary impacts of the  
27 pandemic. This is a crucial comparison currently lacking in the majority (79%) of long COVID  
28 research but required to identify and quantify attributable symptoms objectively.<sup>36</sup> For  
29 instance, the (social) restrictions may significantly impact the quality of life and (mental)  
30 well-being of the general population.<sup>13 27 37 38</sup> These factors need to be considered when  
31 analyzing and interpreting the CORFU findings. Lastly, as part of WP4, patients will receive  
32 personalized feedback on their own questionnaire outcomes and those of other patients in  
33 similar situations.  
34

35 Potential limitations of the CORFU study also merit consideration. Firstly, combining  
36 data from seven cohorts is challenging. As each cohort has specific study aims regarding the  
37 pathophysiological processes causing long COVID symptoms, not all cohorts collect the same  
38 (clinical) information from their participants. To ensure that data from all cohorts can be  
39 integrated and that between-cohort comparisons are possible, a minimal set of variables  
40 was (post-hoc) harmonized among the participating cohorts regarding background  
41 characteristics (e.g. socio-demographics, employment status, social, economic status,  
42 cultural background), comorbidities, and potential confounders. Furthermore, to optimize  
43 the data integration process, data received from the cohorts will be transferred into a  
44 machine-readable metadata scheme prior to merging the various datasets. Secondly, there  
45 will be an overrepresentation of (former) COVID-19 patients admitted to the hospital ward  
46 and/or ICU compared to those who suffered from COVID-19 at home. This affects  
47 estimations of long COVID prevalence, which can be evaluated by post-hoc stratification  
48 using community-based cases. The epidemiological basis used for the statistical models to  
49 develop prediction models is independent of in-/outpatient distribution and depends solely  
50 on the associations and interactions found within specific patient groups, as COVID-19  
51 severity will be added as a covariate. Moreover, analyses will be stratified by disease severity  
52 for subgroup-specific conclusions. Thirdly, especially in the first COVID-19 wave (March 1 –  
53  
54  
55  
56  
57  
58  
59  
60

1  
2  
3 June 30, 2020) for non-hospitalized patients, not all suspected COVID-19 cases were tested  
4 due to capacity and test-material constraints in the Netherlands. For CORFU, this means that  
5 there is a lack of confirmed infections for participants of the community-based POPCORN  
6 cohort who self-reported to have (likely) suffered from COVID-19 based on an unspecified  
7 positive test or the presence of COVID-19-related symptoms. In order to reduce the impact  
8 of this limitation, the primary analyses will be repeated in the sensitivity analyses on the  
9 subgroup of COVID-19 cases with a confirmed infection. The same holds for controls from  
10 the POPCORN cohort who (likely) did not suffer from COVID-19: there is a possibility that  
11 these controls did suffer from COVID-19, but that they for example did not test due to the  
12 absence of symptoms or test-material constraints, or that their tests were false negative  
13 (Supplementary Table S1). This might result in some misclassification of cases that had no or  
14 only very mild symptoms, never got tested, and will likely report never having suffered from  
15 COVID-19. This will be described when reporting CORFU study results, and, when deemed  
16 relevant, additional (stratified) analyses will be conducted.

## 21 **ETHICS AND DISSEMINATION**

22 This study will be conducted according to the latest update of the Declaration of Helsinki and  
23 is registered at ClinicalTrials.gov (NCT05240742). Ethics approval was obtained from the  
24 medical research ethics committee (MREC) of Maastricht University Medical Center+ and  
25 Maastricht University (committee reference number METC2021-2990) and the local MRECs  
26 of the participating cohorts (Supplementary Table S2). Participants will be asked for written  
27 or digital informed consent, by the cohort in which they are participating, prior to  
28 administering the first CORFU questionnaire and will be informed that participation is  
29 voluntary. Data will be made available (Open Science/FAIR) subject to ethical approval and  
30 standard access and anonymization procedures.

### 34 **Author contributions**

35 BCTB, BH, BLJHK, CGD, EB, FAK, FWA, GJB, HC, ICCH, JAH, JWLC, KV, MCW and SMJK  
36 conceived and designed the study. CGD, DOK, EBNJJ, MSJNW, SCMNH and SMJK drafted the  
37 manuscript. BCTB, BH, BLJHK, EB, FAK, FWA, GJB, HC, ICCH, JAH, JWLC, KV, LHW, MCW, MDK,  
38 ML, RW and SS critically reviewed the manuscript. All authors read and approved the final  
39 manuscript.

### 42 **Funding**

43 This work is supported by The Netherlands Organization for Health Research and  
44 Development (ZonMW), grant number 10430302110005, and an unrestricted grant has been  
45 received from the EuroQoL Research Foundation. Individual COVID-19 cohorts contributing  
46 to the CORFU study may have been funded independently from this grant.

### 49 **Competing interests**

50 BCTB, BH, BLJHK, GH, DOK, EB, EBNJJ, GJB, ICCH, JAH, JWLC, LHW, MSJNW, MCW, RW,  
51 SCMNH, SMJK, SS and BH declare no competing interests. FAK received research support from  
52 Bayer, BMS, Boehringer-Ingelheim, MSD, Daiichi-Sankyo, Actelion, Boston Scientific, The  
53 Netherlands Organization for Health Research and Development (ZonMW), The Dutch  
54 Thrombosis Association, and The Dutch Heart Foundation. FWA is supported by the National  
55 Institute of Health Research University College London Hospitals Biomedical Research  
56 Centre. For the CAPACITY-COVID cohort participating in CORFU, FWA and ML received

support from Dutch Heart Foundation (2020B006 CAPACITY) an The Netherlands Organization for Health Research and Development (ZonMW) (grant number 10430102110006 DEFENCE). HC received support from Bayer, received consulting fees from Pfizer, Leo, Alveron, Viatrix, Astra Zeneca, and Galapagos, and has stock (options) in Coagulation Profile. KV has royalties or licences for Philips, Medtronic, Abbott, and Biosense Webster, received consulting fees from Philips, Biosense Webster, Boston Scientific, and Medtronic, and has a role in the European Heart Rhythm Association congress organization and digital committee. MDK received a presentation fee from Glaxo Smith Kline. ML is supported by the Alexandre Suerman Stipend of the University Medical Center Utrecht.

#### ORCID iDs:

|                   |                     |
|-------------------|---------------------|
| MSJN Wintjens     | 0000-0002-7384-6002 |
| C Ghossein-Doha   | 0000-0003-4783-0987 |
| EBNJ Janssen      | 0000-0001-6916-7261 |
| DO Klein          | 0000-0003-0182-9569 |
| SCM Heemskerk     | 0000-0002-1320-8084 |
| FW Asselbergs     | 0000-0002-1692-8669 |
| E Birnie          | 0000-0002-4534-4857 |
| GJ Bonsel         | 0000-0002-8364-1086 |
| BCT van Bussel    | 0000-0003-1621-7848 |
| JWL Cals          | 0000-0001-9550-5674 |
| H ten Cate        | 0000-0001-7796-4463 |
| JA Haagsma        | 0000-0002-2055-548X |
| B Hemmen          | 0000-0003-3066-3254 |
| ICC van der Horst | 0000-0003-3891-8522 |
| BLJH Kietselaer   | 0000-0002-0096-8594 |
| FA Klok           | 0000-0001-9961-0754 |
| MD de Kruif       | 0000-0003-2883-9441 |
| M Linschoten      | 0000-0002-4541-080X |
| S van Santen      | NA                  |
| K Vernooij        | 0000-0002-8818-5964 |
| LH Willems        | 0000-0002-2728-9663 |
| R Westerborg      | NA                  |
| MC Warlé          | 0000-0002-1151-4571 |
| SMJ van Kuijk     | 0000-0003-2796-729X |

#### References

1. World Health Organization. A clinical case definition of post COVID-19 condition by a Delphi consensus: World Health Organization 2021.
2. Blomberg B, Mohn KG-I, Brokstad KA, et al. Long COVID in a prospective cohort of home-isolated patients. *Nat Med* 2021;27(9):1607-13.
3. Huang L, Yao Q, Gu X, et al. 1-year outcomes in hospital survivors with COVID-19: a longitudinal cohort study. *The Lancet* 2021;398(10302):747-58.
4. Peghin M, Palese A, Venturini M, et al. Post-COVID-19 symptoms 6 months after acute infection among hospitalized and non-hospitalized patients. *Clin Microbiol Infect* 2021;27(10):1507-13.
5. Lopez-Leon S, Wegman-Ostrosky T, Perelman C, et al. More than 50 Long-term effects of COVID-19: a systematic review and meta-analysis. *medRxiv* 2021



6. Ceban F, Ling S, Lui LMW, et al. Fatigue and Cognitive Impairment in Post-COVID-19 Syndrome: A Systematic Review and Meta-Analysis. *Brain Behav Immun* 2021
7. Buttery S, Philip KEJ, Williams P, et al. Patient symptoms and experience following COVID-19: results from a UK-wide survey. *BMJ Open Respir Res* 2021;8(1)
8. Sudre CH, Murray B, Varsavsky T, et al. Attributes and predictors of long COVID. *Nat Med* 2021;27(4):626-31.
9. Han JH, Womack KN, Tenforde MW, et al. Associations between persistent symptoms after mild COVID-19 and long-term health status, quality of life, and psychological distress. *Influenza Other Respir Viruses* 2022
10. O'Kelly B, Vidal L, Avramovic G, et al. Assessing the impact of COVID-19 at 1-year using the SF-12 questionnaire: Data from the Anticipate longitudinal cohort study. *Int J Infect Dis* 2022;118:236-43.
11. Xie Y, Xu E, Bowe B, et al. Long-term cardiovascular outcomes of COVID-19. *Nat Med* 2022
12. Groff D, Sun A, Ssentongo AE, et al. Short-term and Long-term Rates of Postacute Sequelae of SARS-CoV-2 Infection: A Systematic Review. *JAMA Network Open* 2021;4(10):e2128568-e68.
13. Pedrosa AL, Bitencourt L, Fróes ACF, et al. Emotional, Behavioral, and Psychological Impact of the COVID-19 Pandemic. *Front Psychol* 2020;11:566212-12.
14. Nicola M, Alsafi Z, Sohrabi C, et al. The socio-economic implications of the coronavirus pandemic (COVID-19): A review. *Int J Surg* 2020;78:185-93.
15. Wynberg E, van Willigen HDG, Dijkstra M, et al. Evolution of COVID-19 symptoms during the first 12 months after illness onset. *Clin Infect Dis* 2021
16. Taquet M, Dercon Q, Luciano S, et al. Incidence, co-occurrence, and evolution of long-COVID features: A 6-month retrospective cohort study of 273,618 survivors of COVID-19. *PLoS Med* 2021;18(9):e1003773.
17. Jovanoski N, Chen X, Becker U, et al. Severity of COVID-19 and adverse long-term outcomes: a retrospective cohort study based on a US electronic health record database. *BMJ Open* 2021;11(12):e056284.
18. Bai F, Tomasoni D, Falcinella C, et al. Female gender is associated with long COVID syndrome: a prospective cohort study. *Clin Microbiol Infect* 2021
19. Sigfrid L, Drake TM, Pauley E, et al. Long Covid in adults discharged from UK hospitals after Covid-19: A prospective, multicentre cohort study using the ISARIC WHO Clinical Characterisation Protocol. *medRxiv* 2021:2021.03.18.21253888.
20. Needham DM, Davidson J, Cohen H, et al. Improving long-term outcomes after discharge from intensive care unit: report from a stakeholders' conference. *Crit Care Med* 2012;40(2):502-9.
21. Wiertz CMH, Vints WAJ, Maas G, et al. COVID-19: Patient Characteristics in the First Phase of Postintensive Care Rehabilitation. *Arch Rehabil Res Clin Transl* 2021;3(2):100108.
22. Willems LH, Nagy M, Ten Cate H, et al. Sustained inflammation, coagulation activation and elevated endothelin-1 levels without macrovascular dysfunction at 3 months after COVID-19. *Thromb Res* 2022;209:106-14.
23. Linschoten M, Asselbergs FW. CAPACITY-COVID: a European Registry to determine the role of cardiovascular disease in the COVID-19 pandemic. *Eur Heart J* 2020;41(19):1795-96.
24. CAPACITY-COVID Collaborative Consortium and LEOSS Study Group. Clinical presentation, disease course, and outcome of COVID-19 in hospitalized patients with and without pre-existing cardiac disease: a cohort study across 18 countries. *Eur Heart J* 2022;43(11):1104-20.
25. Kruij M, Cannegieter SC, Ten Cate H, et al. Caging the dragon: Research approach to COVID-19-related thrombosis. *Res Pract Thromb Haemost* 2021;5(2):278-90.
26. Tas J, van Gassel RJJ, Heines SJH, et al. Serial measurements in COVID-19-induced acute respiratory disease to unravel heterogeneity of the disease course: design of the Maastricht Intensive Care COVID cohort (MaastrICChT). *BMJ Open* 2020;10(9):e040175.
27. Long D, Haagsma JA, Janssen MF, et al. Health-related quality of life and mental well-being of healthy and diseased persons in 8 countries: Does stringency of government response against early COVID-19 matter? *SSM Popul Health* 2021;15:100913.

- 1  
2  
3 28. Leijte WT, Wagemaker NM, van Kraaij TD, et al. Sterfte en heropname na ziekenhuisopname met  
4 covid-19. *Ned Tijdschr Geneeskd* 2020  
5  
6 29. Wilkinson MD, Dumontier M, Aalbersberg IJ, et al. The FAIR Guiding Principles for scientific data  
7 management and stewardship. *Scientific Data* 2016;3(1):160018.  
8  
9 30. Sterne JA, White IR, Carlin JB, et al. Multiple imputation for missing data in epidemiological and  
10 clinical research: potential and pitfalls. *BMJ* 2009;338:b2393.  
11  
12 31. Castela Forte J, Perner A, van der Horst ICC. The use of clustering algorithms in critical care  
13 research to unravel patient heterogeneity. *Intensive Care Med* 2019;45(7):1025-28.  
14  
15 32. Wynants L, Van Calster B, Collins GS, et al. Prediction models for diagnosis and prognosis of covid-  
16 19: systematic review and critical appraisal. *BMJ* 2020;369:m1328.  
17  
18 33. Riley RD, Snell KI, Ensor J, et al. Minimum sample size for developing a multivariable prediction  
19 model: PART II - binary and time-to-event outcomes. *Stat Med* 2019;38(7):1276-96.  
20  
21 34. Mazza MG, Palladini M, De Lorenzo R, et al. One-year mental health outcomes in a cohort of  
22 COVID-19 survivors. *J Psychiatr Res* 2021;145:118-24.  
23  
24 35. National Institute for Health and Care Excellence, Scottish Intercollegiate Guidelines Network,  
25 Royal College of General Practitioners. COVID-19 rapid guideline: managing the long-term  
26 effects of COVID-19, 2021.  
27  
28 36. Amin-Chowdhury Z, Ladhani SN. Causation or confounding: why controls are critical for  
29 characterizing long COVID. *Nat Med* 2021;27(7):1129-30.  
30  
31 37. May T, Aughterson H, Fancourt D, et al. 'Stressed, uncomfortable, vulnerable, neglected': a  
32 qualitative study of the psychological and social impact of the COVID-19 pandemic on UK  
33 frontline keyworkers. *BMJ Open* 2021;11(11):e050945.  
34  
35 38. Epifanio MS, Andrei F, Mancini G, et al. The Impact of COVID-19 Pandemic and Lockdown  
36 Measures on Quality of Life among Italian General Population. *J Clin Med* 2021;10(2)  
37  
38  
39  
40  
41  
42  
43  
44  
45  
46  
47  
48  
49  
50  
51  
52  
53  
54  
55  
56  
57  
58  
59  
60

## Figure legends

### Figure 1. Overview of the participating COVID-19 cohorts in the CORFU study

The source population included in the individual cohorts is an estimate as of May 2022. The total number of CORFU study participants might not add up to the total source population (n=12,631) due to non-survivors, participants included in multiple cohorts and participants who might not want to participate in the CORFU study. \*At the time of manuscript preparation, prospective inclusion is ongoing in five cohorts: Adelante, CAPACITY-COVID, DC&TC, ELVIS and MaastricCht cohort.

**Abbreviations:** CAPACITY-COVID: Cardiac complications in patients with COVID-19 cohorts; CORADS: COVID-19 Reporting and Data System Score; COVAS: Bernhoven Early detection of Vascular damage after COVID-19 cohort; CT: Computed Tomography; DC&TC cohort: Dutch COVID & Thrombosis Consortium cohort; ECG: Electrocardiogram; ELVIS: ZuydErLand COVID-19 regiStry; ICU: Intensive Care Unit; MaastricCht: Maastricht Intensive Care COVID cohort; MRI: Magnetic Resonance Imaging; NSAID: Nonsteroidal Anti-Inflammatory Drugs; PCR: Polymerase Chain Reaction; POPCOrn: POPulation health impact of the COVID-19 pandemic; PROMS: Patient-Reported Outcome Measures; VTE: venous thrombo-embolic.

# CORona Follow-Up (CORFU) study

1  
2  
3  
4  
5  
6  
7  
8  
9  
10  
11  
12  
13  
14  
15  
16  
17  
18  
19  
20  
21  
22  
23  
24  
25  
26  
27  
28  
29  
30  
31  
32  
33  
34  
35  
36  
37  
38  
39  
40  
41  
42  
43  
44  
45  
46  
47  
48  
49  
50  
51  
52  
53  
54  
55  
56  
57  
58

| <p><b>Adelante<sup>21</sup></b><br/>(n=158)*</p>                                                                                                                                                                                                                                                                                                                                                                                                                                                                                                                                                                                                                                                                                                                                                                                          | <p><b>CAPACITY-COVID<sup>23,24</sup></b><br/>(n=5,575)*</p>                                                                                                                                                                                                                                                                                                                                                                                                                                                                                                                                                                  | <p><b>COVAS<sup>22</sup></b><br/>(n=203)</p>                                                                                                                                                                                                                                                                                                                                                                                                                                                                                                                                                                                                                                                                                                               | <p><b>DC&amp;TC<sup>25</sup></b><br/>(n=350, nested in CAPACITY-COVID)*</p>                                                                                                                                                                                                                                                                                                                                                                                                                                                                                                                                                                                                                                                                                                                                                                                                                                             | <p><b>ELVIS<sup>28</sup></b><br/>(n=2,543)*</p>                                                                                                                                                                                                                                                                                                                                                                                                                                                            | <p><b>MaastrICCh<sup>26</sup></b><br/>(n=509)*</p>                                                                                                                                                                                                                                                                                                                                                                                                                                                                                                                                                                                                                                                                                                                                                                                                                                                                              | <p><b>POPCOrn<sup>27</sup></b><br/>(n=3,293)</p>                                                                                                                                                                                                                                                                                                                                                                                                                                                                                                                                                                                                                                                                                                                                              |
|-------------------------------------------------------------------------------------------------------------------------------------------------------------------------------------------------------------------------------------------------------------------------------------------------------------------------------------------------------------------------------------------------------------------------------------------------------------------------------------------------------------------------------------------------------------------------------------------------------------------------------------------------------------------------------------------------------------------------------------------------------------------------------------------------------------------------------------------|------------------------------------------------------------------------------------------------------------------------------------------------------------------------------------------------------------------------------------------------------------------------------------------------------------------------------------------------------------------------------------------------------------------------------------------------------------------------------------------------------------------------------------------------------------------------------------------------------------------------------|------------------------------------------------------------------------------------------------------------------------------------------------------------------------------------------------------------------------------------------------------------------------------------------------------------------------------------------------------------------------------------------------------------------------------------------------------------------------------------------------------------------------------------------------------------------------------------------------------------------------------------------------------------------------------------------------------------------------------------------------------------|-------------------------------------------------------------------------------------------------------------------------------------------------------------------------------------------------------------------------------------------------------------------------------------------------------------------------------------------------------------------------------------------------------------------------------------------------------------------------------------------------------------------------------------------------------------------------------------------------------------------------------------------------------------------------------------------------------------------------------------------------------------------------------------------------------------------------------------------------------------------------------------------------------------------------|------------------------------------------------------------------------------------------------------------------------------------------------------------------------------------------------------------------------------------------------------------------------------------------------------------------------------------------------------------------------------------------------------------------------------------------------------------------------------------------------------------|---------------------------------------------------------------------------------------------------------------------------------------------------------------------------------------------------------------------------------------------------------------------------------------------------------------------------------------------------------------------------------------------------------------------------------------------------------------------------------------------------------------------------------------------------------------------------------------------------------------------------------------------------------------------------------------------------------------------------------------------------------------------------------------------------------------------------------------------------------------------------------------------------------------------------------|-----------------------------------------------------------------------------------------------------------------------------------------------------------------------------------------------------------------------------------------------------------------------------------------------------------------------------------------------------------------------------------------------------------------------------------------------------------------------------------------------------------------------------------------------------------------------------------------------------------------------------------------------------------------------------------------------------------------------------------------------------------------------------------------------|
| <p><b>Aim</b><br/>Investigate the course of functioning after COVID-19 disease in patients who were admitted for inpatient or outpatient rehabilitation after discharge and investigate well-being of their relatives</p> <p><b>Study population</b><br/>All patients who:<br/>- were admitted for inpatient rehabilitation at the Adelante rehabilitation center after ICU/hospital discharge; or<br/>- patients who recovered at home and were in need of outpatient rehabilitation</p> <p><b>Available data</b><br/>- Patient characteristics<br/>- Functional characteristics<br/>- Environmental factors<br/>- Personal factors<br/>- Rehabilitation characteristics</p> <p><b>Study design</b><br/>Aligned with:<br/>- CAPACITY-COVID<br/>- DC&amp;TC<br/>- MaastrICCh</p> <p>Similar to:<br/>- COVAS<br/>- ELVIS<br/>- POPCOrn</p> | <p><b>Aim</b><br/>Investigate the role of cardiovascular disease in the COVID-19 pandemic</p> <p><b>Study population</b><br/>Patients admitted to the hospital with (highly suspected) COVID-19</p> <p><b>Available data</b><br/>- Patient characteristics<br/>- Cardiovascular risk factors<br/>- Use of cardiovascular medication<br/>- Use of NSAIDs<br/>- Cardiovascular biomarkers<br/>- ECGs<br/>- Echocardiographical parameters<br/>- In-hospital outcomes</p> <p><b>Study design</b><br/>Aligned with:<br/>- Adelante<br/>- DC&amp;TC<br/>- MaastrICCh</p> <p>Similar to:<br/>- COVAS<br/>- ELVIS<br/>- POPCOrn</p> | <p><b>Aim</b><br/>Investigate a possible relationship between increased inflammation parameters and persistent thrombo-inflammatory and microvascular dysfunction and respiratory symptoms in COVID-19 disease</p> <p><b>Study population</b><br/>All patients admitted to the ward or ICU in Bernhoven Hospital who were:<br/>- confirmed COVID-19 (positive PCR) or<br/>- patients who were COVID-19 positive in the emergency ward and recovered at home</p> <p><b>Available data</b><br/>- Patient characteristics<br/>- Carotid Artery Reactivity test<br/>- Microvascular dysfunction markers in blood plasma<br/>- Inflammatory plasma cytokines<br/>- Coagulation factors and inhibitors</p> <p><b>Study design</b><br/>Similar to all cohorts</p> | <p><b>Aim</b><br/>Investigate the incidence of post VTE complications (specifically: post thrombotic syndrome, chronic thromboembolic disease and chronic thromboembolic pulmonary hypertension) and their impact on outcomes in COVID-19 survivors</p> <p><b>Study population</b><br/>Patients admitted to the hospital between March 1, 2020 and January 1, 2021 who:<br/>- suffered from confirmed COVID-19 (using CT or echocardiography); and<br/>- had a confirmed VTE</p> <p><b>Available data</b><br/>- Patient characteristics<br/>- Biomarkers of inflammation and coagulation<br/>- Imaging and tissue damage during first episode of COVID-19 disease<br/>- PROMS<br/>- Functional tests<br/>- Follow-up moments (3 months, 1 year, 2 years)</p> <p><b>Study design</b><br/>Aligned with:<br/>- Adelante<br/>- CAPACITY-COVID<br/>- MaastrICCh</p> <p>Similar to:<br/>- COVAS<br/>- ELVIS<br/>- POPCOrn</p> | <p><b>Aim</b><br/>Investigate complications after COVID-19 hospitalization, mortality after hospital discharge and readmission (indications and risk factors)</p> <p><b>Study population</b><br/>All patients admitted to Zuyderland Medical Center who suffered from confirmed COVID-19 (positive PCR or a positive scored CT scan of the chest (4 or 5 on CORADS by a radiologist))</p> <p><b>Available data</b><br/>- Patient characteristics</p> <p><b>Study design</b><br/>Similar to all cohorts</p> | <p><b>Aim</b><br/>Unravel clinical heterogeneity of COVID-19 disease during ICU stay and follow-up using serial data</p> <p><b>Study population</b><br/>All patients admitted to the ICU in Maastricht University Medical Center+ who:<br/>- suffered from confirmed COVID-19 (positive PCR or a positive scored CT scan of the chest (4 or 5 on CO-RADS by a radiologist); and<br/>- were intubated; and<br/>- were mechanically ventilated</p> <p><b>Available data</b><br/>- Patient characteristics<br/>- Serial data (medication use, complications, severity of disease, multi organ failure)<br/>- Respiratory parameters<br/>- Markers of coagulation<br/>- Cardiovascular variables<br/>- Metabolic variables<br/>- Follow-up moments (3 months, 1 year)</p> <p><b>Study design</b><br/>Aligned with:<br/>- Adelante<br/>- DC&amp;TC<br/>- CAPACITY-COVID</p> <p>Similar to:<br/>- COVAS<br/>- ELVIS<br/>- POPCOrn</p> | <p><b>Aim</b><br/>Investigate effects of COVID-19 on health-related quality of life, mental health and wellbeing of the general population and investigate the role of individual determinants of health, health system features and government response against COVID-19</p> <p><b>Study population</b><br/>- Patients (18-75 years) who suffered from (suspected or confirmed) COVID-19 (including patients who recovered at home)<br/>- People who did not suffer from COVID-19 will be used as a control group</p> <p><b>Available data</b><br/>- Patient/Control characteristics<br/>- Risk factors<br/>- Use of health services<br/>- Barriers to healthcare<br/>- Care avoiders among this population<br/>- Living situation</p> <p><b>Study design</b><br/>Similar to all cohorts</p> |

1  
2  
3  
4  
5  
6  
7  
8  
9

## SUPPLEMENTARY TABLES

### Prevalence, pathophysiology, prediction and health-related quality of life of long COVID: design of the longitudinal multiple cohort CORona Follow Up (CORFU) study

10  
11  
12  
13  
14  
15  
16  
17  
18  
19  
20  
21  
22  
23  
24  
25  
26  
27  
28  
29  
30  
31  
32  
33  
34  
35  
36  
37  
38  
39  
40  
41  
42  
43  
44  
45  
46  
47  
48  
49  
50  
51  
52  
53  
54  
55  
56  
57  
58  
59  
60

**Table S1.** COVID-19 lockdown, testing policy and vaccination strategy timelines in the Netherlands from 2020 to 2022

| National lockdown and reopening timeline |                                                                                                                                                                                                                                                                                                                                                                                                                                            |
|------------------------------------------|--------------------------------------------------------------------------------------------------------------------------------------------------------------------------------------------------------------------------------------------------------------------------------------------------------------------------------------------------------------------------------------------------------------------------------------------|
| <b>2020</b>                              |                                                                                                                                                                                                                                                                                                                                                                                                                                            |
| February 28                              | First COVID-19 patient in the Netherlands.                                                                                                                                                                                                                                                                                                                                                                                                 |
| March 1                                  | Advise to stay at home when returning from a foreign high risk area and with mild COVID-19 symptoms.                                                                                                                                                                                                                                                                                                                                       |
| March 12                                 | Advise to work from home for all civil servants in non-critical functions.                                                                                                                                                                                                                                                                                                                                                                 |
| March 13                                 | Assembly ban for more than 100 people.                                                                                                                                                                                                                                                                                                                                                                                                     |
| March 15                                 | <b>Partial lockdown:</b> Advice to keep 1.5m distance; Closure of cafes, bars and restaurants, clubs, discotheques, cinemas, theaters, indoor and outdoor sport facilities, fitness centers and wellness centers.                                                                                                                                                                                                                          |
| March 16                                 | Closure of “contact professions” (with the exception of (para)medical professions), primary and secondary schools and day care.                                                                                                                                                                                                                                                                                                            |
| March 20                                 | Visitors are no longer allowed in nursing homes.                                                                                                                                                                                                                                                                                                                                                                                           |
| May 11                                   | Partial reopening of contact professions, primary schools and day care. It is allowed to sport outside with 1.5m distance.                                                                                                                                                                                                                                                                                                                 |
| June 1                                   | Partial reopening of primary secondary schools; Reopening of cafes, bars and restaurants, cinemas and theaters with a maximum of 30 people.                                                                                                                                                                                                                                                                                                |
| June 1                                   | It is mandatory to wear a mask in public transport.                                                                                                                                                                                                                                                                                                                                                                                        |
| June 8                                   | 100% reopening of primary schools and day care.                                                                                                                                                                                                                                                                                                                                                                                            |
| June 15                                  | Nursing home residents are allowed to have 1 fixed visitor per day.                                                                                                                                                                                                                                                                                                                                                                        |
| July 1                                   | The assembly ban for larger assemblies is abolished.                                                                                                                                                                                                                                                                                                                                                                                       |
| August 18                                | Assembly ceiling is lowered to 6 visitors (>12 years) at home per day.                                                                                                                                                                                                                                                                                                                                                                     |
| August 31                                | 100% reopening of secondary schools.                                                                                                                                                                                                                                                                                                                                                                                                       |
| September 29                             | Assembly ceiling is lowered to 3 visitors (>12 years) at home per day; Cafes, bars and restaurants must close at 22.00; Contact professions are obliged to register clients; Closure of sports cafeterias; Sports competitions are without any audience.                                                                                                                                                                                   |
| October 14                               | <b>Partial lockdown:</b> Advise to wear masks in publicly accessible locations inside; Assembly ceiling is lowered to 3 visitors (>12 years) at home per day; Assembly ban for more than 30 people inside; Closure of cafes, bars and restaurants; Event and sports competitions ban; Students in secondary schools, MBO, HBO and universities are obliged to wear mask outside of class; Assembly ban for sports with more than 4 people. |
| November 4                               | The advice is to stay at home; Assembly ceiling is lowered to 2 visitors or 1 household at home per day (both inside and outside); Closure of publicly accessible locations; Assembly ban for sports with more than 2 people.                                                                                                                                                                                                              |
| December 1                               | It is mandatory to wear a mask (>12 years) in publicly accessible locations inside.                                                                                                                                                                                                                                                                                                                                                        |
| December 14                              | <b>Lockdown:</b> Closure of all non-essential shops, indoor and outdoor sports facilities, fitness centers, primary and secondary schools and day care.                                                                                                                                                                                                                                                                                    |
| <b>2021</b>                              |                                                                                                                                                                                                                                                                                                                                                                                                                                            |
| January 20                               | Assembly ceiling is lowered to 1 visitor (>12 years) at home per day.                                                                                                                                                                                                                                                                                                                                                                      |

|              |                                                                                                                                                                                                                                                                                                                                                                                                                                                      |
|--------------|------------------------------------------------------------------------------------------------------------------------------------------------------------------------------------------------------------------------------------------------------------------------------------------------------------------------------------------------------------------------------------------------------------------------------------------------------|
| January 23   | Curfew between 21:00-04.30.                                                                                                                                                                                                                                                                                                                                                                                                                          |
| February 8   | Reopening of primary schools and day care; Non-essential shops are allowed to open for "click and collect".                                                                                                                                                                                                                                                                                                                                          |
| March 1      | Partial reopening of secondary schools and MBO.                                                                                                                                                                                                                                                                                                                                                                                                      |
| March 3      | Partial reopening of contact professions, non-essential shops (appointment-based); Assembly ban for outside sports is abolished for people $\leq 26$ years within their own sports club.                                                                                                                                                                                                                                                             |
| March 8      | Vaccinated nursing home residents are allowed to have 2 visitors per day.                                                                                                                                                                                                                                                                                                                                                                            |
| March 16     | Assembly ceiling for outside sports is increased to 4 people.                                                                                                                                                                                                                                                                                                                                                                                        |
| March 31     | Curfew between 22:00-4:30.                                                                                                                                                                                                                                                                                                                                                                                                                           |
| April 26     | Partial reopening of HBO and universities.                                                                                                                                                                                                                                                                                                                                                                                                           |
| April 28     | Curfew is abolished; Assembly ceiling is increased to 2 visitor (>12 years) at home per day; Reopening of terraces between 12:00-18:00 with a maximum of 2 persons or 1 household per table; Reopening of non-essential stores with a maximum of 1 customer per 25m <sup>2</sup> .                                                                                                                                                                   |
| May 19       | Assembly ceiling for outside sports is increased to 30 adults; Reopening of swimming pools, sports facilities and fitness centers with an assembly ban of more than 30 people; Reopening of outside publicly accessible locations (appointment-based) and libraries.                                                                                                                                                                                 |
| June 5       | Assembly ceiling is increased to 4 visitors (>12 years) at home per day; Assembly ban for outside groups of more than 4 people; Assembly ceiling for outside sports is increased to 50 adults; Reopening of dressing rooms and sports cafeterias; Reopening of cafes, bars and restaurants including terraces between 06:00-22:00, museums, cinemas and theatres,                                                                                    |
| June 26      | Assembly ban for visitors at home is abolished; No more regulations for a maximum number of people outside in a group; It is mandatory to wear masks when there is no 1.5m distance; Prolonged opening hours for cafes, bars, restaurants, shops and theaters; Reopening of clubs and discotheques; Advise to work from home 50% of the time; Events are allowed with a covid certificate; Amateur sports competitions can be held with an audience. |
| July 10      | Closure of clubs and discotheques; Events have a maximum duration of 24 hours and participants must be seated (67% capacity); Cafes, bars and restaurants must close at 00:00 and visitors must be seated.                                                                                                                                                                                                                                           |
| July 19      | Working from home unless this is not possible.                                                                                                                                                                                                                                                                                                                                                                                                       |
| August 8     | Returning from countries with a yellow travel advice is only possible with a covid certificate.                                                                                                                                                                                                                                                                                                                                                      |
| August 30    | Partial reopening of MBO, HBO and universities without 1.5m distance.                                                                                                                                                                                                                                                                                                                                                                                |
| September 25 | Covid certificate is mandatory (> 12 years) in cafes, bars and restaurants, at festivals and events, at sports competitions, cinemas and theaters.                                                                                                                                                                                                                                                                                                   |
| September 25 | It is no longer mandatory to keep 1.5m distance; Working from home if possible; Maximum number of visitors for inside festivals, shows, parties and sports competitions which must close at 00:00.                                                                                                                                                                                                                                                   |
| November 3   | Work from home for at least 50% of the time.                                                                                                                                                                                                                                                                                                                                                                                                         |
| November 6   | Wear a mask in buildings without the need for a covid certificate; Use of the mandatory covid certificate is expended.                                                                                                                                                                                                                                                                                                                               |
| November 12  | Keep 1.5m distance in places without mandatory covid certificate; Non-essential stores must close at 18:00h; Cafes, bars and restaurants must close at 20:00; Events must stop at 17:00h and visitors must have a fixed seat with a maximum of 1.250 visitors; No audience at sports competitions; Assembly ceiling lowered to 75 people per room in MBO, HBO and                                                                                    |

|                                |                                                                                                                                                                                                                                                                                                                                                                                        |
|--------------------------------|----------------------------------------------------------------------------------------------------------------------------------------------------------------------------------------------------------------------------------------------------------------------------------------------------------------------------------------------------------------------------------------|
|                                | universities; Work from home; Assembly ceiling is lowered to 4 visitors (>12 years) at home per day.                                                                                                                                                                                                                                                                                   |
| November 26                    | Everything must close at 17:00h, except for essential stores which must close at 20:00h; Teachers and students at primary and secondary school must wear a mask and test regularly.                                                                                                                                                                                                    |
| December 14                    | Primary schools and day care close a week before Christmas holidays.                                                                                                                                                                                                                                                                                                                   |
| December 19                    | <b>Lockdown:</b> Stay at home if possible; Assembly ceiling of 2 persons or 1 household outside; Assembly ceiling lowered to 2 visitors (>12 years) at home per day; Closure of publicly accessible locations and schools.                                                                                                                                                             |
| <b>2022</b>                    |                                                                                                                                                                                                                                                                                                                                                                                        |
| January 10                     | Reopening of primary and secondary schools and day care.                                                                                                                                                                                                                                                                                                                               |
| January 15                     | Reopening of MBO, HBO and universities, cultural lessons inside and outside (without audience), sporting facilities inside and outside; Non-essential shops must close at 17:00, Essential shops must close at 20:00, contact professions must close at 17:00; It is advised to wear a mask; Assembly ceiling increased to 4 visitors (>12 years) at home per day.                     |
| January 26                     | Cafes, bars, restaurants, theaters, cinemas, museums, concert halls, zoos and theme parks are open between 5:00-22:00 under the conditions of a covid certificate, wearing a mask, and fixed seats; Reopening of events inside and outside with fixed seats and an assembly ban of more than 1.250 visitors (festivals are not allowed); Audience is permitted at sports competitions. |
| February 15                    | No assembly ceiling for visitors at home; Working from home 50% of the time.                                                                                                                                                                                                                                                                                                           |
| February 18                    | Everything is allowed to be open until 01:00; With a covid certificate it is no longer obligated to be seated during events and to wear masks.                                                                                                                                                                                                                                         |
| February 25                    | Everything is allowed to have normal opening hours; End of the 1.5m distance regulation; End of the obligatory seated events; It is only obligated to wear a mask at public transport and the Dutch airports; It is no longer obligated to make use of the covid certificate.                                                                                                          |
| March 15                       | All regulations are converted into advices.                                                                                                                                                                                                                                                                                                                                            |
| March 23                       | It is no longer obligated to wear a mask in public transport.                                                                                                                                                                                                                                                                                                                          |
| May 20                         | It is no longer obligated to wear a mask at the Dutch airports.                                                                                                                                                                                                                                                                                                                        |
| <b>Testing policy timeline</b> |                                                                                                                                                                                                                                                                                                                                                                                        |
| <b>2020</b>                    |                                                                                                                                                                                                                                                                                                                                                                                        |
| April 6                        | Testing only for citizens who experience COVID-19 symptoms for at least 24 hours AND accommodate specific criteria (e.g. key workers in healthcare and other key professions such as law enforcement, and people with a high risk of severe COVID-19 disease) at the Municipal Health Service.                                                                                         |
| May 6                          | Testing also for teachers and day care personnel who experience COVID-19 symptoms for at least 24 hours at the Municipal Health Service.                                                                                                                                                                                                                                               |
| May 11                         | Testing also for the majority of the contact professions who experience COVID-19 symptoms for at least 24 hours at the Municipal Health Service.                                                                                                                                                                                                                                       |
| May 18                         | Testing also for informal care givers who experience COVID-19 symptoms for at least 24 hours at the Municipal Health Service.                                                                                                                                                                                                                                                          |
| June 1                         | Testing of any citizen experiencing COVID-19 symptoms at the Municipal Health Service.                                                                                                                                                                                                                                                                                                 |
| December 1                     | Testing of citizens without COVID-19 symptoms when they have been in contact with a SarS-CoV-2 positive person at the Municipal Health Service.                                                                                                                                                                                                                                        |

|                                      |                                                                                                                                                                                   |
|--------------------------------------|-----------------------------------------------------------------------------------------------------------------------------------------------------------------------------------|
| <b>2021</b>                          |                                                                                                                                                                                   |
| March 31                             | Everyone can buy COVID-19 self-tests in the Dutch pharmacies, but testing at the Municipal Health Service is still required.                                                      |
| December 2                           | Citizens with COVID-19 symptoms can perform self-test or go to the Municipal Health Service for a test. A positive self-test should be confirmed at the Municipal Health Service. |
| <b>2022</b>                          |                                                                                                                                                                                   |
| March 15                             | No more need to test without experiencing of COVID-19 symptoms.                                                                                                                   |
| April 11                             | Everyone can use a self-test when experiencing COVID-19 symptoms, it is no longer mandatory to confirm this at the Municipal Health Service.                                      |
| <b>Vaccination strategy timeline</b> |                                                                                                                                                                                   |
| <b>2021</b>                          |                                                                                                                                                                                   |
| January 6                            | Start of first vaccination round for key healthcare workers.                                                                                                                      |
| January 18                           | Start of first vaccination round for nursing home residents.                                                                                                                      |
| January 29                           | Start of first vaccination round for every citizen $\geq 18$ years (start with the eldest age groups).                                                                            |
| July 2                               | Start of first vaccination round for teenagers (12-17 years).                                                                                                                     |
| November 18-23                       | Start of first booster round for citizens 60-80+, nursing home residents and healthcare workers with patient contact.                                                             |
| December 20                          | Start of first vaccination round for children (5-11 years) with a high-risk medical indication.                                                                                   |
| <b>2022</b>                          |                                                                                                                                                                                   |
| January 18                           | Start of first vaccination round for children (5-11 years) without a medical indication.                                                                                          |
| January 6                            | Start of first booster round for every citizen $\geq 18$ years.                                                                                                                   |
| February 24                          | Start of second booster round for 70+ citizens, nursing home residents and citizens with severely compromised resistance.                                                         |
| March 7                              | Start of first booster round for teenagers (12-17 years).                                                                                                                         |
| September 19                         | Start of second booster vaccination round for every citizen $\geq 12$ years (start with key healthcare workers and people with a high risk of severe COVID-19 disease).           |

The information depicted by this table is available from:

1. The National Institute for Public Health and the Environment (In Dutch: Rijksinstituut voor Volksgezondheid en Milieu (RIVM)) from <https://www.rivm.nl/gedragsonderzoek/tijdlijn-maatregelen-covid>
2. The Dutch Government (In Dutch: Rijksoverheid) from
  - a. <https://www.rijksoverheid.nl/onderwerpen/coronavirus-tijdlijn>
  - b. <https://www.rijksoverheid.nl/onderwerpen/coronavirus-vaccinatie/nieuws>



**Table S2.** Overview of ethics approval information per cohort

| Cohort acronym | Corresponding MREC                                                       | MREC Registration ID                                                                             | Additional cohort registration               |
|----------------|--------------------------------------------------------------------------|--------------------------------------------------------------------------------------------------|----------------------------------------------|
| Adelante       | MREC Zuyderland                                                          | METCZ20200086                                                                                    | n.a.                                         |
| CAPACITY-COVID | MREC Utrecht                                                             | CAPACITY 1: 20-161/C<br>CAPACITY 2: 21-097/M<br>DEFENCE: 21-532/C                                | ClinicalTrials.gov:<br>NCT04325412           |
| COVAS          | MREC Oost Nederland                                                      | NL74101.091.20                                                                                   | n.a.                                         |
| DC&TC          | n.a.                                                                     | n.a.                                                                                             | n.a.                                         |
| ELVIS          | MREC Z - Zuyderland                                                      | METCZ20200121                                                                                    | n.a.                                         |
| MaastrICcht    | MREC Maastricht University<br>Medical Center+ / Maastricht<br>University | Follow Up cohort: 2020-2368-A-2;<br>2020-2368-A-1; 2020-2368<br>Initial cohort: 2020-1565/300523 | The Netherlands<br>Trial Register:<br>NL8613 |
| POPCOrn        | MREC Erasmus Medical<br>Center, Rotterdam                                | MEC-2020-0266                                                                                    | n.a.                                         |

**Abbreviations:** CAPACITY-COVID: Cardiac complications in patients with COVID-19 cohorts; COVAS: Bernhoven Early detection of Vascular damage after COVID-19 cohort; DC&TC cohort: Dutch COVID & Thrombosis Consortium cohort; ELVIS: ZuydErLand COVID-19 regiStry; MaastrICcht: Maastricht Intensive Care COVID cohort; MREC: Medical Research Ethics Committee; n.a.: not applicable; POPCOrn: POPulation health impact of the COVID-19 pandemic
