# Supplementary material for: Prevalence, pathophysiology, prediction and health-related quality of life of long COVID: study protocol of the longitudinal multiple cohort CORona Follow Up (CORFU) study
Source: PubMed Central journal article supplement — BMJ Open. 2022 Nov 29;12(11):e065142. doi: 10.1136/bmjopen-2022-065142 (PMC9709810; doi:10.1136/bmjopen-2022-065142), 2022-11-29
Supplement: bmjopen-2022-065142supp001.pdf [file bmjopen-2022-065142supp001.pdf]

## SUPPLEMENTARY TABLES

**Prevalence, pathophysiology, prediction and health-related quality of life of long COVID: design of the longitudinal multiple cohort CORona Follow Up (CORFU) study****Table S1.** COVID-19 lockdown, testing policy and vaccination strategy timelines in the Netherlands from 2020 to 2022

| National lockdown and reopening timeline |                                                                                                                                                                                                                                                                                                                                                                                                                                            |
|------------------------------------------|--------------------------------------------------------------------------------------------------------------------------------------------------------------------------------------------------------------------------------------------------------------------------------------------------------------------------------------------------------------------------------------------------------------------------------------------|
| <b>2020</b>                              |                                                                                                                                                                                                                                                                                                                                                                                                                                            |
| February 28                              | First COVID-19 patient in the Netherlands.                                                                                                                                                                                                                                                                                                                                                                                                 |
| March 1                                  | Advise to stay at home when returning from a foreign high risk area and with mild COVID-19 symptoms.                                                                                                                                                                                                                                                                                                                                       |
| March 12                                 | Advise to work from home for all civil servants in non-critical functions.                                                                                                                                                                                                                                                                                                                                                                 |
| March 13                                 | Assembly ban for more than 100 people.                                                                                                                                                                                                                                                                                                                                                                                                     |
| March 15                                 | <b>Partial lockdown:</b> Advice to keep 1.5m distance; Closure of cafes, bars and restaurants, clubs, discotheques, cinemas, theaters, indoor and outdoor sport facilities, fitness centers and wellness centers.                                                                                                                                                                                                                          |
| March 16                                 | Closure of “contact professions” (with the exception of (para)medical professions), primary and secondary schools and day care.                                                                                                                                                                                                                                                                                                            |
| March 20                                 | Visitors are no longer allowed in nursing homes.                                                                                                                                                                                                                                                                                                                                                                                           |
| May 11                                   | Partial reopening of contact professions, primary schools and day care. It is allowed to sport outside with 1.5m distance.                                                                                                                                                                                                                                                                                                                 |
| June 1                                   | Partial reopening of primary secondary schools; Reopening of cafes, bars and restaurants, cinemas and theaters with a maximum of 30 people.                                                                                                                                                                                                                                                                                                |
| June 1                                   | It is mandatory to wear a mask in public transport.                                                                                                                                                                                                                                                                                                                                                                                        |
| June 8                                   | 100% reopening of primary schools and day care.                                                                                                                                                                                                                                                                                                                                                                                            |
| June 15                                  | Nursing home residents are allowed to have 1 fixed visitor per day.                                                                                                                                                                                                                                                                                                                                                                        |
| July 1                                   | The assembly ban for larger assemblies is abolished.                                                                                                                                                                                                                                                                                                                                                                                       |
| August 18                                | Assembly ceiling is lowered to 6 visitors (>12 years) at home per day.                                                                                                                                                                                                                                                                                                                                                                     |
| August 31                                | 100% reopening of secondary schools.                                                                                                                                                                                                                                                                                                                                                                                                       |
| September 29                             | Assembly ceiling is lowered to 3 visitors (>12 years) at home per day; Cafes, bars and restaurants must close at 22.00; Contact professions are obliged to register clients; Closure of sports cafeterias; Sports competitions are without any audience.                                                                                                                                                                                   |
| October 14                               | <b>Partial lockdown:</b> Advise to wear masks in publicly accessible locations inside; Assembly ceiling is lowered to 3 visitors (>12 years) at home per day; Assembly ban for more than 30 people inside; Closure of cafes, bars and restaurants; Event and sports competitions ban; Students in secondary schools, MBO, HBO and universities are obliged to wear mask outside of class; Assembly ban for sports with more than 4 people. |
| November 4                               | The advice is to stay at home; Assembly ceiling is lowered to 2 visitors or 1 household at home per day (both inside and outside); Closure of publicly accessible locations; Assembly ban for sports with more than 2 people.                                                                                                                                                                                                              |
| December 1                               | It is mandatory to wear a mask (>12 years) in publicly accessible locations inside.                                                                                                                                                                                                                                                                                                                                                        |
| December 14                              | <b>Lockdown:</b> Closure of all non-essential shops, indoor and outdoor sports facilities, fitness centers, primary and secondary schools and day care.                                                                                                                                                                                                                                                                                    |
| <b>2021</b>                              |                                                                                                                                                                                                                                                                                                                                                                                                                                            |
| January 20                               | Assembly ceiling is lowered to 1 visitor (>12 years) at home per day.                                                                                                                                                                                                                                                                                                                                                                      |

|              |                                                                                                                                                                                                                                                                                                                                                                                                                                                      |
|--------------|------------------------------------------------------------------------------------------------------------------------------------------------------------------------------------------------------------------------------------------------------------------------------------------------------------------------------------------------------------------------------------------------------------------------------------------------------|
| January 23   | Curfew between 21:00-04.30.                                                                                                                                                                                                                                                                                                                                                                                                                          |
| February 8   | Reopening of primary schools and day care; Non-essential shops are allowed to open for "click and collect".                                                                                                                                                                                                                                                                                                                                          |
| March 1      | Partial reopening of secondary schools and MBO.                                                                                                                                                                                                                                                                                                                                                                                                      |
| March 3      | Partial reopening of contact professions, non-essential shops (appointment-based); Assembly ban for outside sports is abolished for people $\leq 26$ years within their own sports club.                                                                                                                                                                                                                                                             |
| March 8      | Vaccinated nursing home residents are allowed to have 2 visitors per day.                                                                                                                                                                                                                                                                                                                                                                            |
| March 16     | Assembly ceiling for outside sports is increased to 4 people.                                                                                                                                                                                                                                                                                                                                                                                        |
| March 31     | Curfew between 22:00-4:30.                                                                                                                                                                                                                                                                                                                                                                                                                           |
| April 26     | Partial reopening of HBO and universities.                                                                                                                                                                                                                                                                                                                                                                                                           |
| April 28     | Curfew is abolished; Assembly ceiling is increased to 2 visitor ( $>12$ years) at home per day; Reopening of terraces between 12:00-18:00 with a maximum of 2 persons or 1 household per table; Reopening of non-essential stores with a maximum of 1 customer per 25m <sup>2</sup> .                                                                                                                                                                |
| May 19       | Assembly ceiling for outside sports is increased to 30 adults; Reopening of swimming pools, sports facilities and fitness centers with an assembly ban of more than 30 people; Reopening of outside publicly accessible locations (appointment-based) and libraries.                                                                                                                                                                                 |
| June 5       | Assembly ceiling is increased to 4 visitors ( $>12$ years) at home per day; Assembly ban for outside groups of more than 4 people; Assembly ceiling for outside sports is increased to 50 adults; Reopening of dressing rooms and sports cafeterias; Reopening of cafes, bars and restaurants including terraces between 06:00-22:00, museums, cinemas and theatres,                                                                                 |
| June 26      | Assembly ban for visitors at home is abolished; No more regulations for a maximum number of people outside in a group; It is mandatory to wear masks when there is no 1.5m distance; Prolonged opening hours for cafes, bars, restaurants, shops and theaters; Reopening of clubs and discotheques; Advise to work from home 50% of the time; Events are allowed with a covid certificate; Amateur sports competitions can be held with an audience. |
| July 10      | Closure of clubs and discotheques; Events have a maximum duration of 24 hours and participants must be seated (67% capacity); Cafes, bars and restaurants must close at 00:00 and visitors must be seated.                                                                                                                                                                                                                                           |
| July 19      | Working from home unless this is not possible.                                                                                                                                                                                                                                                                                                                                                                                                       |
| August 8     | Returning from countries with a yellow travel advice is only possible with a covid certificate.                                                                                                                                                                                                                                                                                                                                                      |
| August 30    | Partial reopening of MBO, HBO and universities without 1.5m distance.                                                                                                                                                                                                                                                                                                                                                                                |
| September 25 | Covid certificate is mandatory ( $> 12$ years) in cafes, bars and restaurants, at festivals and events, at sports competitions, cinemas and theaters.                                                                                                                                                                                                                                                                                                |
| September 25 | It is no longer mandatory to keep 1.5m distance; Working from home if possible; Maximum number of visitors for inside festivals, shows, parties and sports competitions which must close at 00:00.                                                                                                                                                                                                                                                   |
| November 3   | Work from home for at least 50% of the time.                                                                                                                                                                                                                                                                                                                                                                                                         |
| November 6   | Wear a mask in buildings without the need for a covid certificate; Use of the mandatory covid certificate is expended.                                                                                                                                                                                                                                                                                                                               |
| November 12  | Keep 1.5m distance in places without mandatory covid certificate; Non-essential stores must close at 18:00h; Cafes, bars and restaurants must close at 20:00; Events must stop at 17:00h and visitors must have a fixed seat with a maximum of 1.250 visitors; No audience at sports competitions; Assembly ceiling lowered to 75 people per room in MBO, HBO and                                                                                    |

|                                |                                                                                                                                                                                                                                                                                                                                                                                        |
|--------------------------------|----------------------------------------------------------------------------------------------------------------------------------------------------------------------------------------------------------------------------------------------------------------------------------------------------------------------------------------------------------------------------------------|
|                                | universities; Work from home; Assembly ceiling is lowered to 4 visitors (>12 years) at home per day.                                                                                                                                                                                                                                                                                   |
| November 26                    | Everything must close at 17:00h, except for essential stores which must close at 20:00h; Teachers and students at primary and secondary school must wear a mask and test regularly.                                                                                                                                                                                                    |
| December 14                    | Primary schools and day care close a week before Christmas holidays.                                                                                                                                                                                                                                                                                                                   |
| December 19                    | <b>Lockdown:</b> Stay at home if possible; Assembly ceiling of 2 persons or 1 household outside; Assembly ceiling lowered to 2 visitors (>12 years) at home per day; Closure of publicly accessible locations and schools.                                                                                                                                                             |
| <b>2022</b>                    |                                                                                                                                                                                                                                                                                                                                                                                        |
| January 10                     | Reopening of primary and secondary schools and day care.                                                                                                                                                                                                                                                                                                                               |
| January 15                     | Reopening of MBO, HBO and universities, cultural lessons inside and outside (without audience), sporting facilities inside and outside; Non-essential shops must close at 17:00, Essential shops must close at 20:00, contact professions must close at 17:00; It is advised to wear a mask; Assembly ceiling increased to 4 visitors (>12 years) at home per day.                     |
| January 26                     | Cafes, bars, restaurants, theaters, cinemas, museums, concert halls, zoos and theme parks are open between 5:00-22:00 under the conditions of a covid certificate, wearing a mask, and fixed seats; Reopening of events inside and outside with fixed seats and an assembly ban of more than 1.250 visitors (festivals are not allowed); Audience is permitted at sports competitions. |
| February 15                    | No assembly ceiling for visitors at home; Working from home 50% of the time.                                                                                                                                                                                                                                                                                                           |
| February 18                    | Everything is allowed to be open until 01:00; With a covid certificate it is no longer obligated to be seated during events and to wear masks.                                                                                                                                                                                                                                         |
| February 25                    | Everything is allowed to have normal opening hours; End of the 1.5m distance regulation; End of the obligatory seated events; It is only obligated to wear a mask at public transport and the Dutch airports; It is no longer obligated to make use of the covid certificate.                                                                                                          |
| March 15                       | All regulations are converted into advices.                                                                                                                                                                                                                                                                                                                                            |
| March 23                       | It is no longer obligated to wear a mask in public transport.                                                                                                                                                                                                                                                                                                                          |
| May 20                         | It is no longer obligated to wear a mask at the Dutch airports.                                                                                                                                                                                                                                                                                                                        |
| <b>Testing policy timeline</b> |                                                                                                                                                                                                                                                                                                                                                                                        |
| <b>2020</b>                    |                                                                                                                                                                                                                                                                                                                                                                                        |
| April 6                        | Testing only for citizens who experience COVID-19 symptoms for at least 24 hours AND accommodate specific criteria (e.g. key workers in healthcare and other key professions such as law enforcement, and people with a high risk of severe COVID-19 disease) at the Municipal Health Service.                                                                                         |
| May 6                          | Testing also for teachers and day care personnel who experience COVID-19 symptoms for at least 24 hours at the Municipal Health Service.                                                                                                                                                                                                                                               |
| May 11                         | Testing also for the majority of the contact professions who experience COVID-19 symptoms for at least 24 hours at the Municipal Health Service.                                                                                                                                                                                                                                       |
| May 18                         | Testing also for informal care givers who experience COVID-19 symptoms for at least 24 hours at the Municipal Health Service.                                                                                                                                                                                                                                                          |
| June 1                         | Testing of any citizen experiencing COVID-19 symptoms at the Municipal Health Service.                                                                                                                                                                                                                                                                                                 |
| December 1                     | Testing of citizens without COVID-19 symptoms when they have been in contact with a SarS-CoV-2 positive person at the Municipal Health Service.                                                                                                                                                                                                                                        |

|                                      |                                                                                                                                                                                   |
|--------------------------------------|-----------------------------------------------------------------------------------------------------------------------------------------------------------------------------------|
| <b>2021</b>                          |                                                                                                                                                                                   |
| March 31                             | Everyone can buy COVID-19 self-tests in the Dutch pharmacies, but testing at the Municipal Health Service is still required.                                                      |
| December 2                           | Citizens with COVID-19 symptoms can perform self-test or go to the Municipal Health Service for a test. A positive self-test should be confirmed at the Municipal Health Service. |
| <b>2022</b>                          |                                                                                                                                                                                   |
| March 15                             | No more need to test without experiencing of COVID-19 symptoms.                                                                                                                   |
| April 11                             | Everyone can use a self-test when experiencing COVID-19 symptoms, it is no longer mandatory to confirm this at the Municipal Health Service.                                      |
| <b>Vaccination strategy timeline</b> |                                                                                                                                                                                   |
| <b>2021</b>                          |                                                                                                                                                                                   |
| January 6                            | Start of first vaccination round for key healthcare workers.                                                                                                                      |
| January 18                           | Start of first vaccination round for nursing home residents.                                                                                                                      |
| January 29                           | Start of first vaccination round for every citizen $\geq 18$ years (start with the eldest age groups).                                                                            |
| July 2                               | Start of first vaccination round for teenagers (12-17 years).                                                                                                                     |
| November 18-23                       | Start of first booster round for citizens 60-80+, nursing home residents and healthcare workers with patient contact.                                                             |
| December 20                          | Start of first vaccination round for children (5-11 years) with a high-risk medical indication.                                                                                   |
| <b>2022</b>                          |                                                                                                                                                                                   |
| January 18                           | Start of first vaccination round for children (5-11 years) without a medical indication.                                                                                          |
| January 6                            | Start of first booster round for every citizen $\geq 18$ years.                                                                                                                   |
| February 24                          | Start of second booster round for 70+ citizens, nursing home residents and citizens with severely compromised resistance.                                                         |
| March 7                              | Start of first booster round for teenagers (12-17 years).                                                                                                                         |
| September 19                         | Start of second booster vaccination round for every citizen $\geq 12$ years (start with key healthcare workers and people with a high risk of severe COVID-19 disease).           |

The information depicted by this table is available from:

1. The National Institute for Public Health and the Environment (In Dutch: Rijksinstituut voor Volksgezondheid en Milieu (RIVM)) from <https://www.rivm.nl/gedragsonderzoek/tijddlijn-maatregelen-covid>
2. The Dutch Government (In Dutch: Rijksoverheid) from
  - a. <https://www.rijksoverheid.nl/onderwerpen/coronavirus-tijddlijn>
  - b. <https://www.rijksoverheid.nl/onderwerpen/coronavirus-vaccinatie/nieuws>

**Table S2.** Overview of ethics approval information per cohort

| Cohort acronym | Corresponding MREC                                                       | MREC Registration ID                                                                             | Additional cohort registration               |
|----------------|--------------------------------------------------------------------------|--------------------------------------------------------------------------------------------------|----------------------------------------------|
| Adelante       | MREC Zuyderland                                                          | METCZ20200086                                                                                    | n.a.                                         |
| CAPACITY-COVID | MREC Utrecht                                                             | CAPACITY 1: 20-161/C<br>CAPACITY 2: 21-097/M<br>DEFENCE: 21-532/C                                | ClinicalTrials.gov:<br>NCT04325412           |
| COVAS          | MREC Oost Nederland                                                      | NL74101.091.20                                                                                   | n.a.                                         |
| DC&TC          | n.a.                                                                     | n.a.                                                                                             | n.a.                                         |
| ELVIS          | MREC Z - Zuyderland                                                      | METCZ20200121                                                                                    | n.a.                                         |
| MaastrICht     | MREC Maastricht University<br>Medical Center+ / Maastricht<br>University | Follow Up cohort: 2020-2368-A-2;<br>2020-2368-A-1; 2020-2368<br>Initial cohort: 2020-1565/300523 | The Netherlands<br>Trial Register:<br>NL8613 |
| POPCorn        | MREC Erasmus Medical<br>Center, Rotterdam                                | MEC-2020-0266                                                                                    | n.a.                                         |

**Abbreviations:** CAPACITY-COVID: Cardiac complications in patients with COVID-19 cohorts; COVAS: Bernhoven Early detection of Vascular damage after COVID-19 cohort; DC&TC cohort: Dutch COVID & Thrombosis Consortium cohort; ELVIS: ZuydErLand COVID-19 regiStry; MaastrICht: Maastricht Intensive Care COVID cohort; MREC: Medical Research Ethics Committee; n.a.: not applicable; POPCorn: POPulation health impact of the COVID-19 pandemic
